# Supplementary material for: N-glycosylation of ERLIN2 promotes hepatocellular carcinoma progression by enhancing CCNB1 stability
Source: Research Square preprint supplement (doi:10.21203/rs.3.rs-8602481/v1), 2026-02-11
Supplement: Supplementary file 1 [file 8544aa36587ea2b583cfa96a.docx]

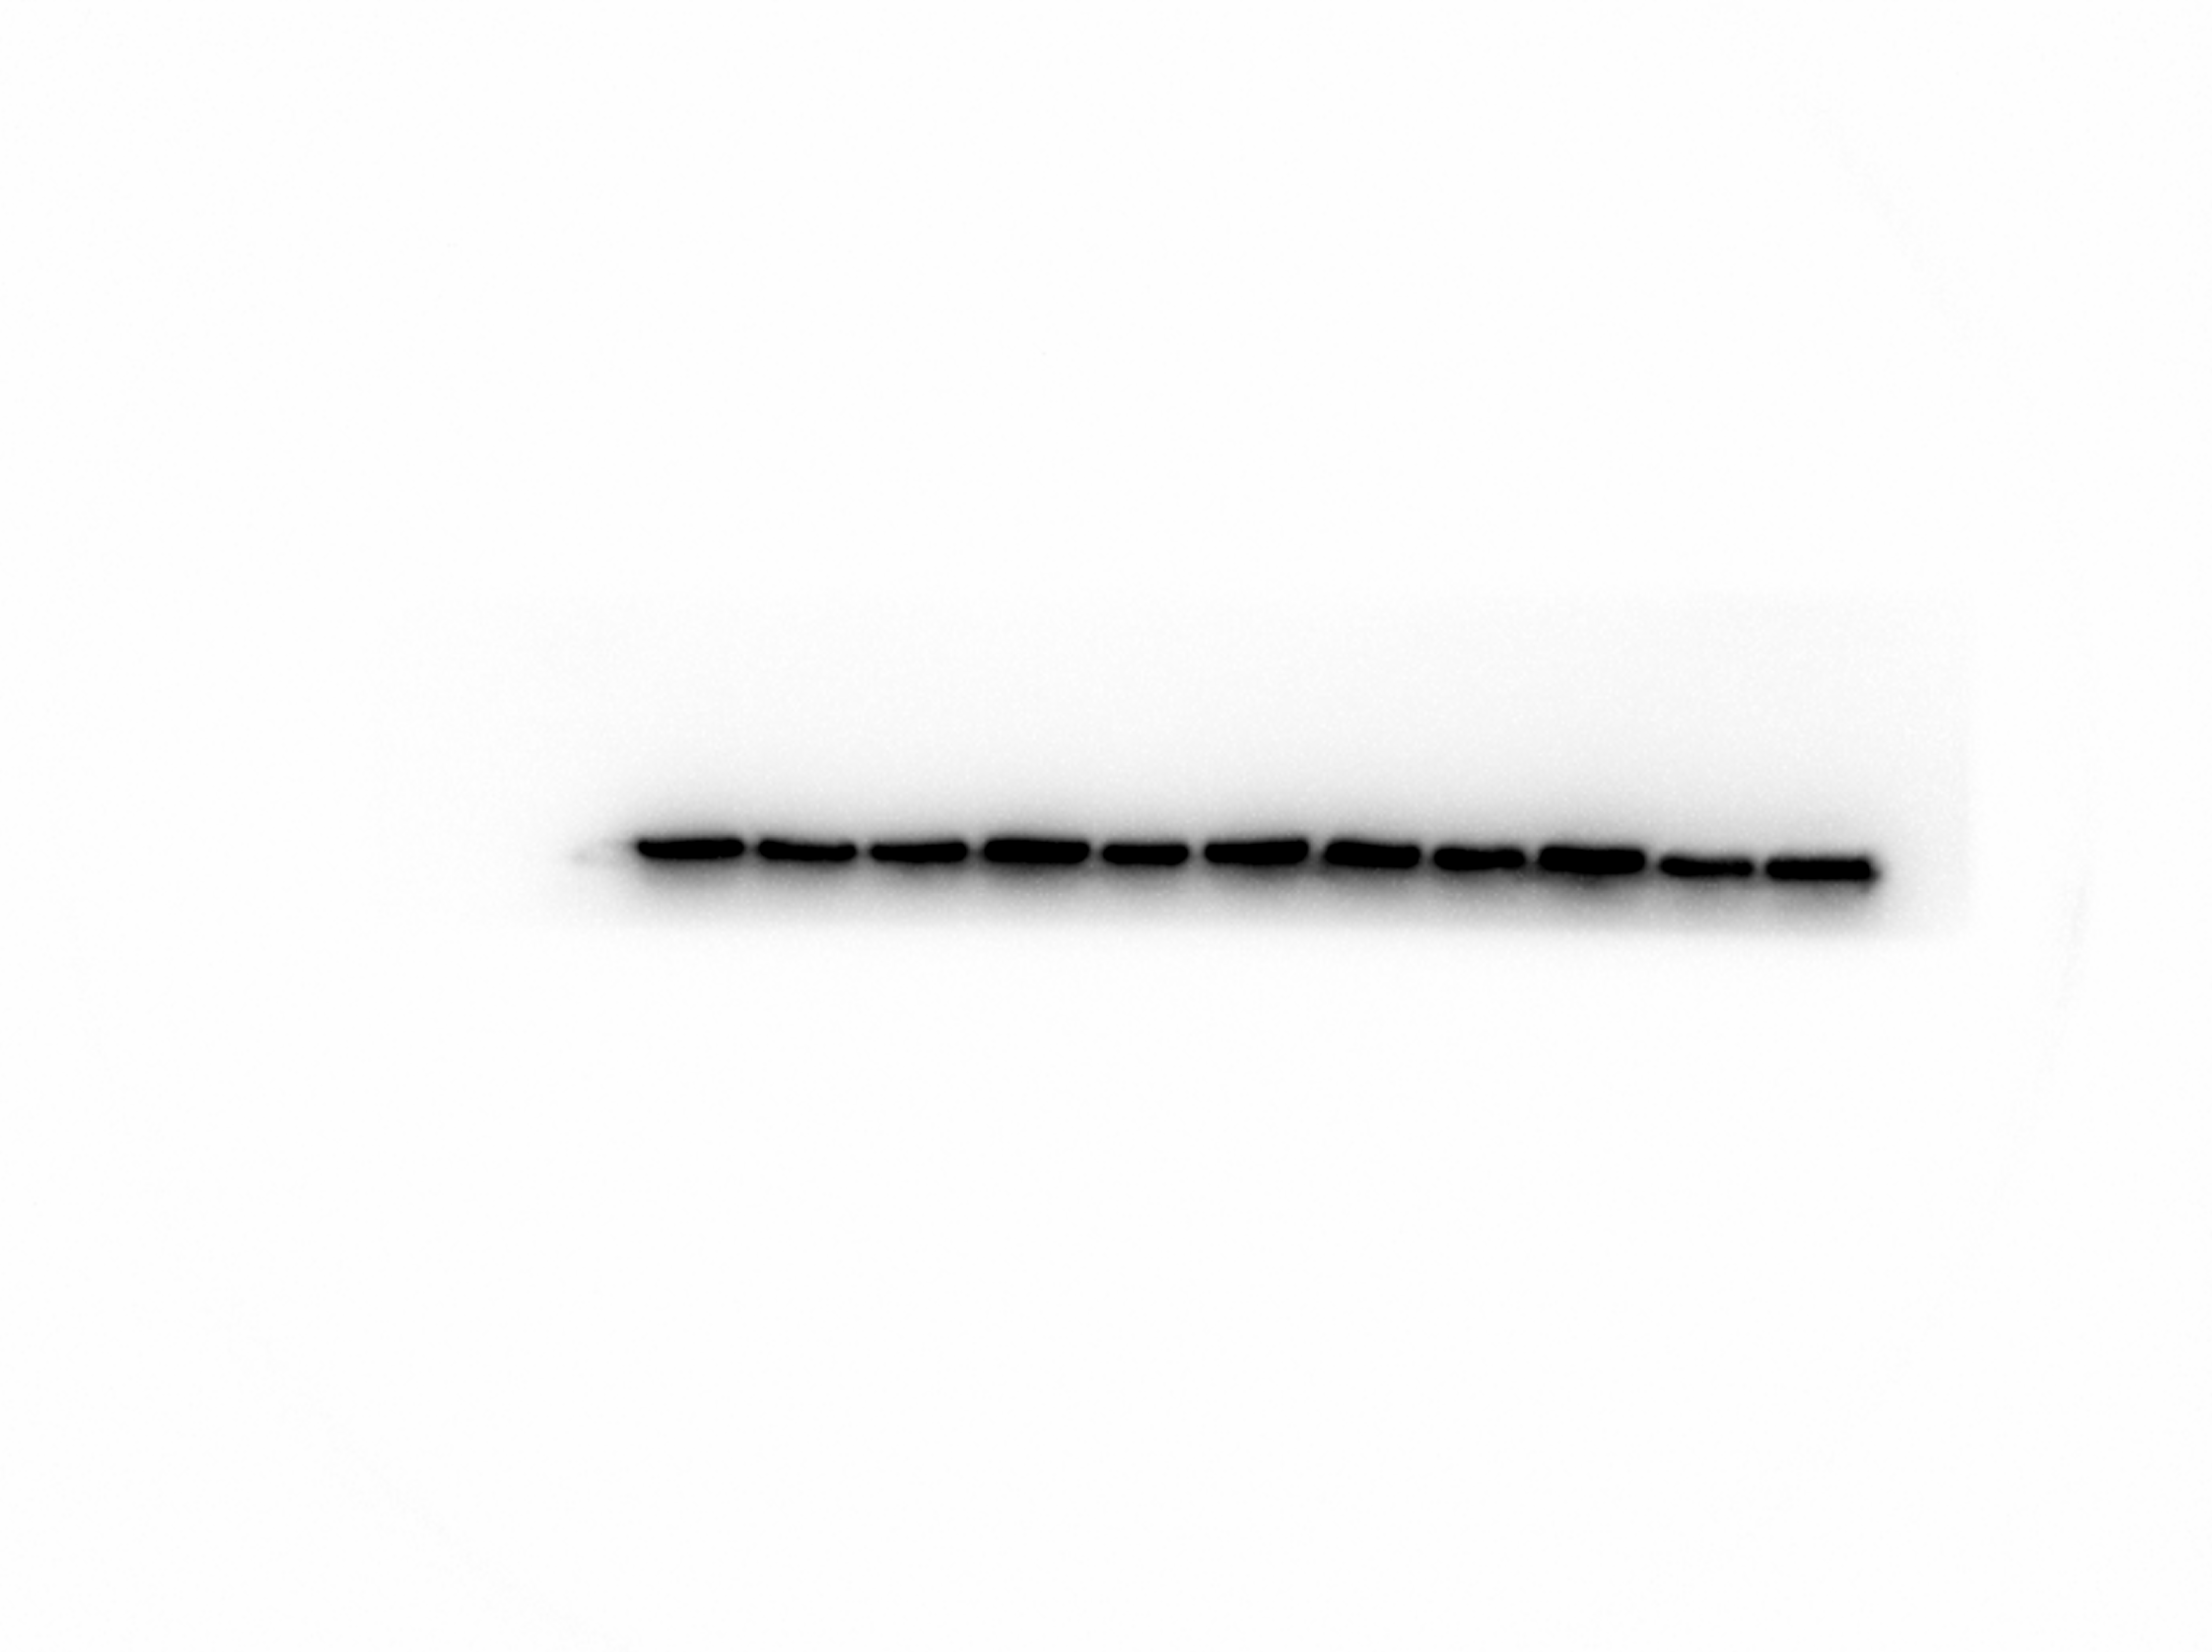

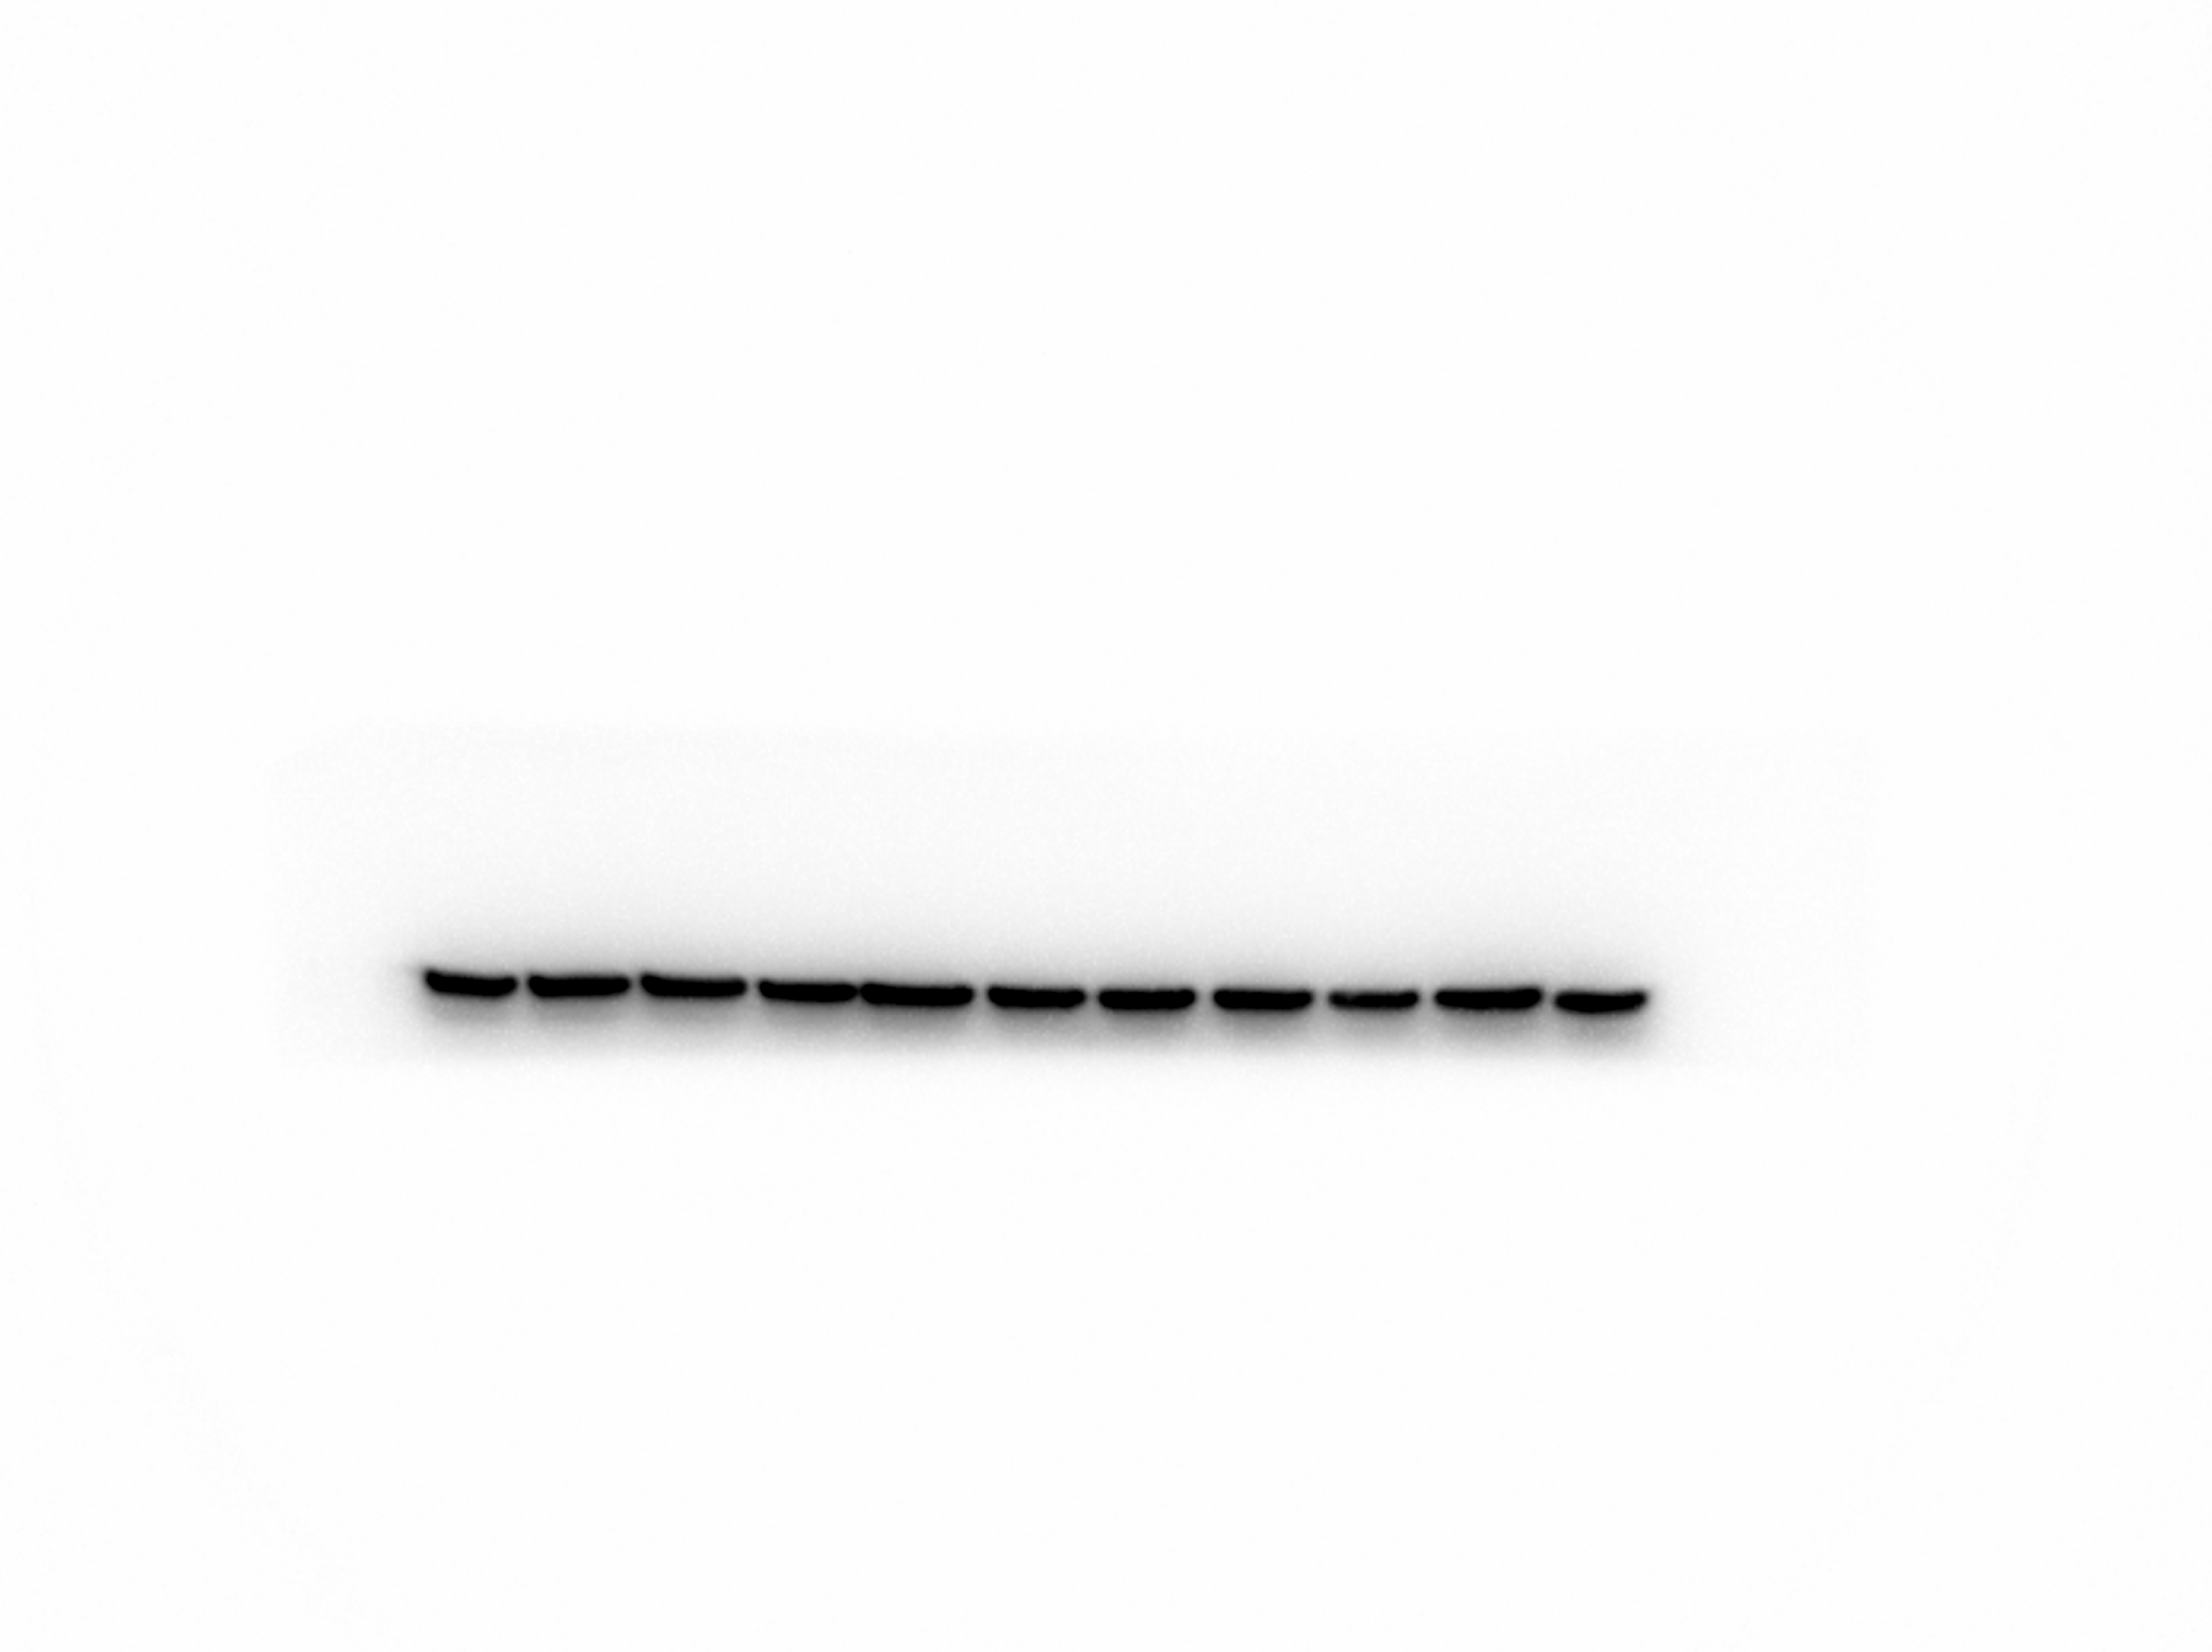

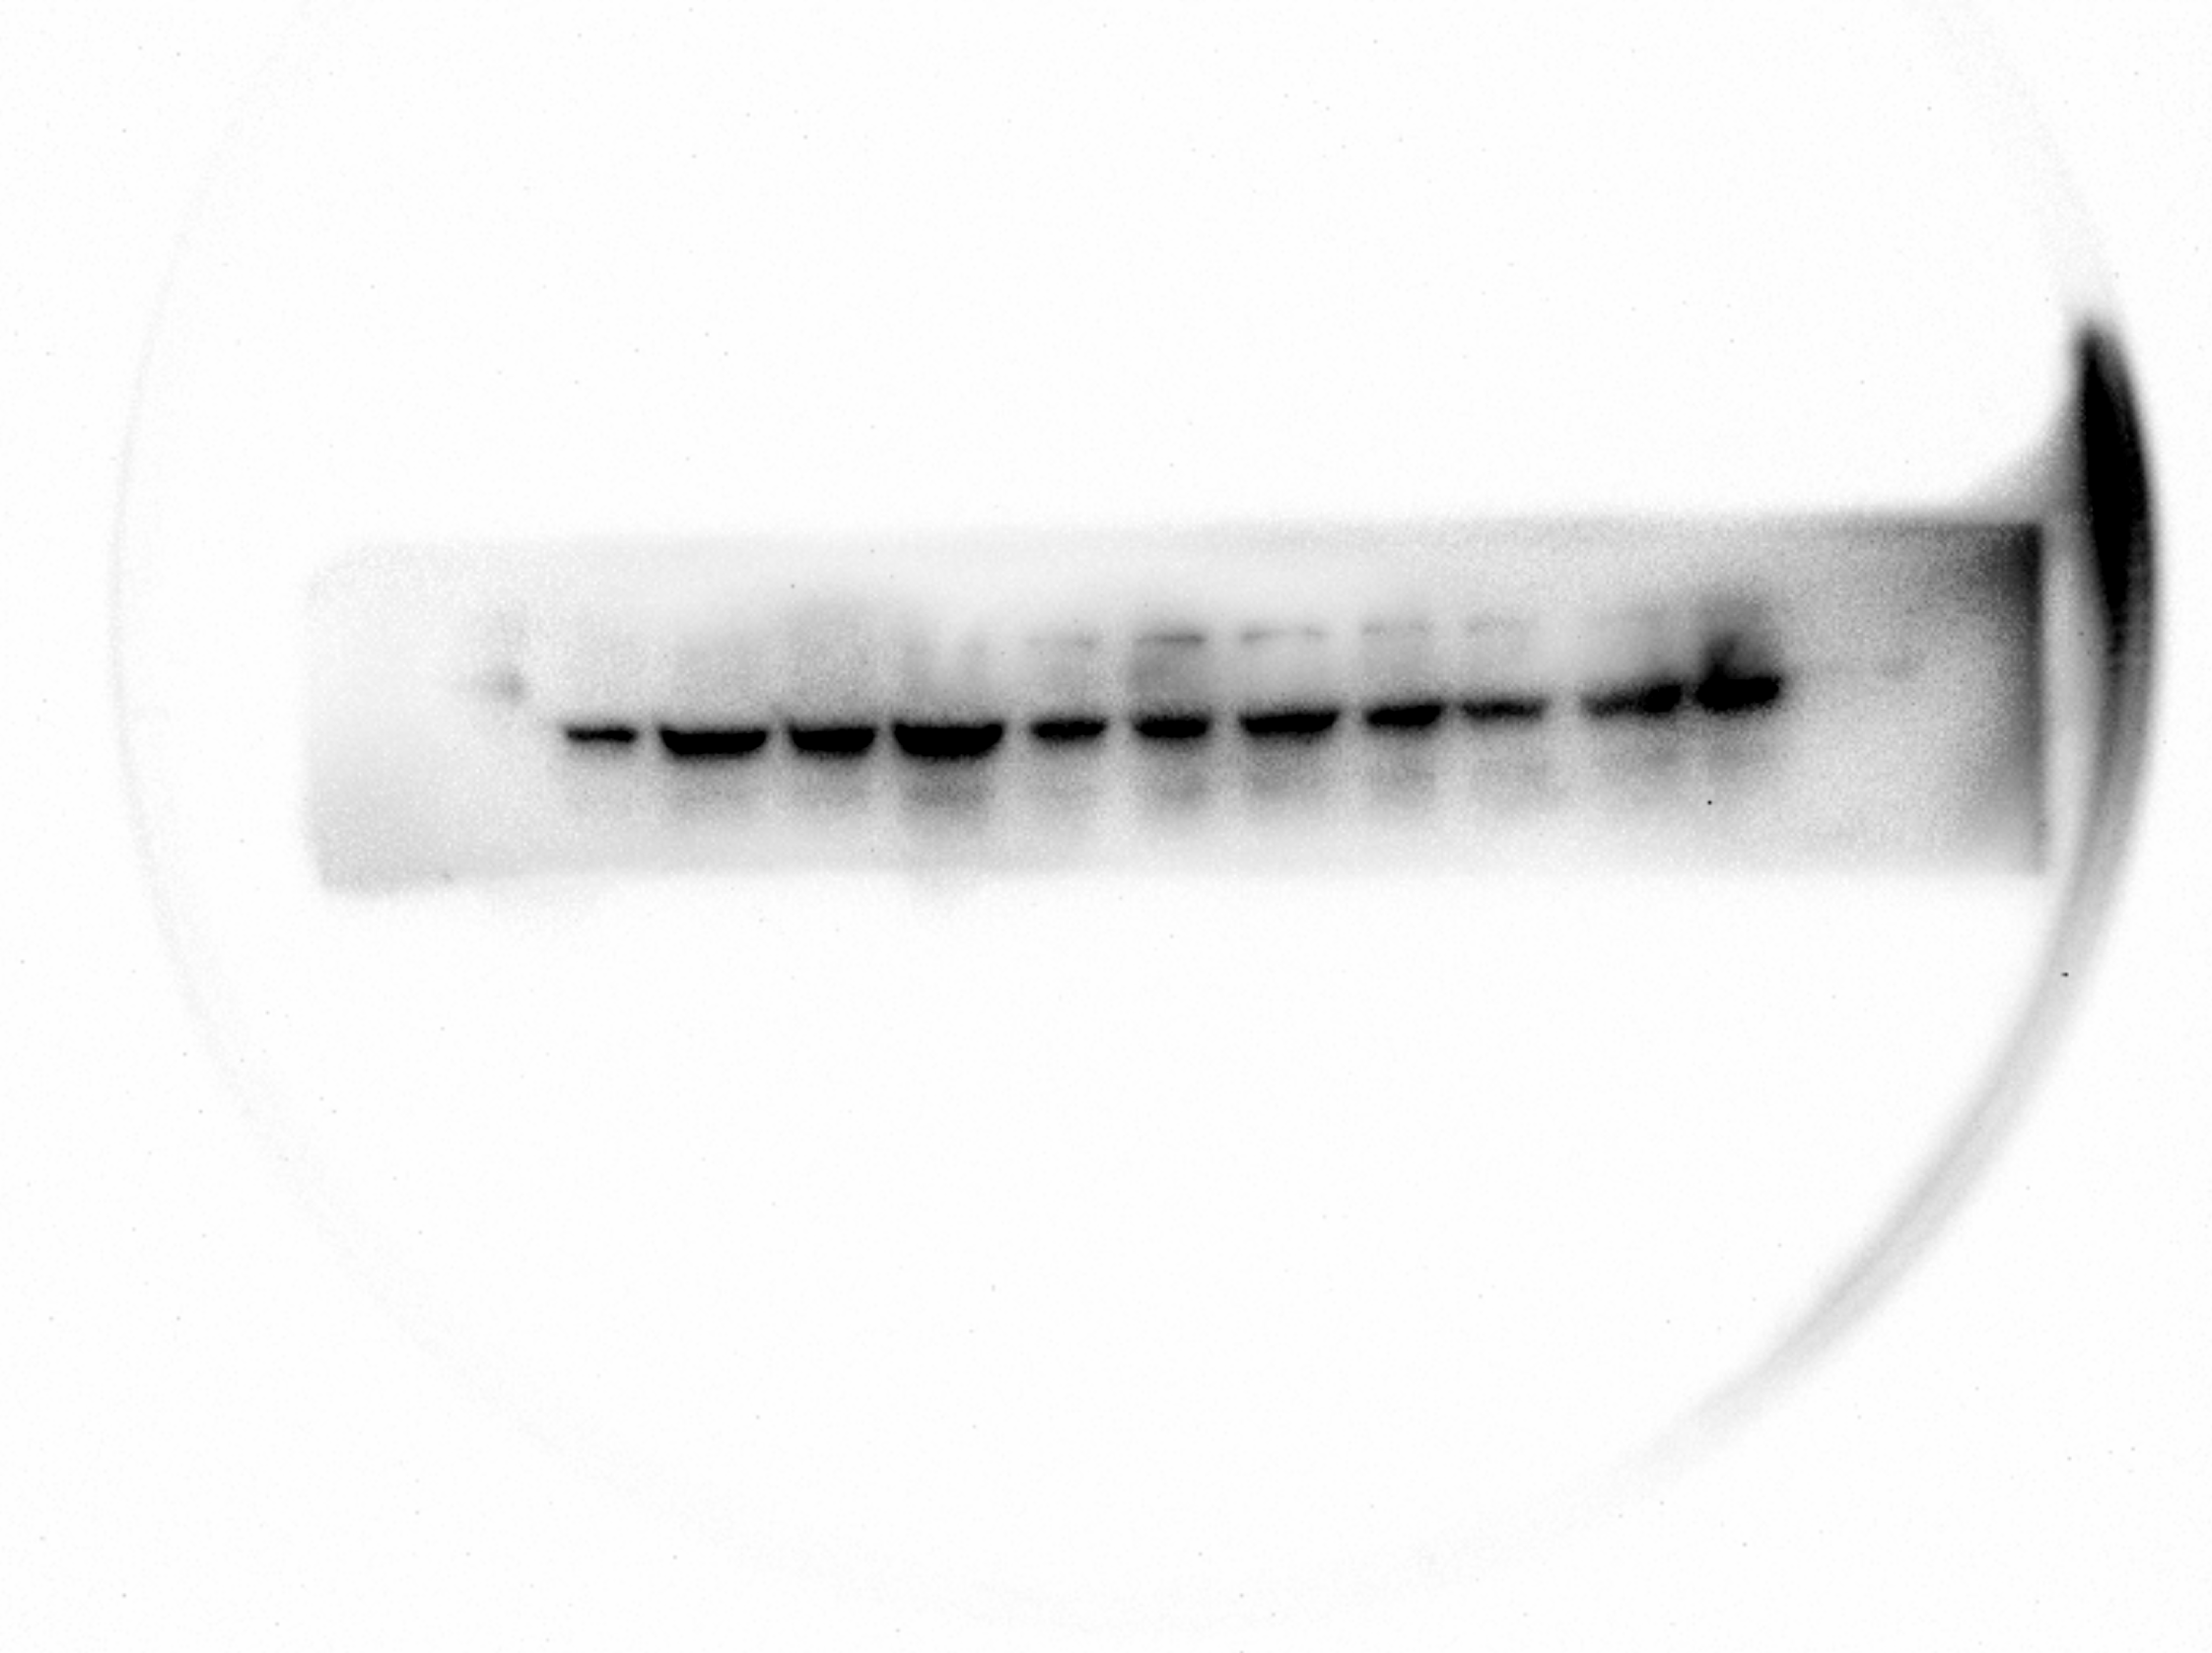

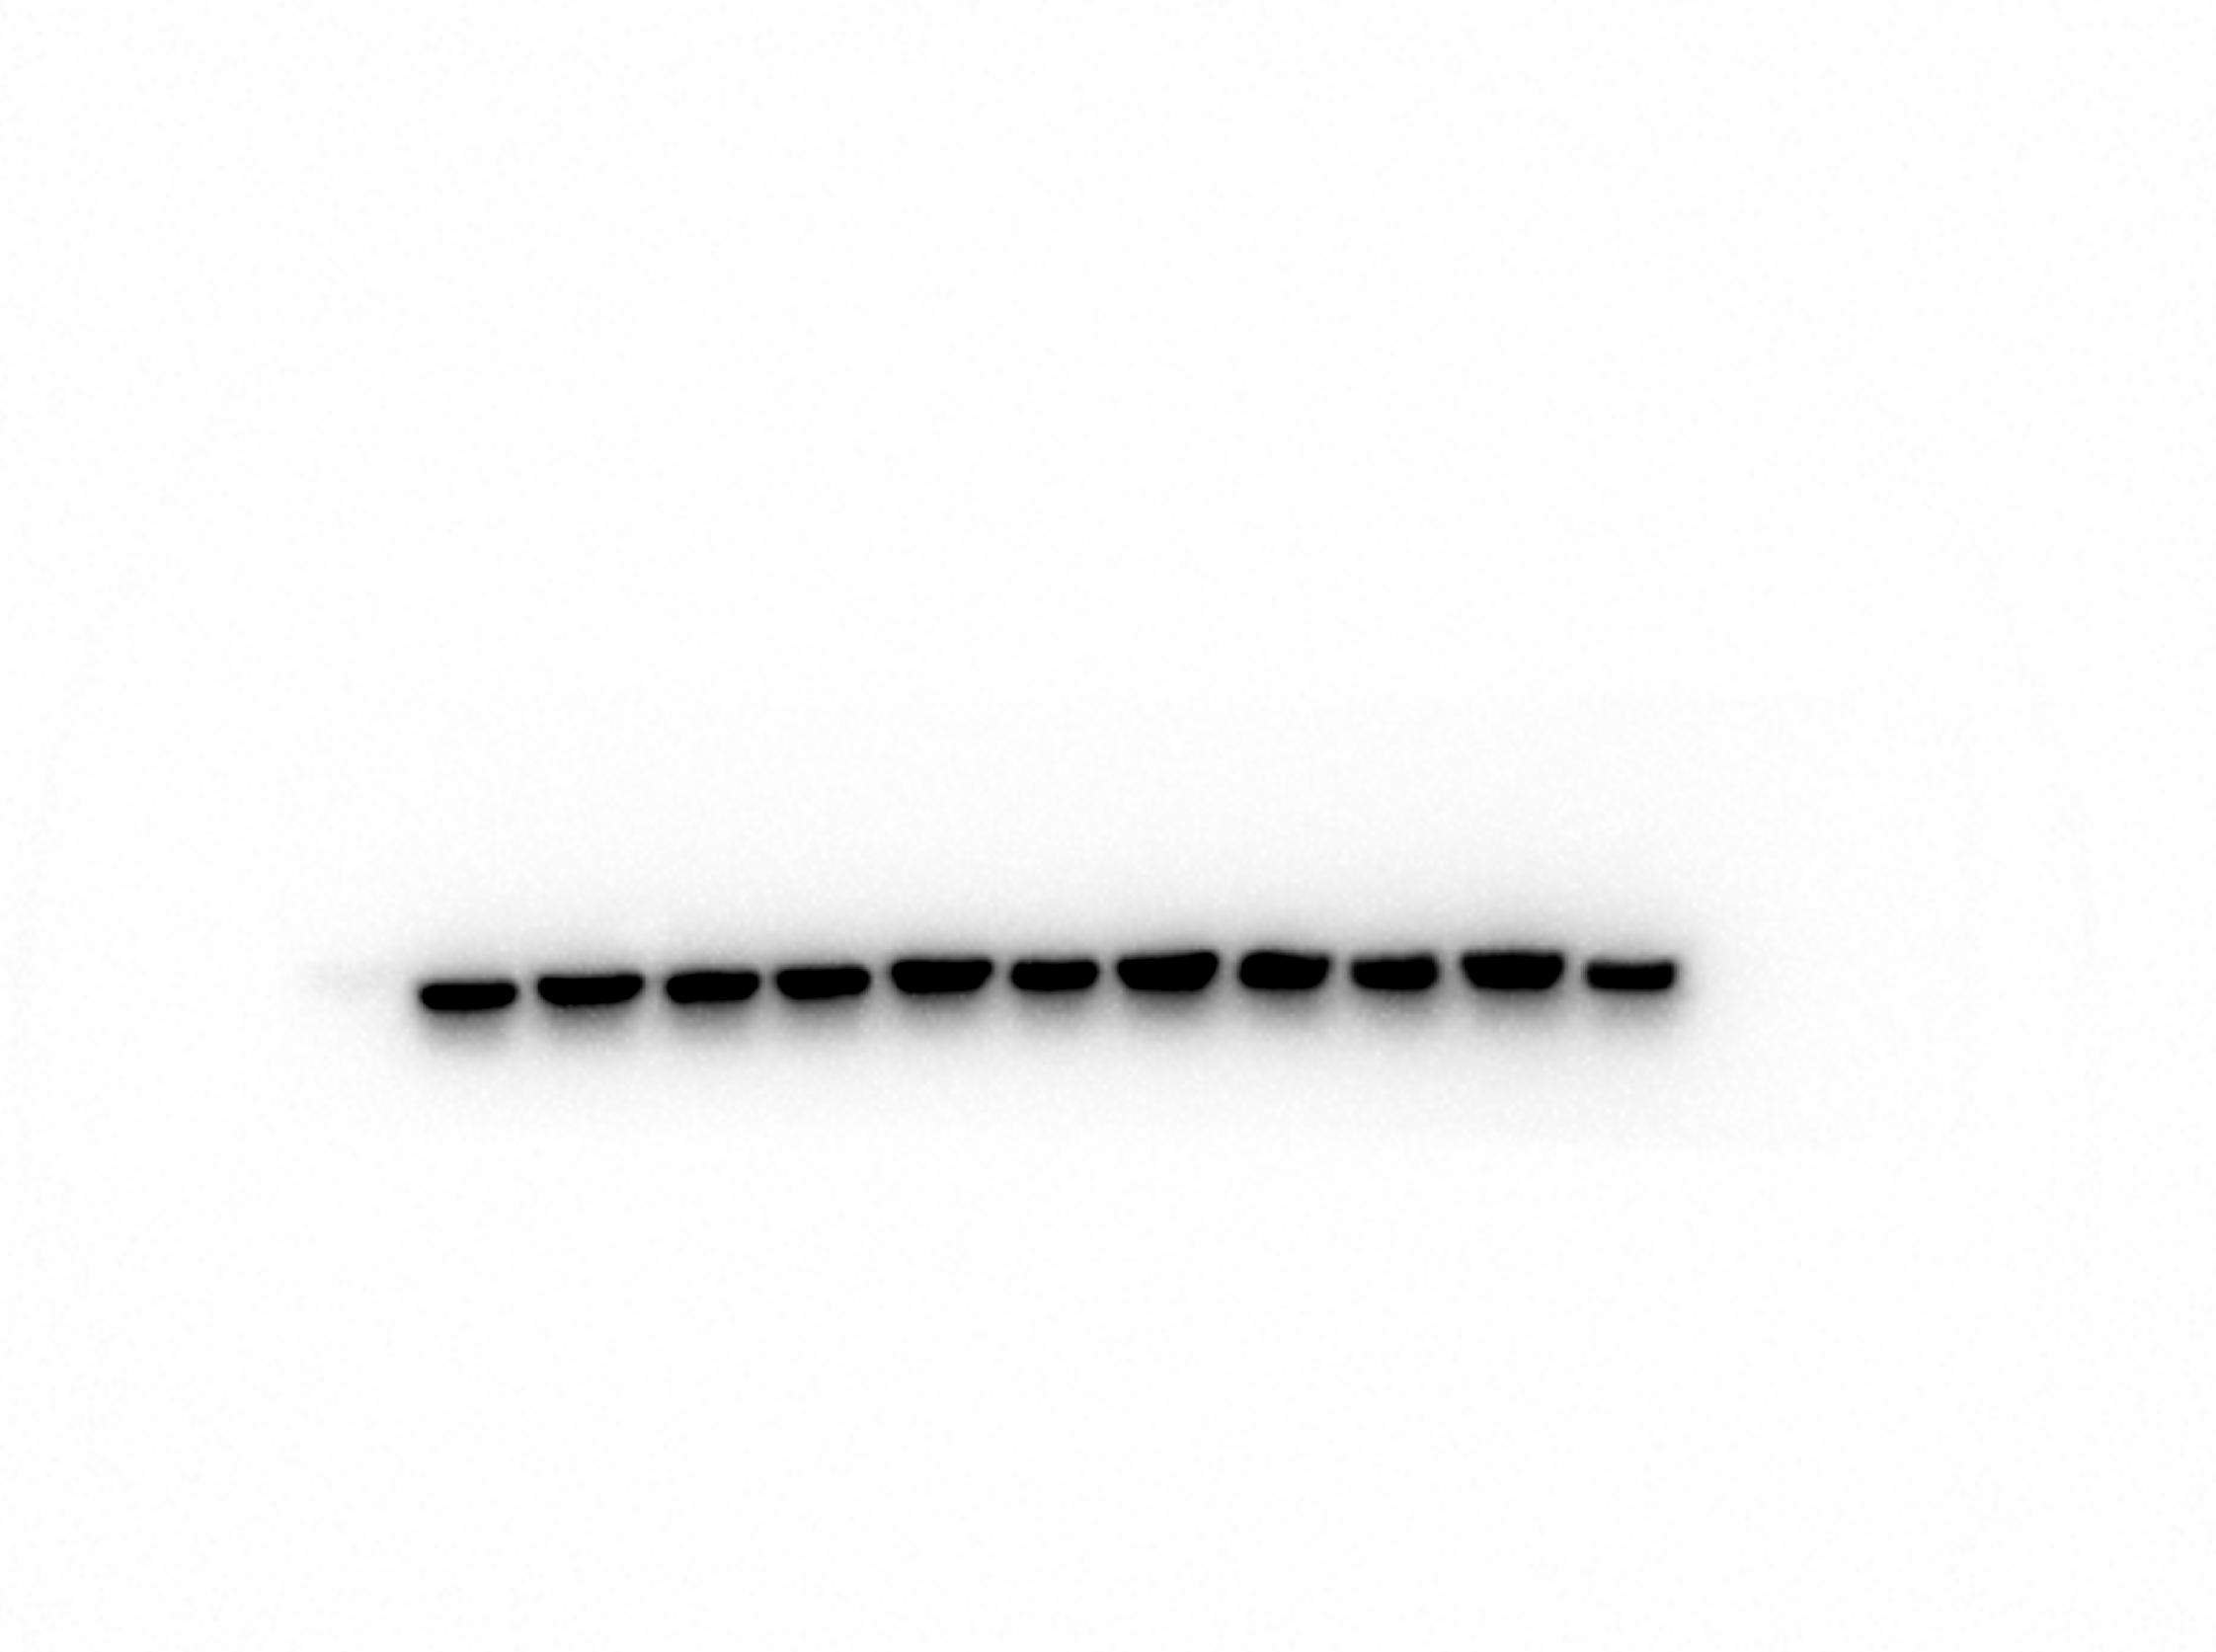

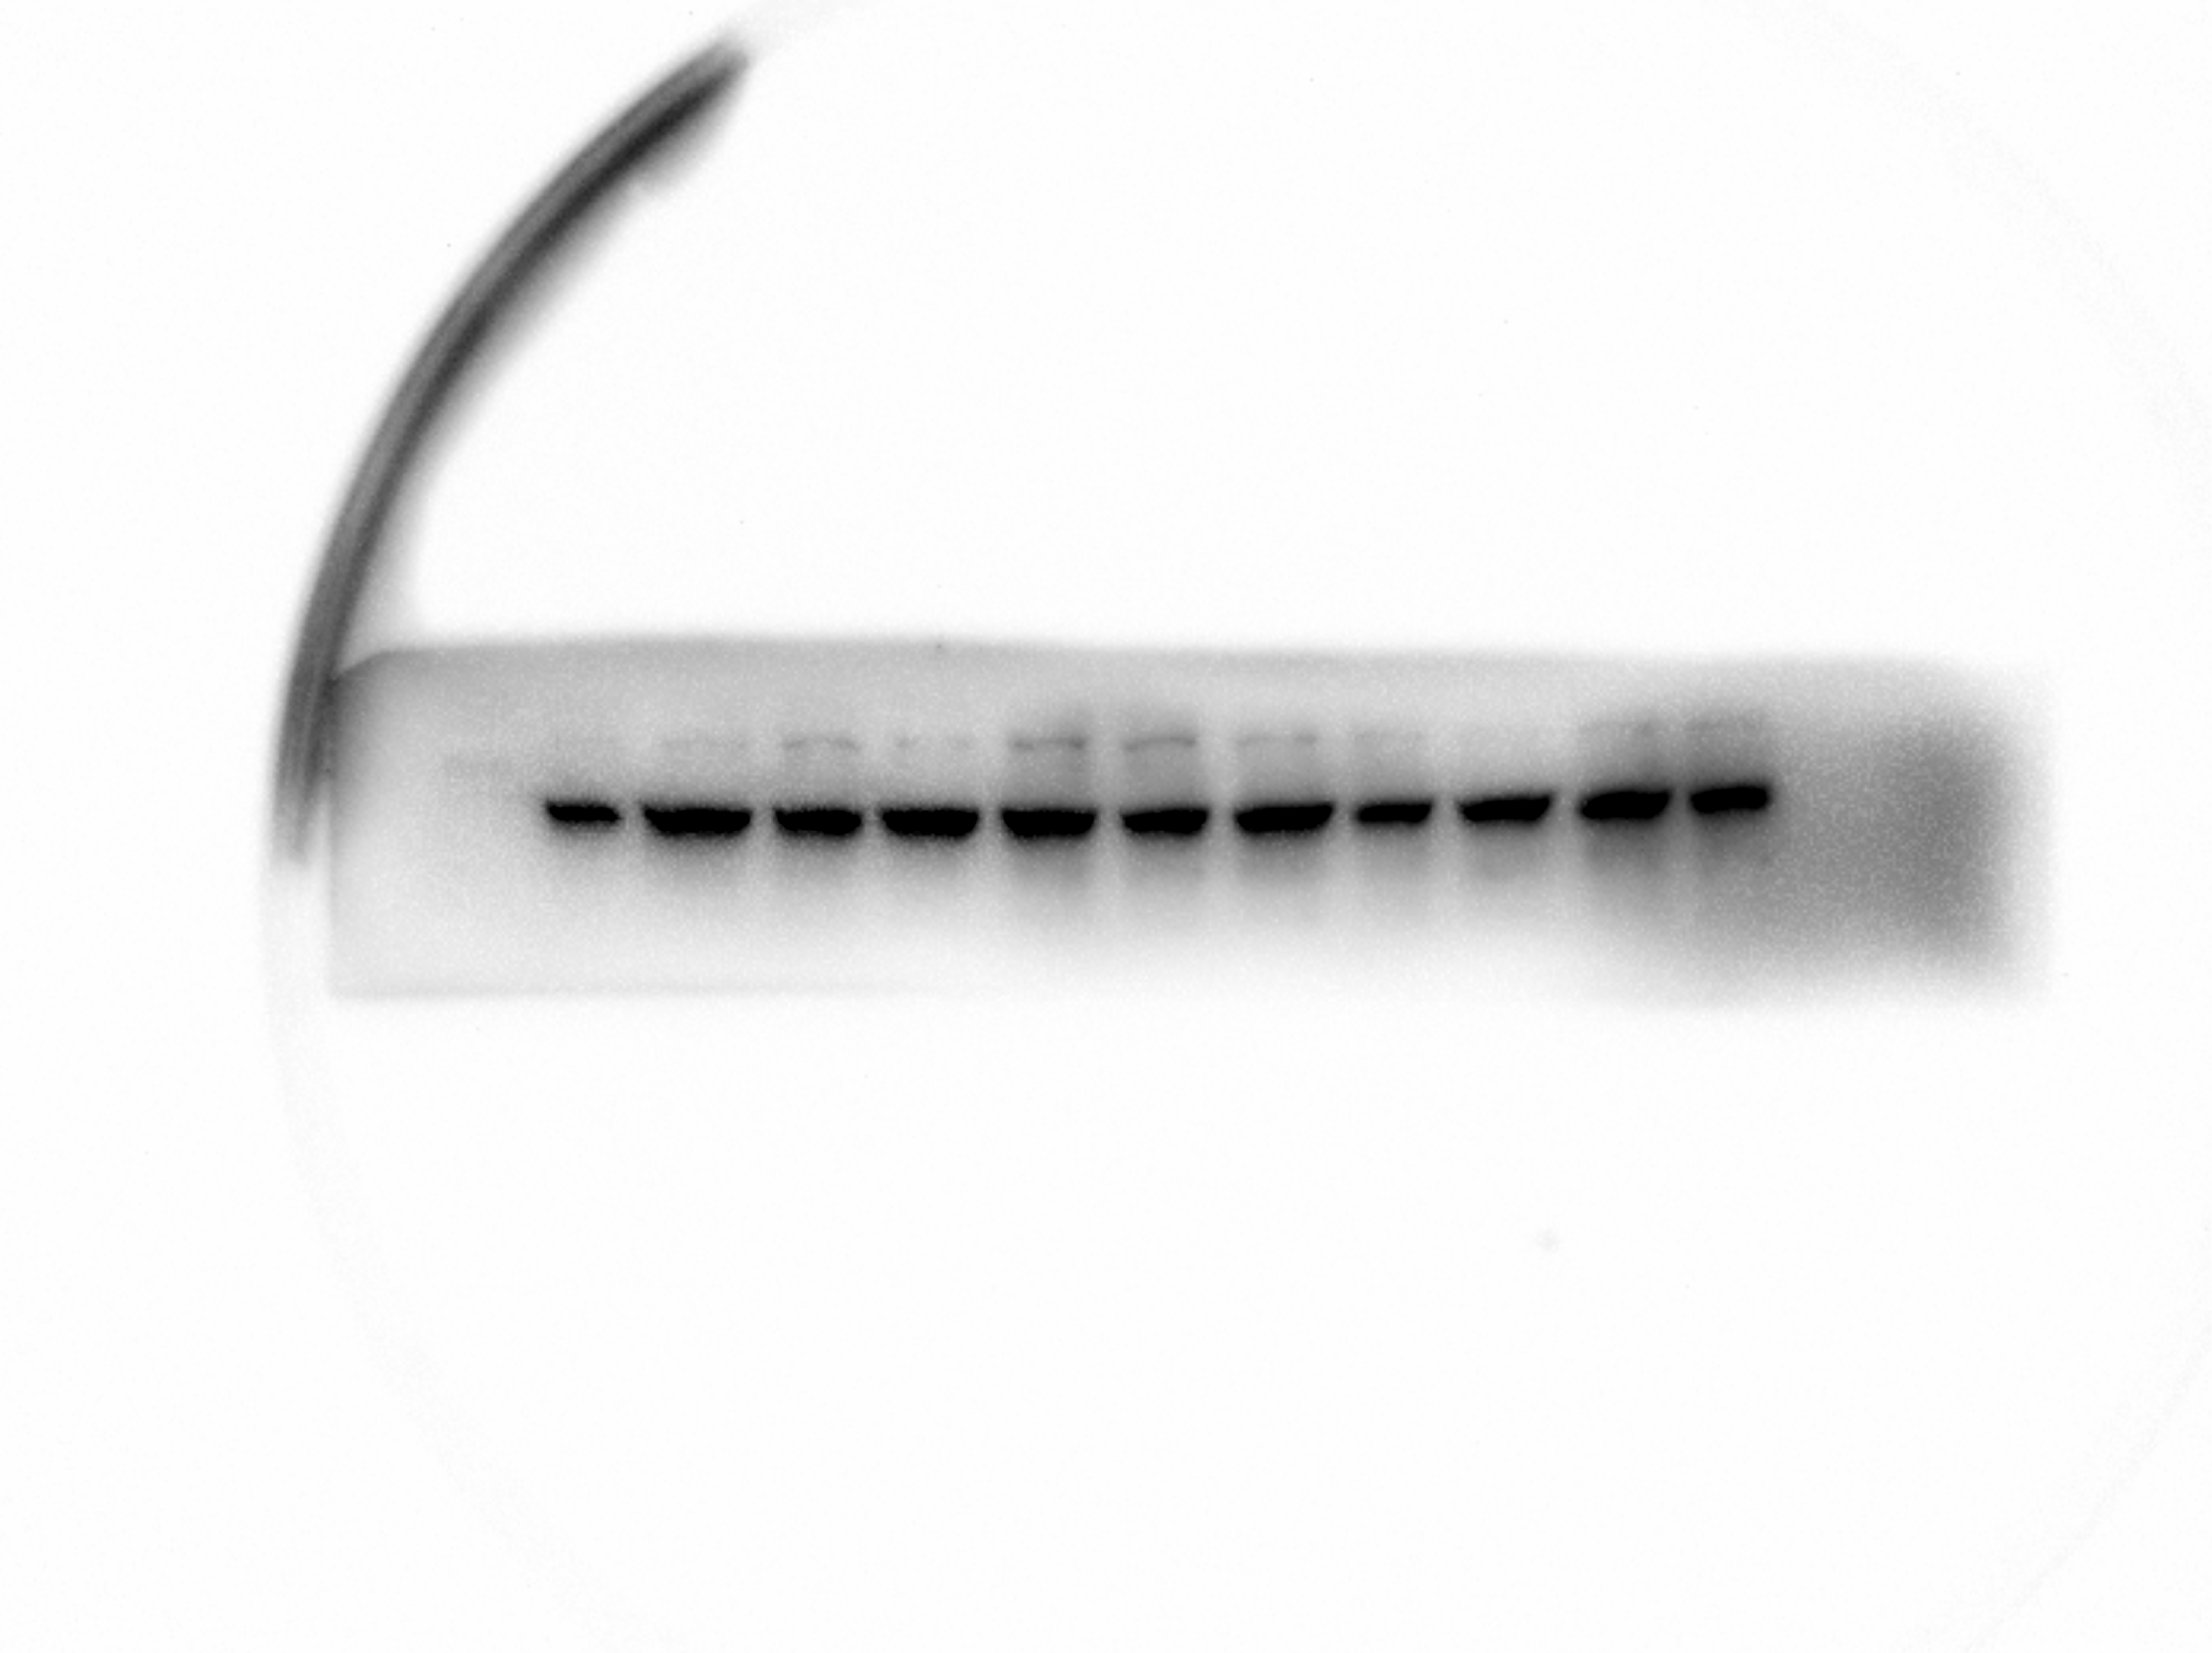

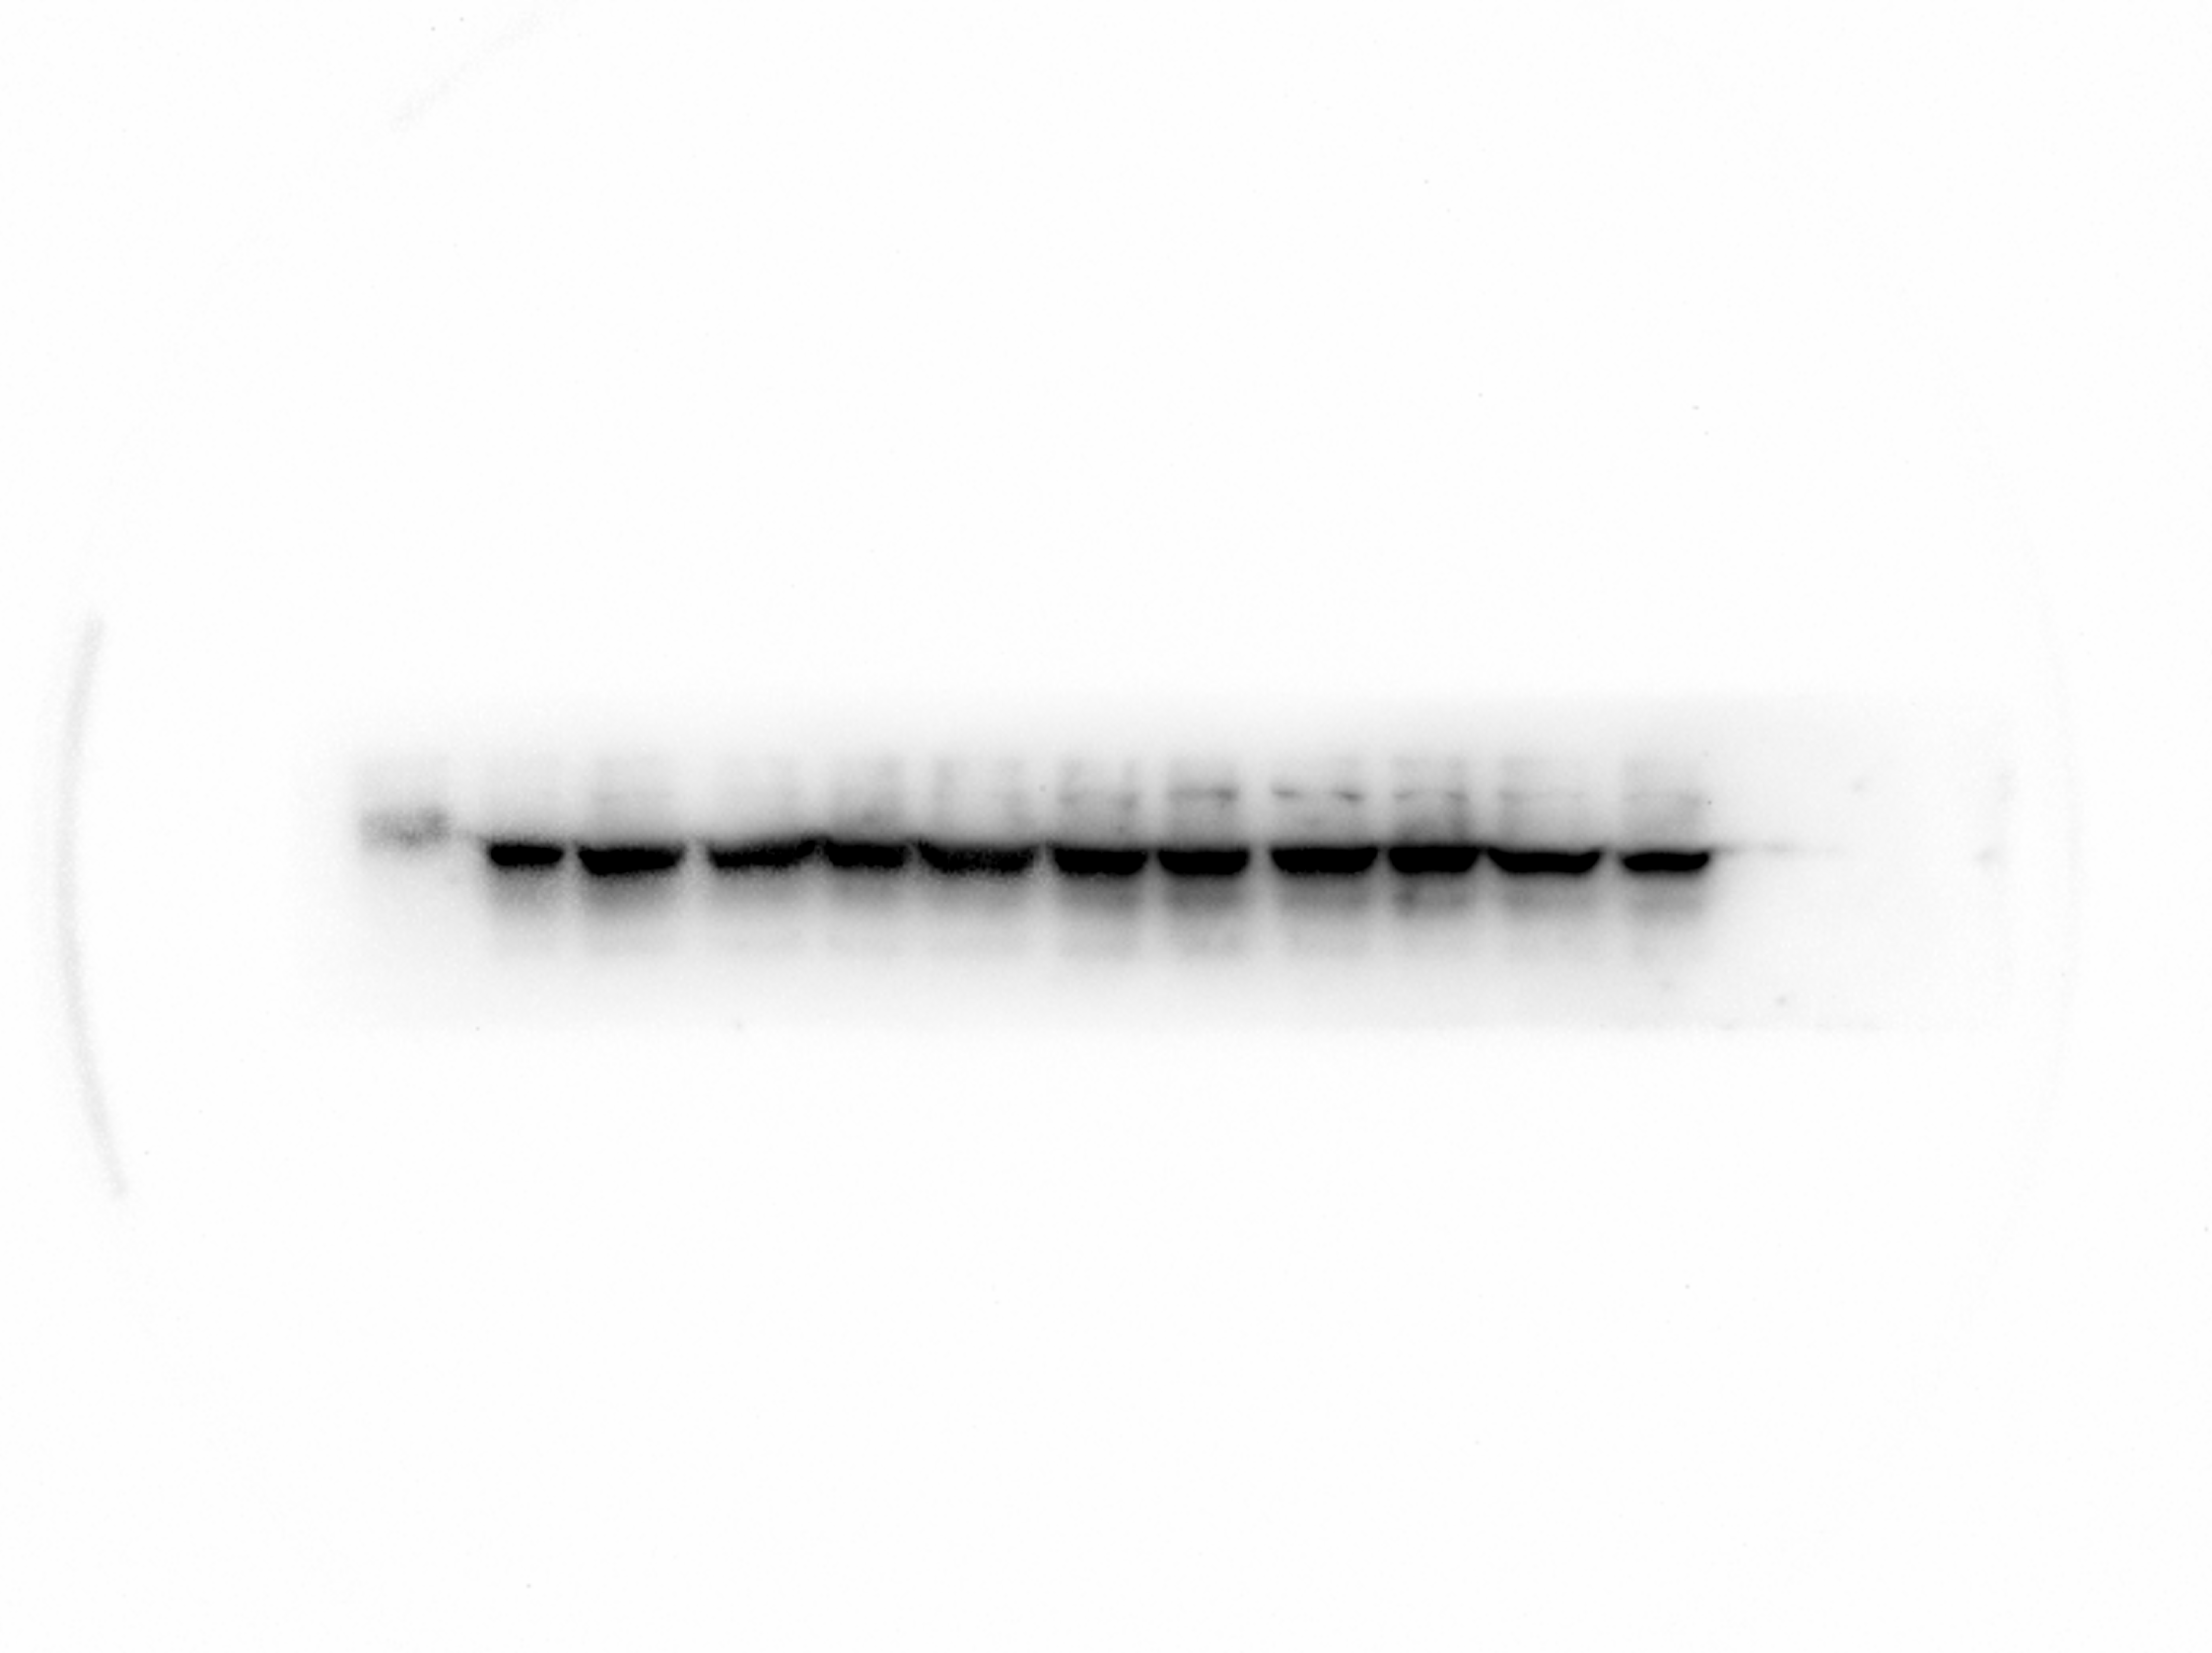


**Fig. 1**

1B ERLIN2

1B GAPDH

**Fig. 1**

1E ERLIN2

1E GAPDH


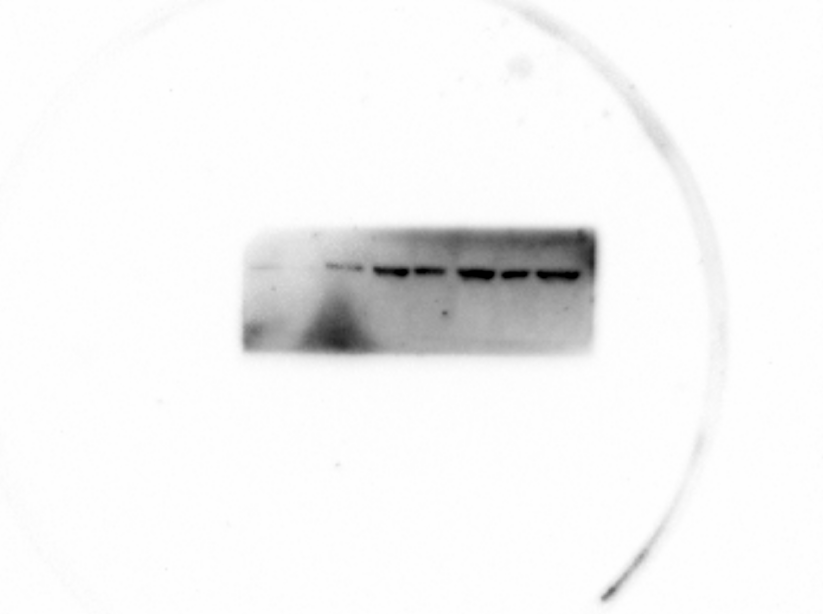

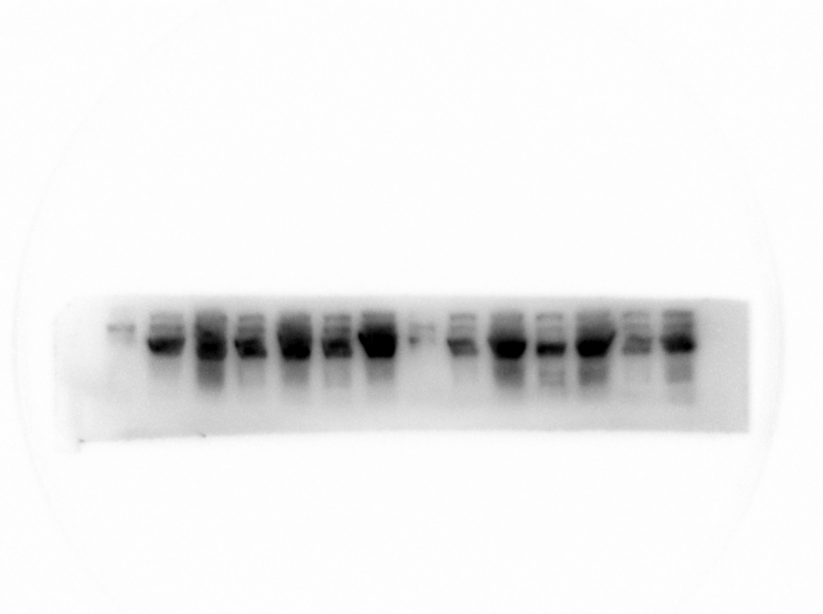


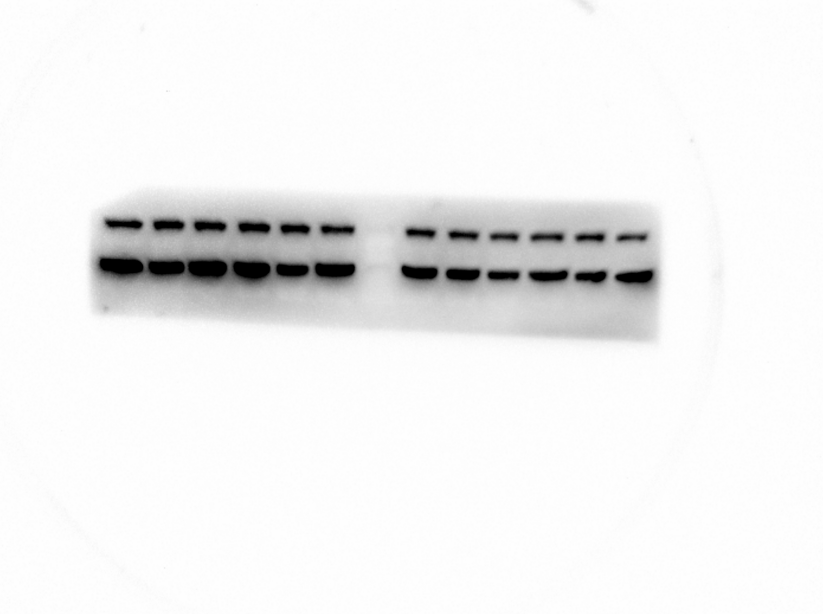

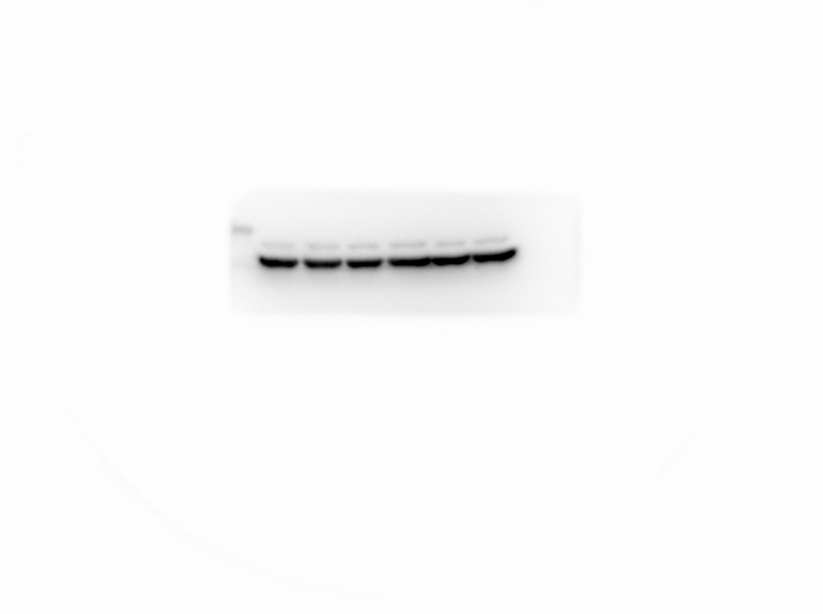


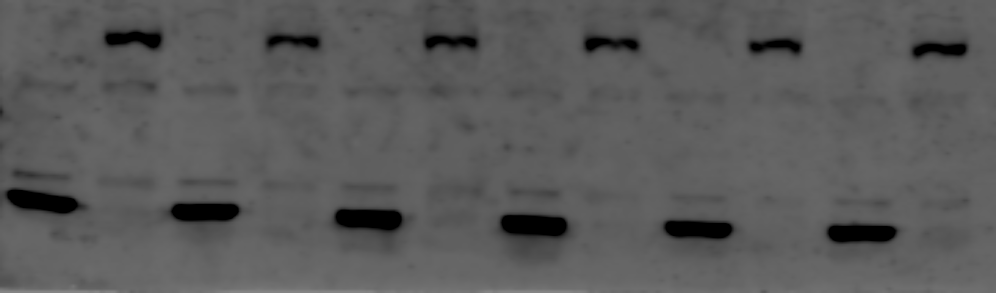


**Fig. 2**

2A GFP-ERLIN2

2A GAPDH


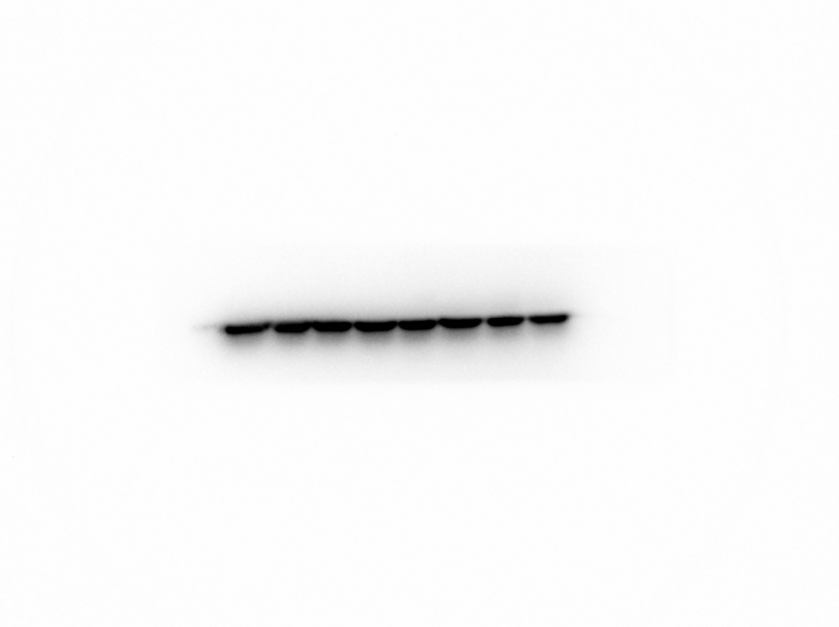


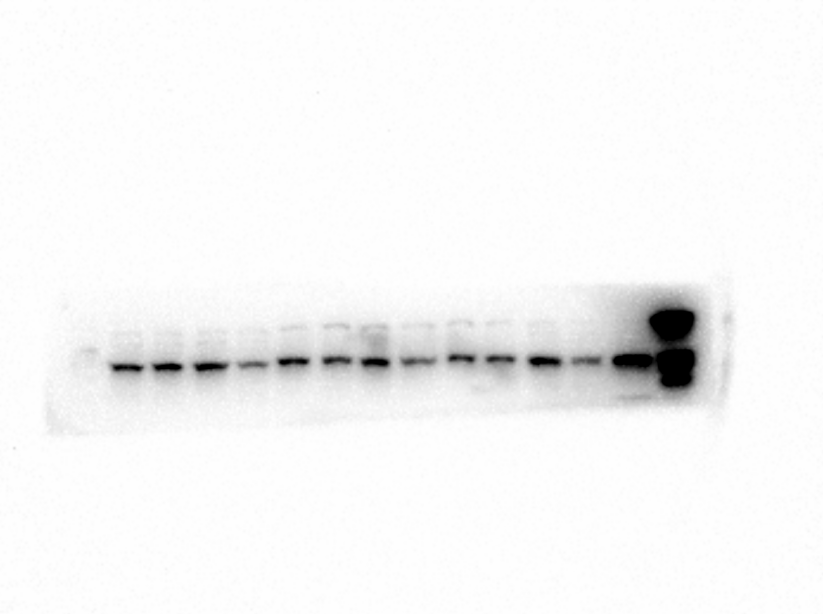

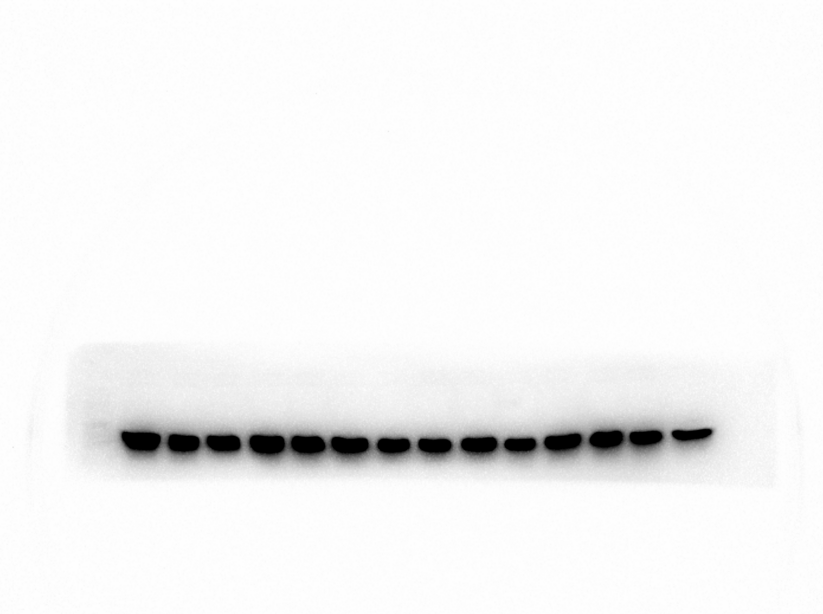


**Fig. 2**

2B KD-ERLIN2

2B GAPDH


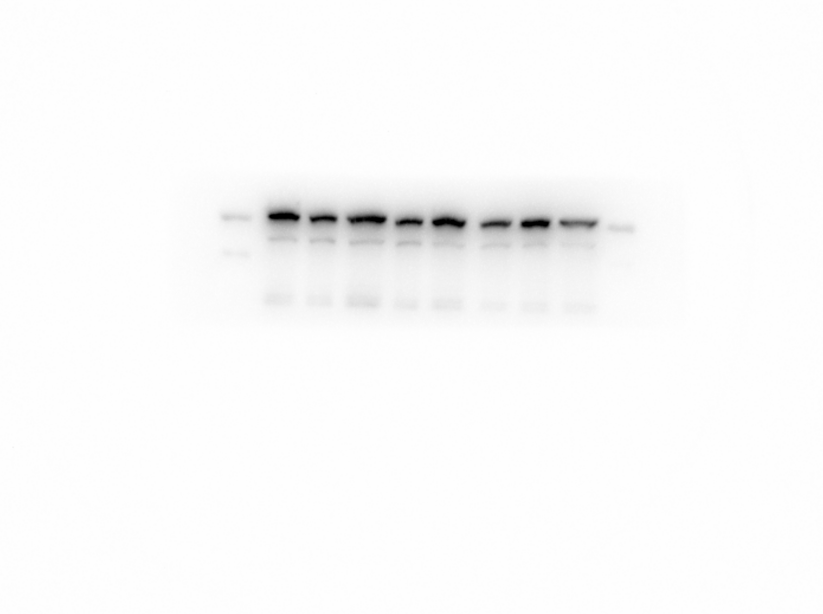

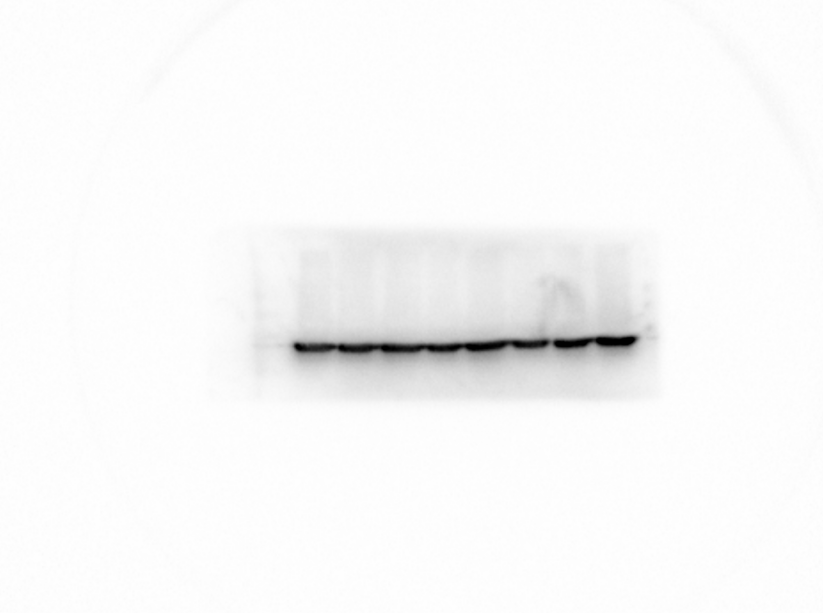


**Fig. 3**

3A GFP-ERLIN2

3A GAPDH


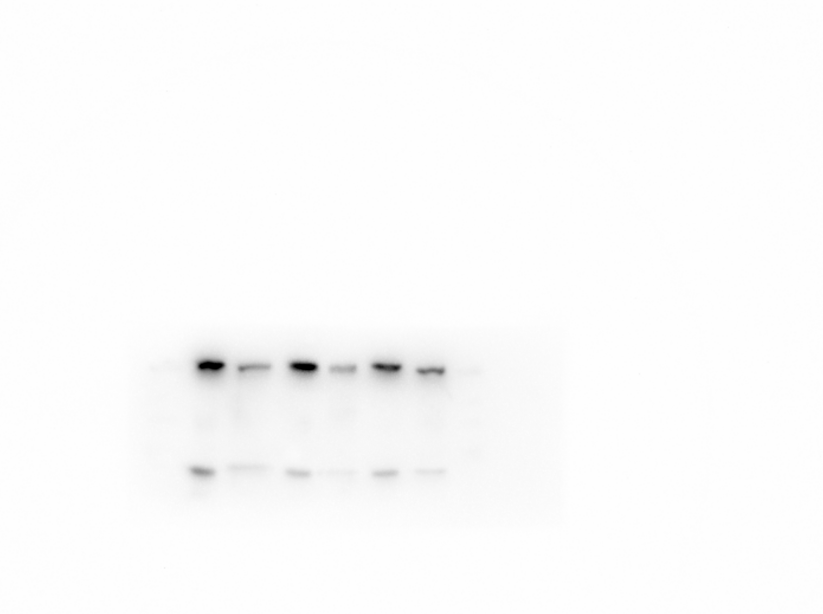

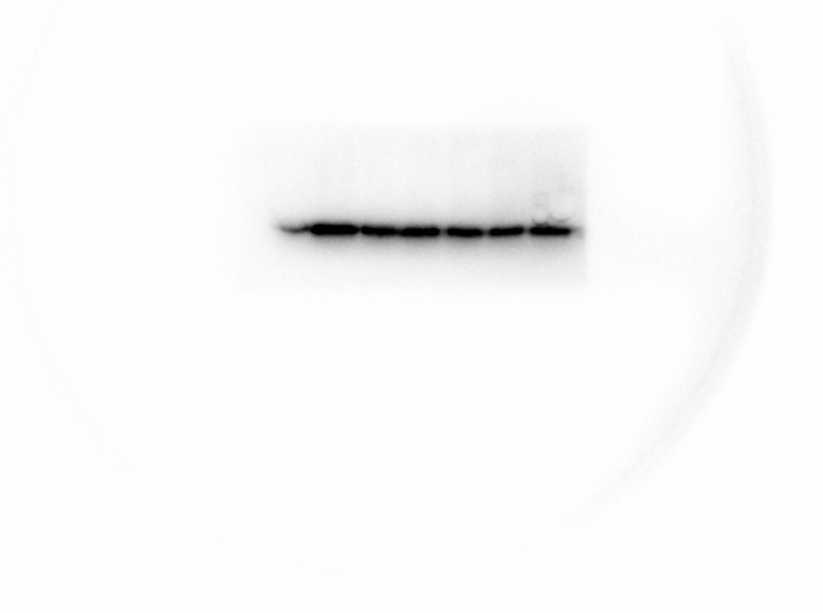


**Fig. 3**

3B GFP-ERLIN2

3B GAPDH


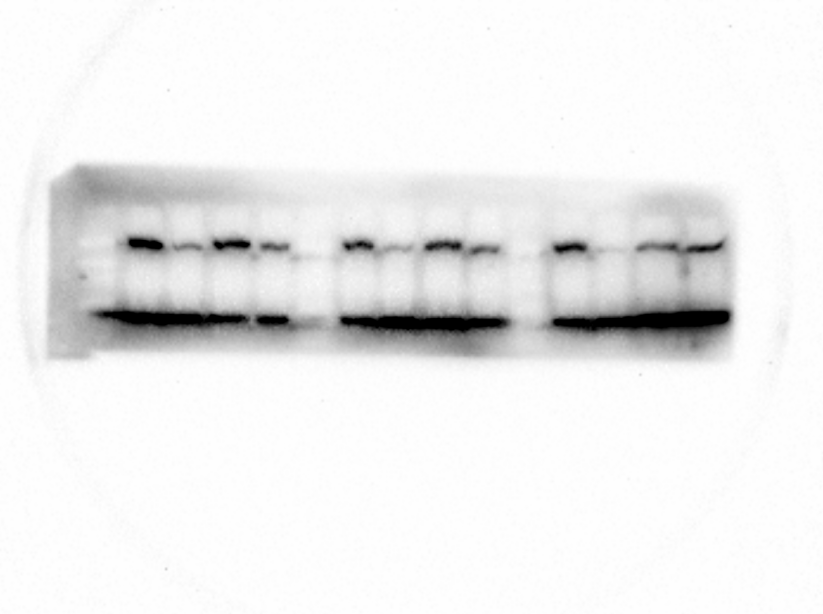

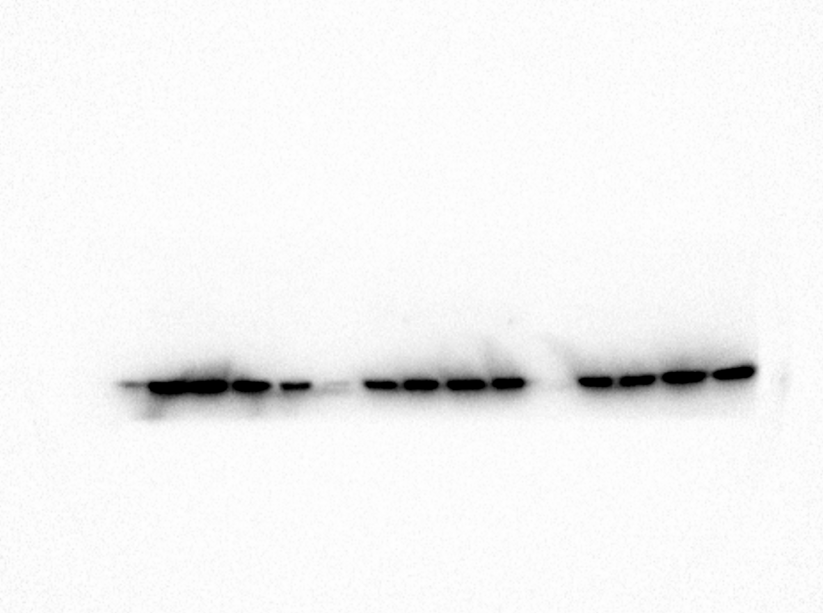


**Fig. 3**

3E GFP-ERLIN2

3E GAPDH

**Fig. 3**

3F GFP-ERLIN2

3F GAPDH


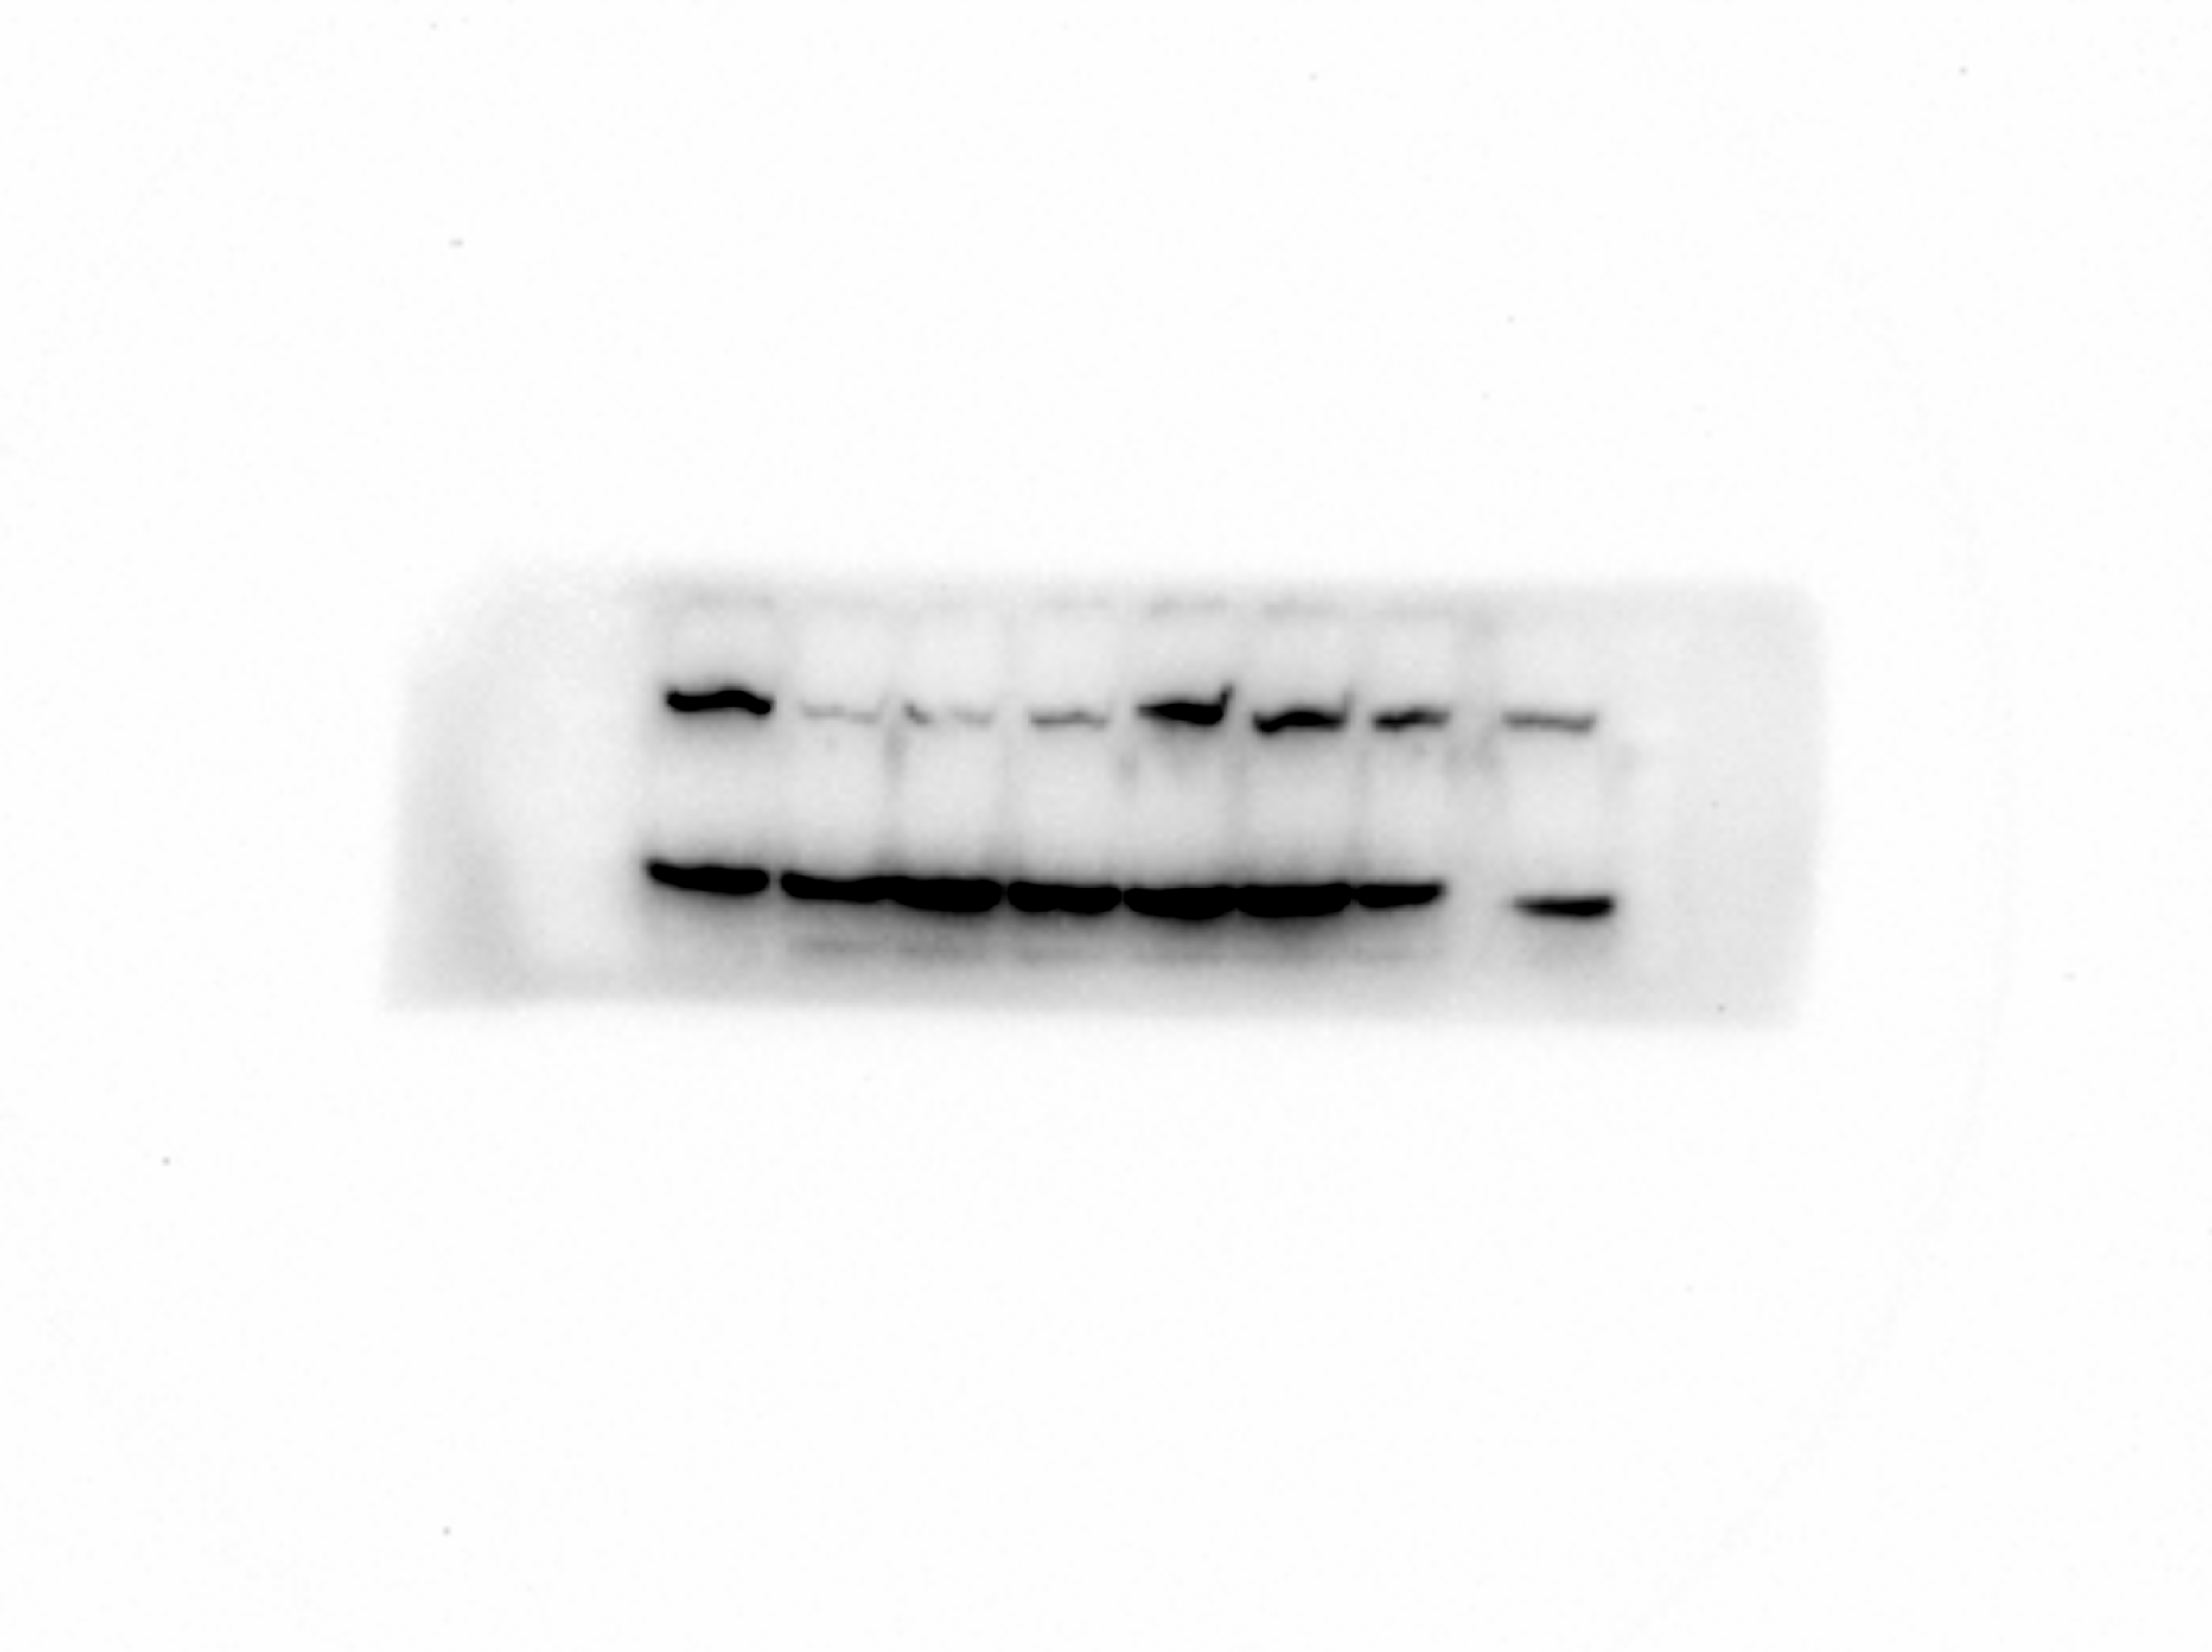

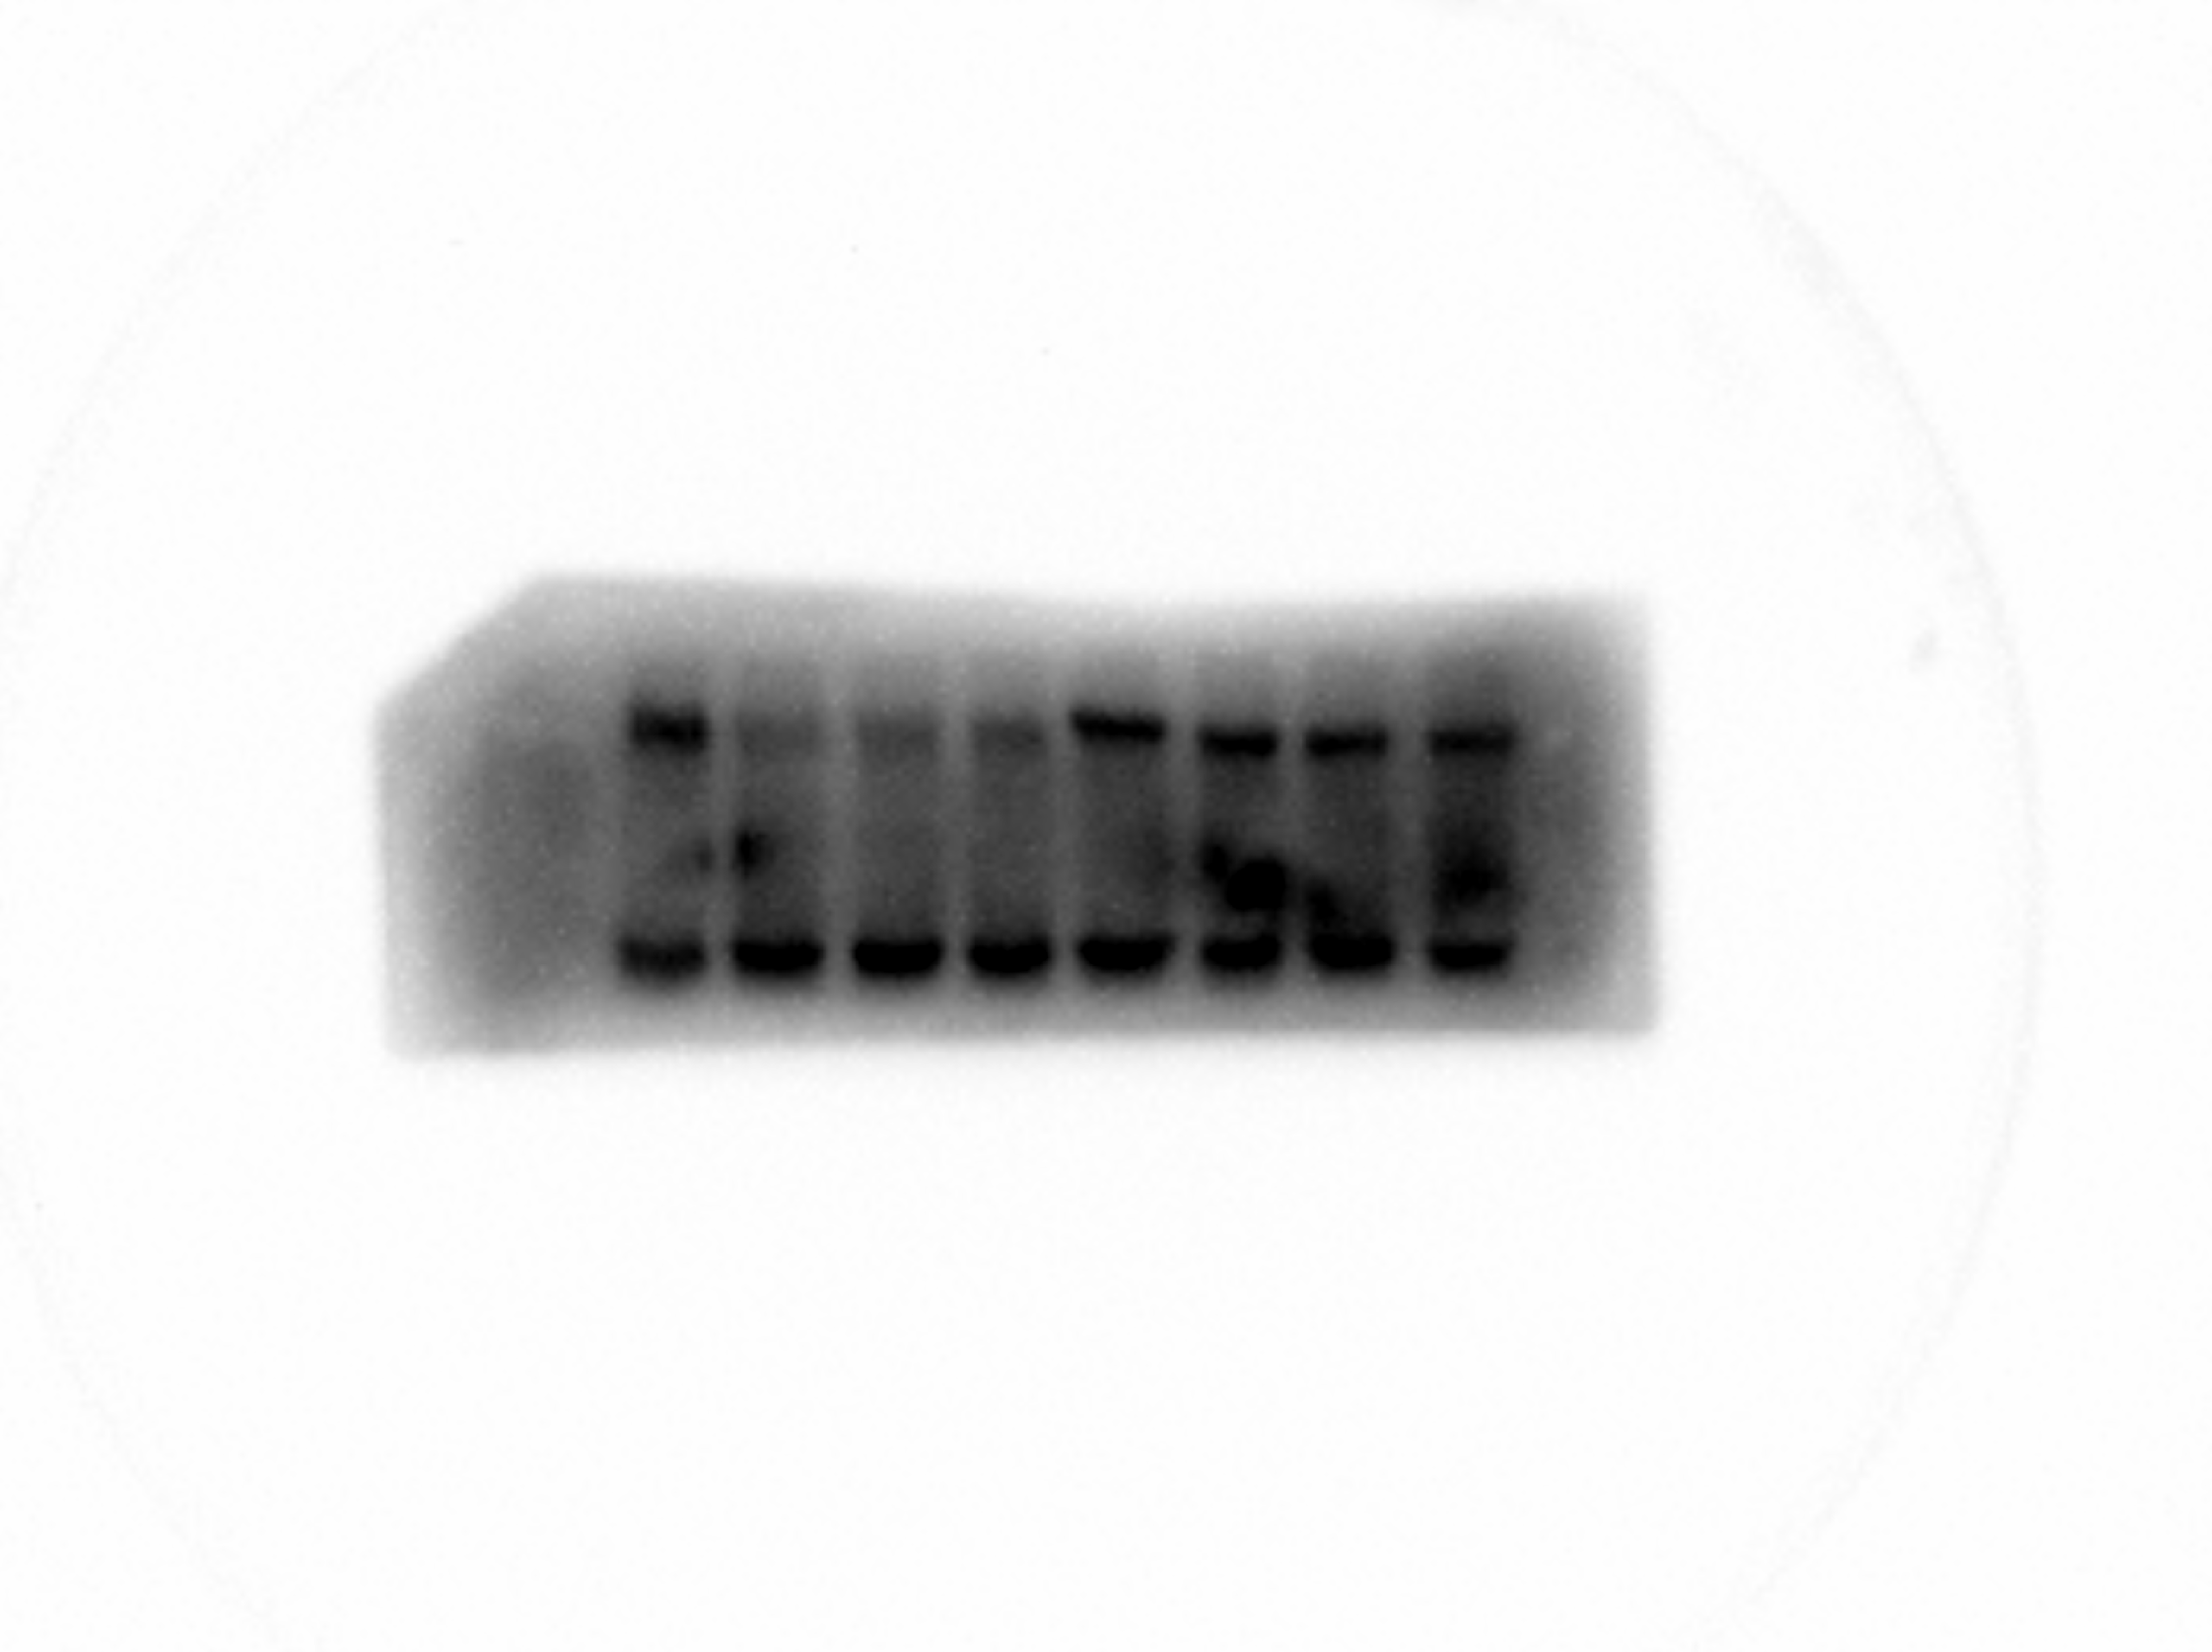

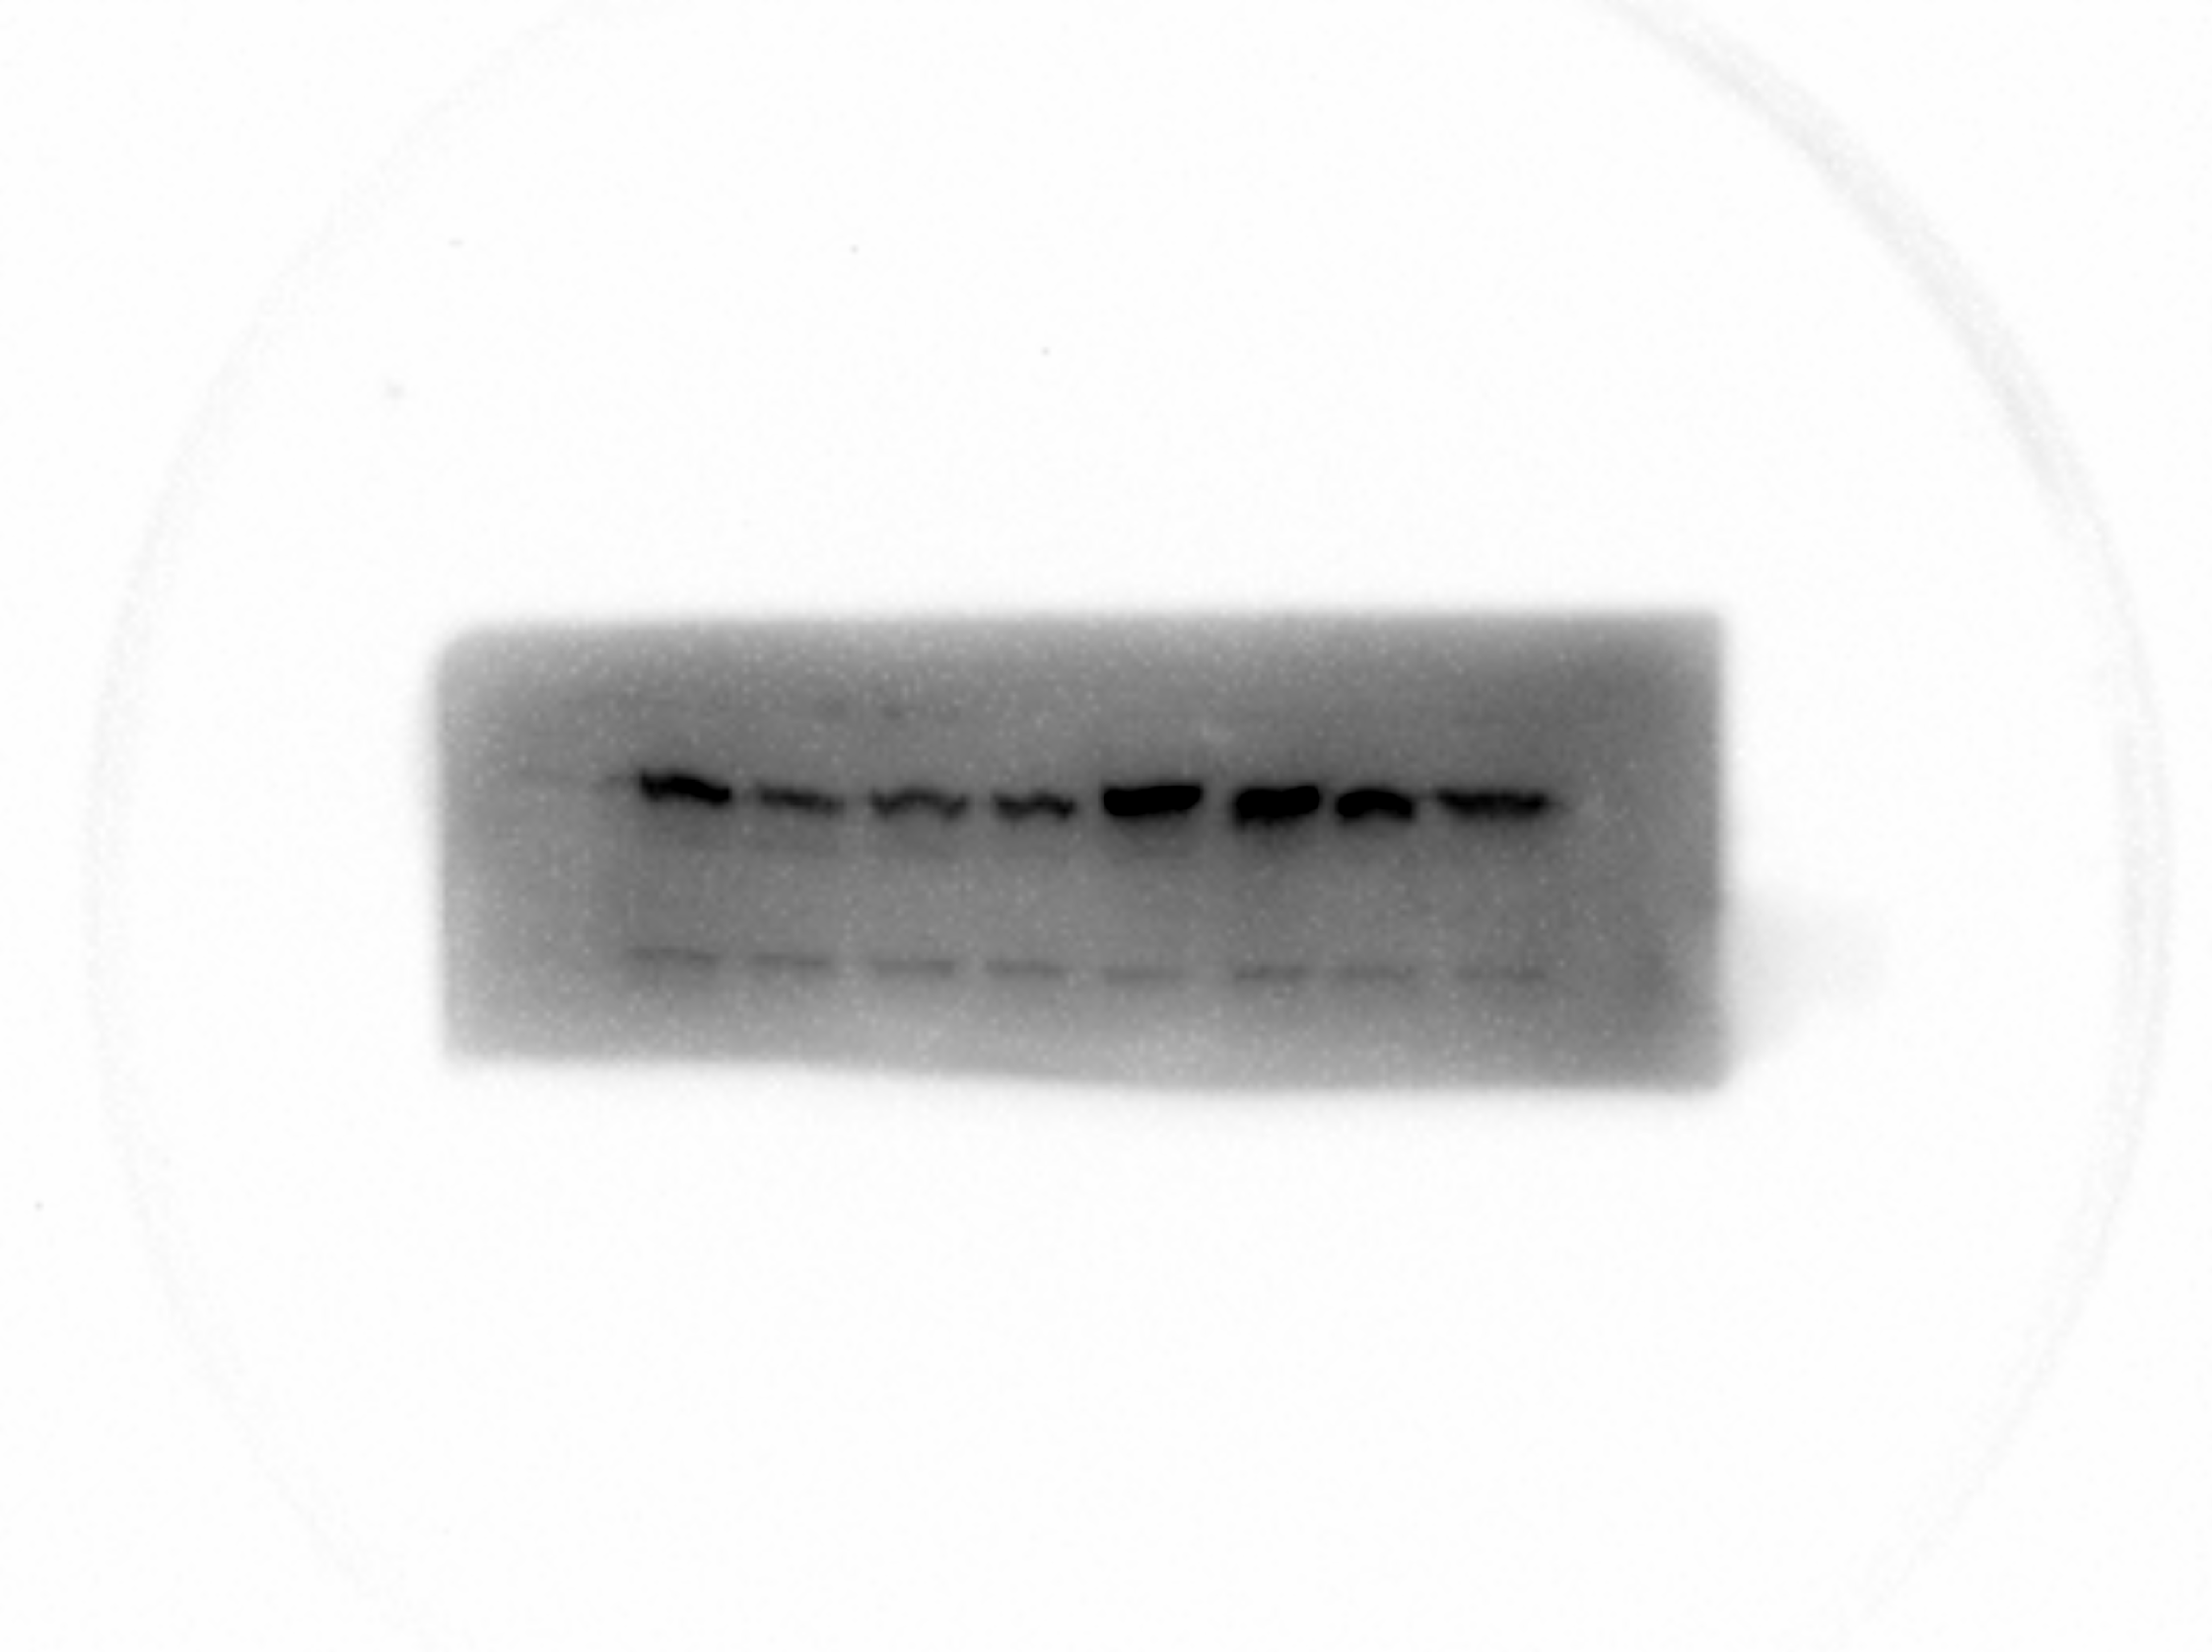


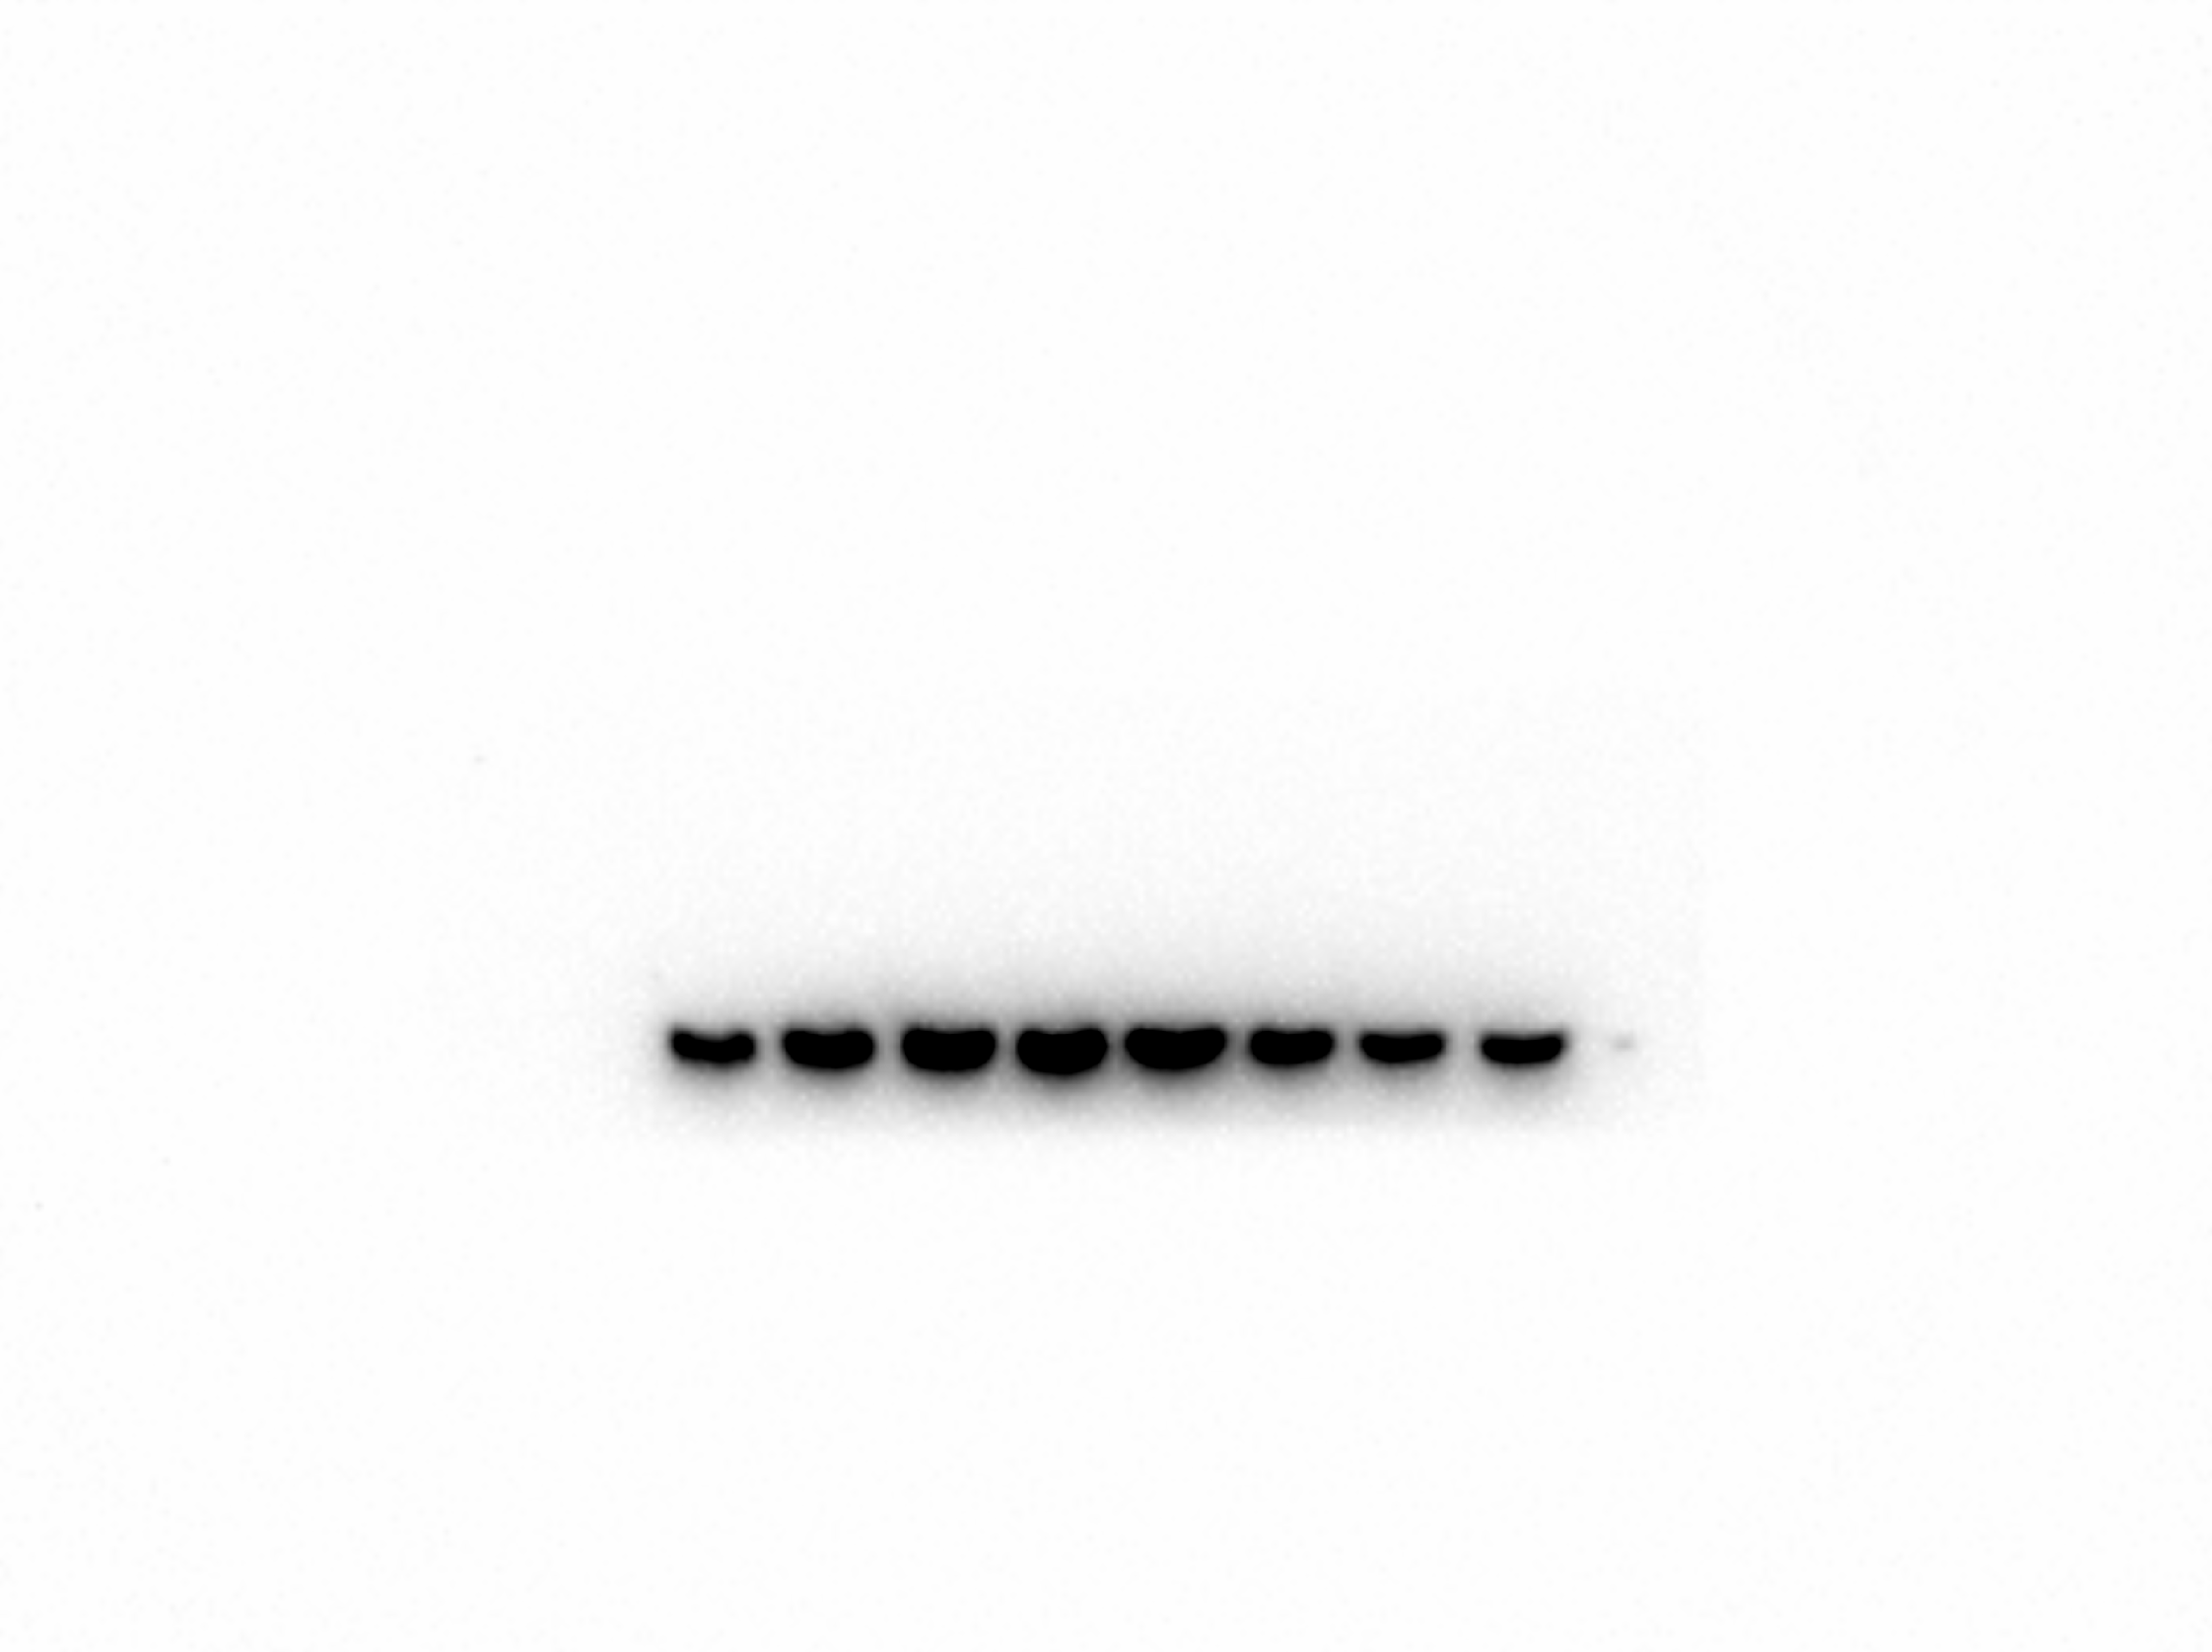

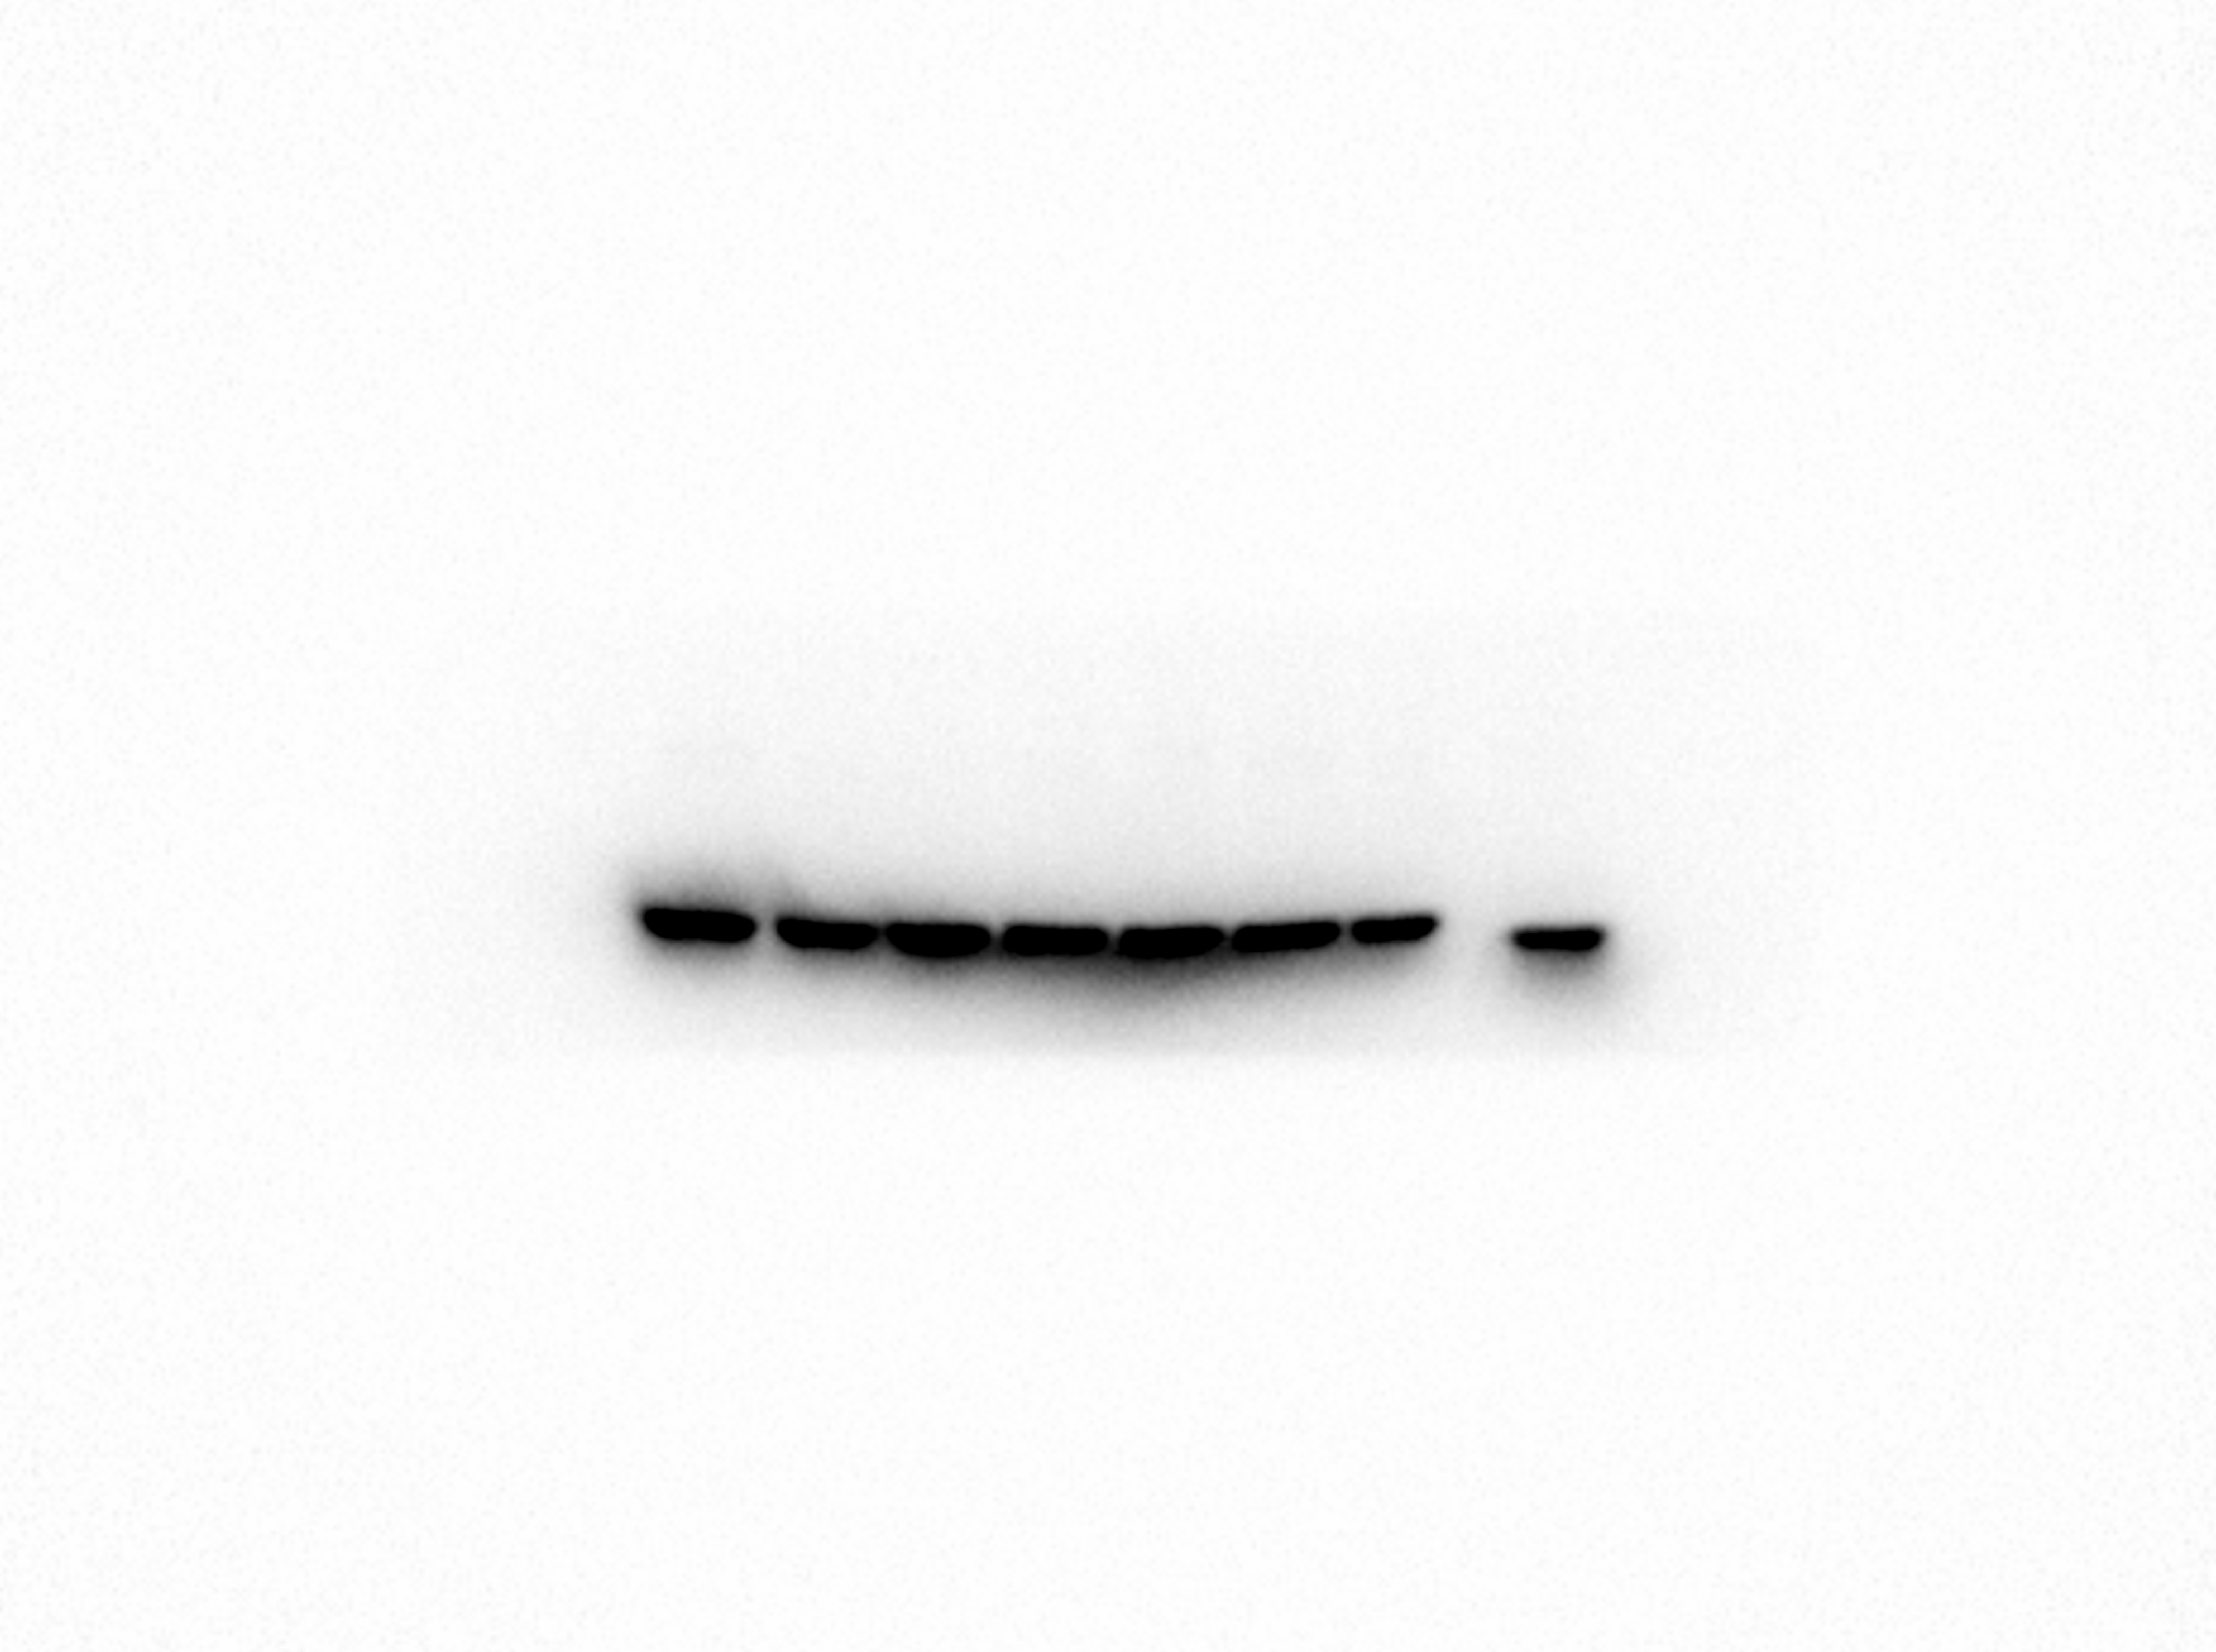

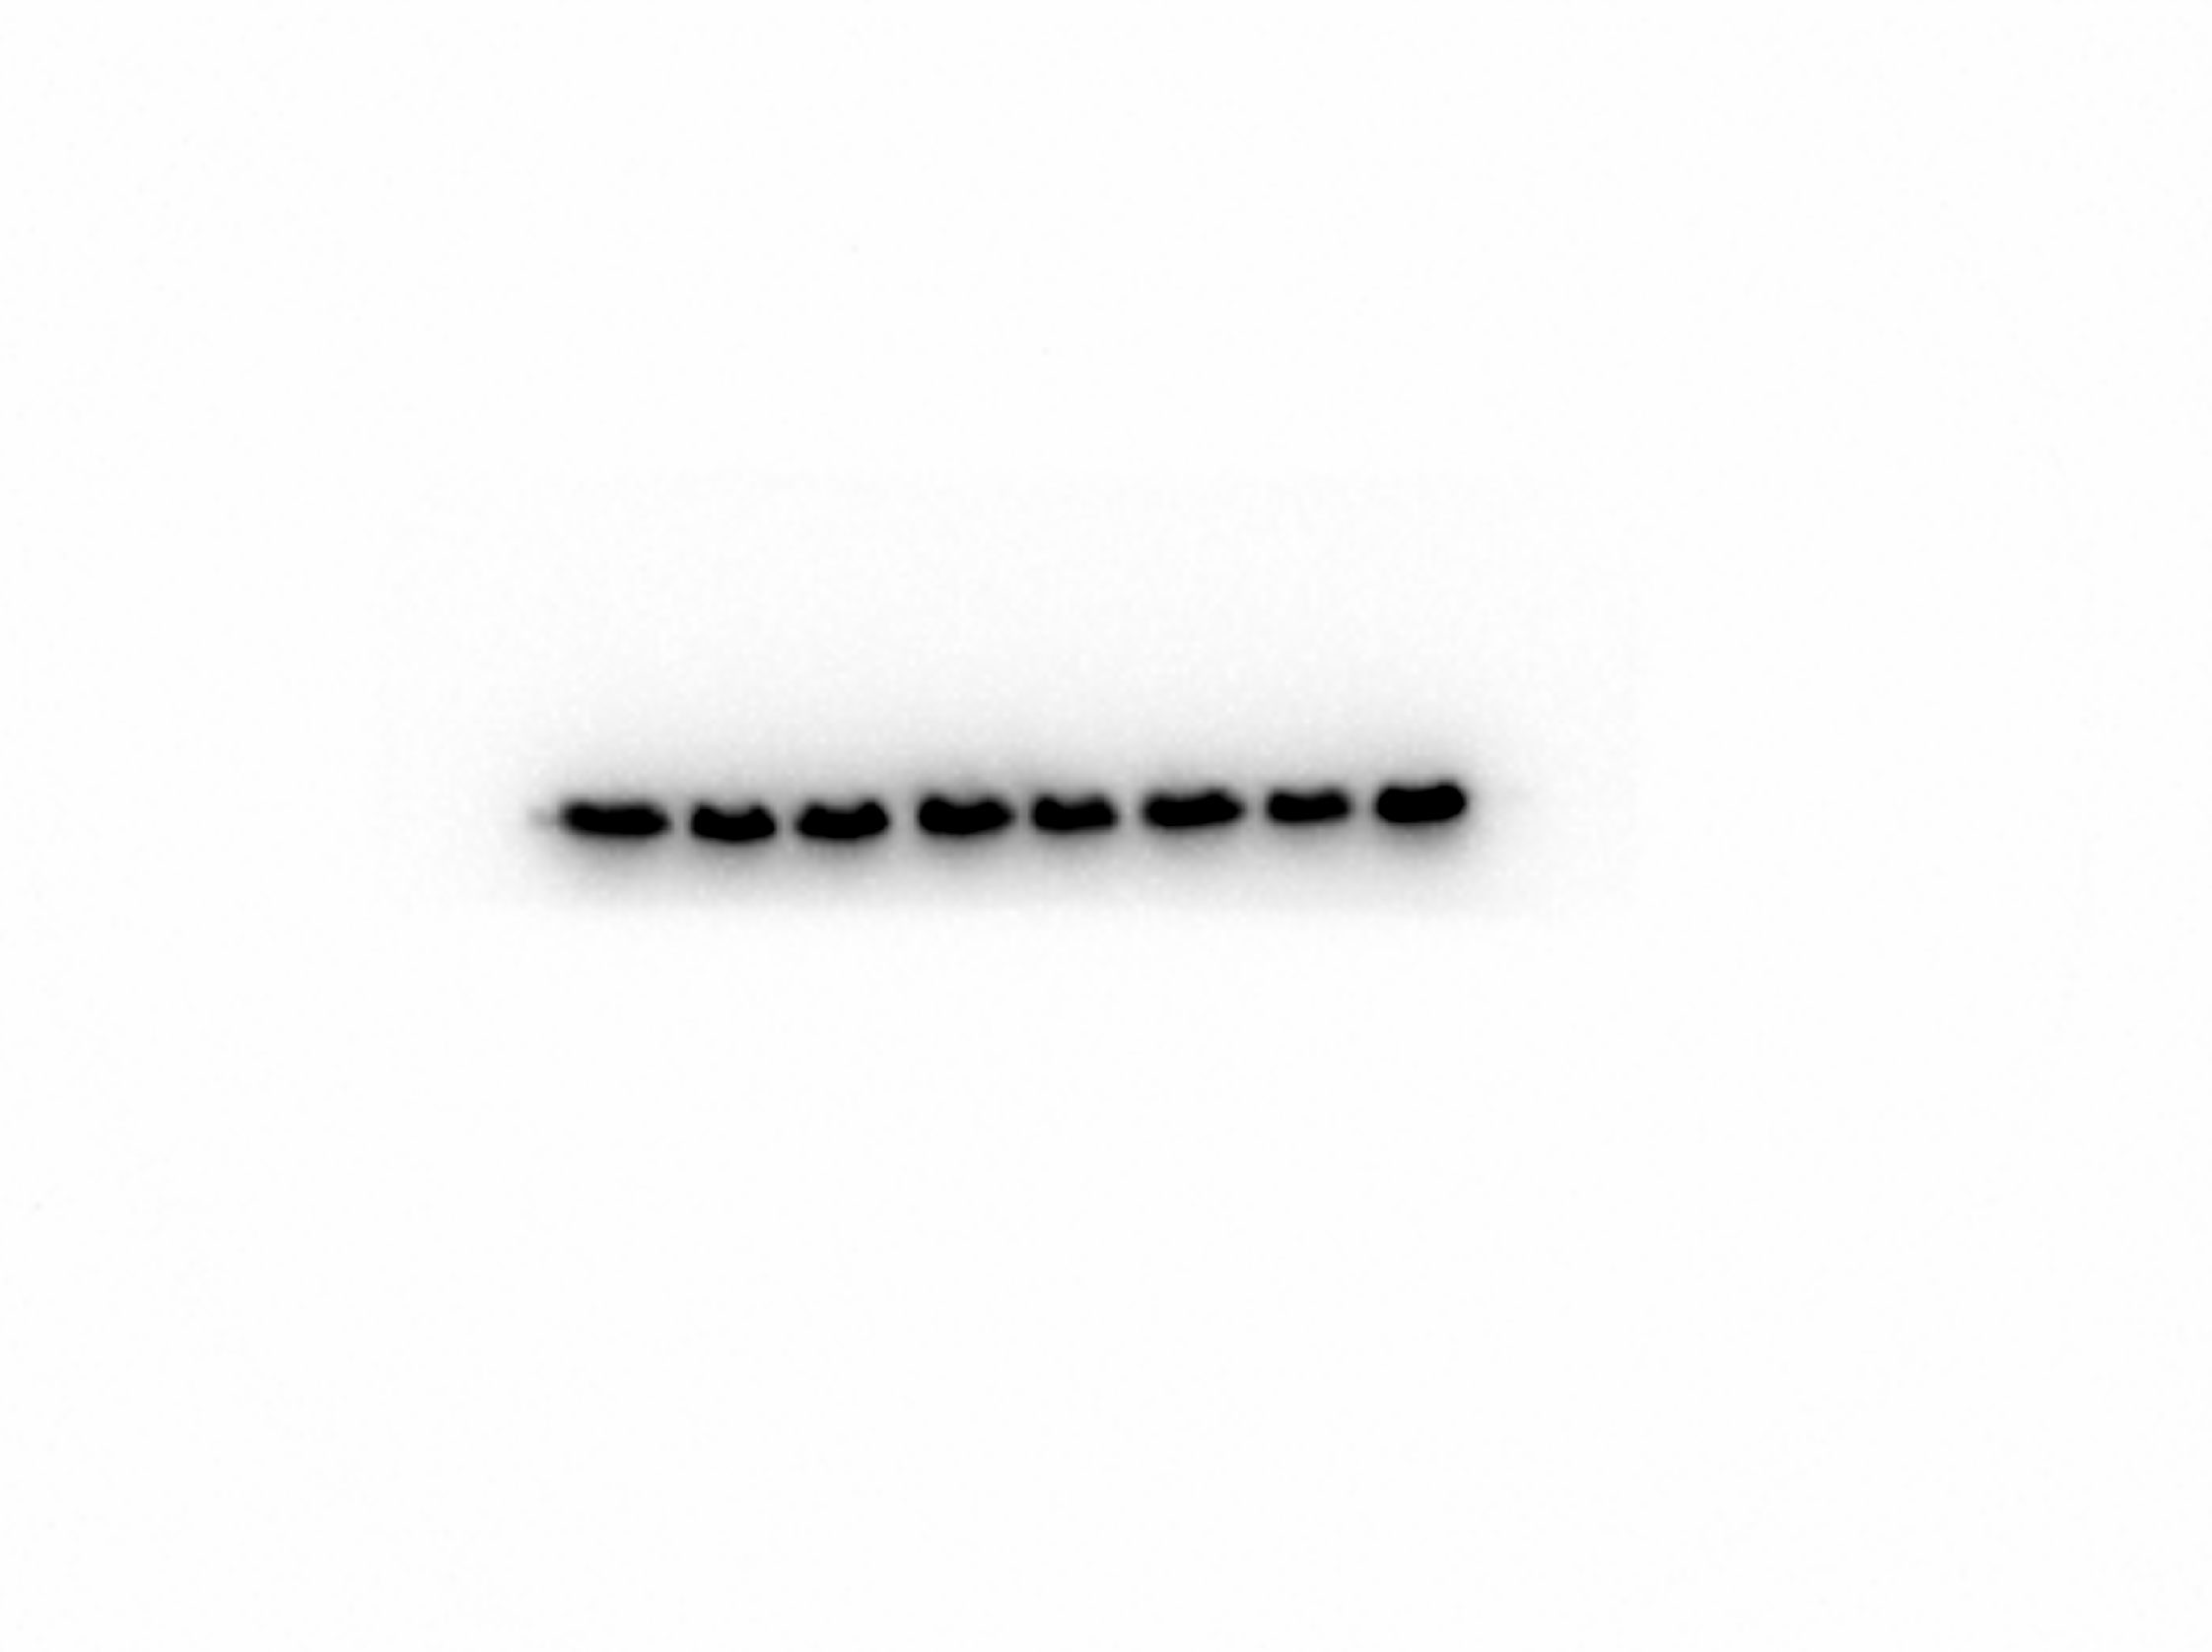


**Fig. 3**

3G GFP-ERLIN2

3G GAPDH


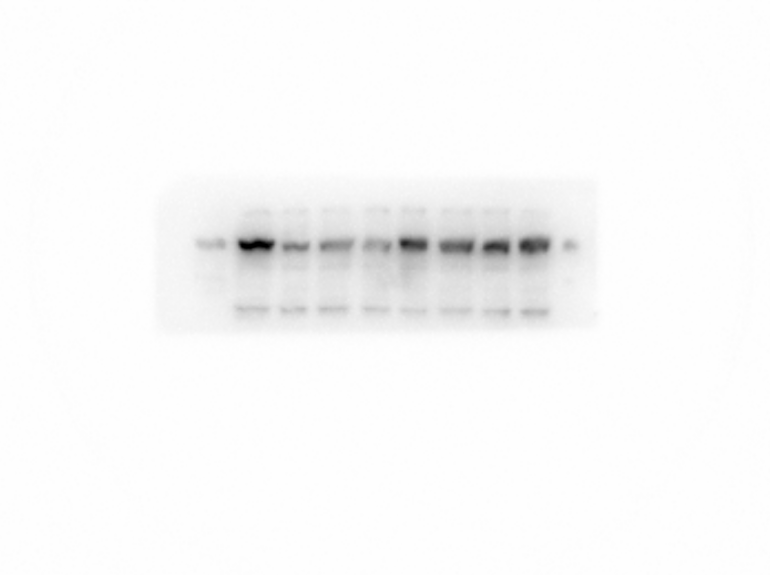

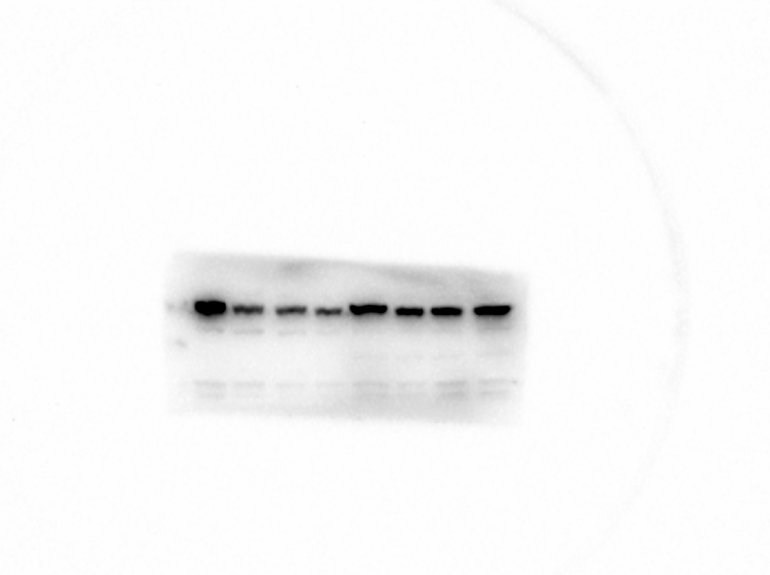

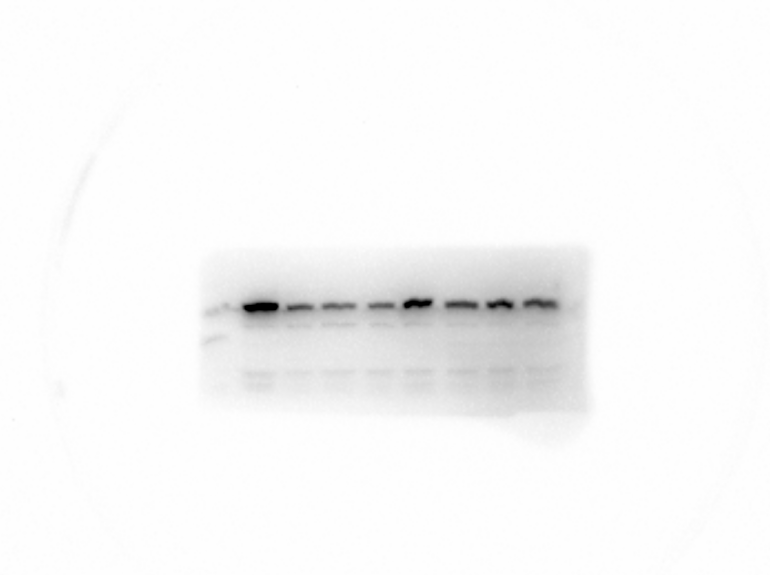


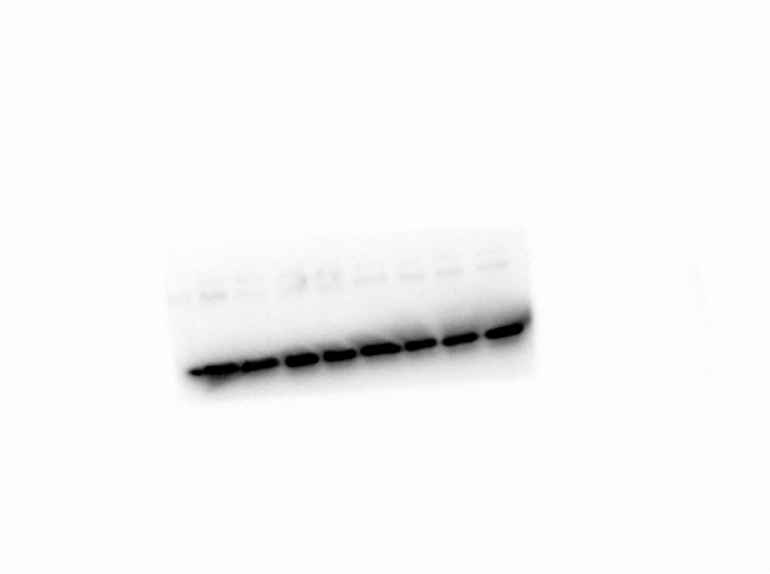

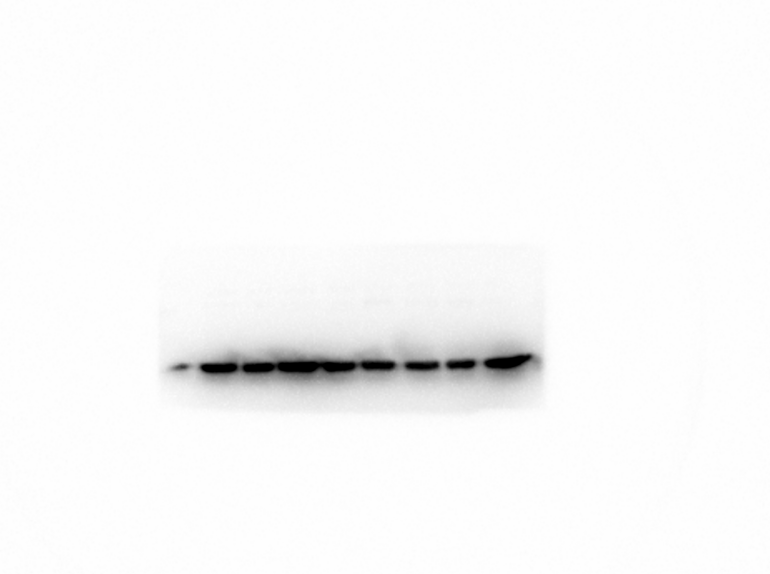

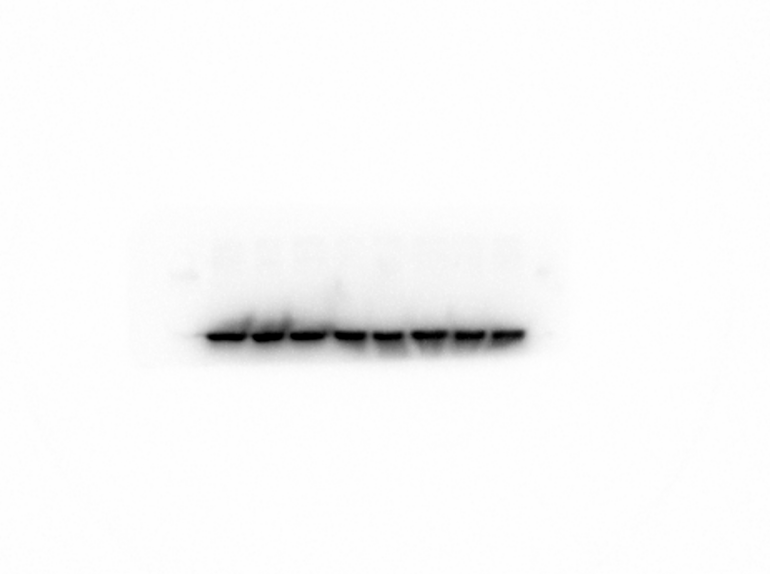


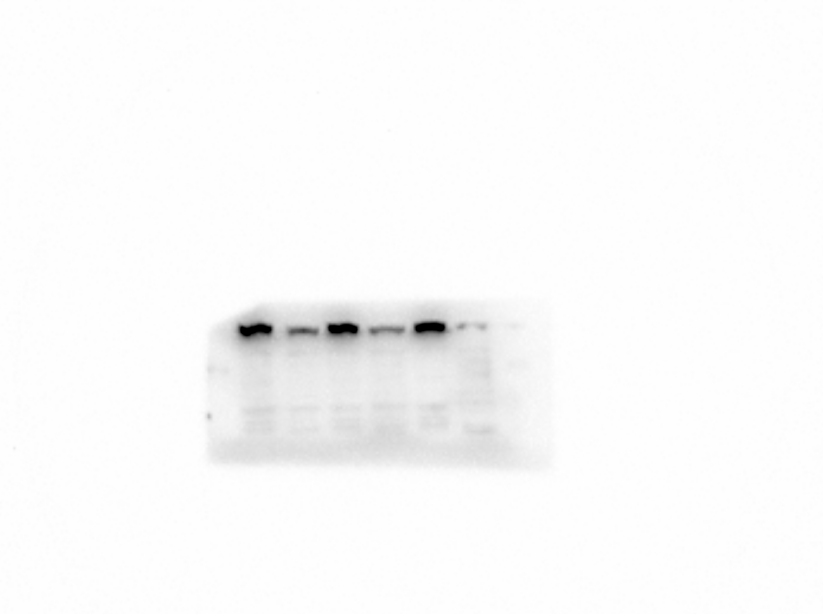

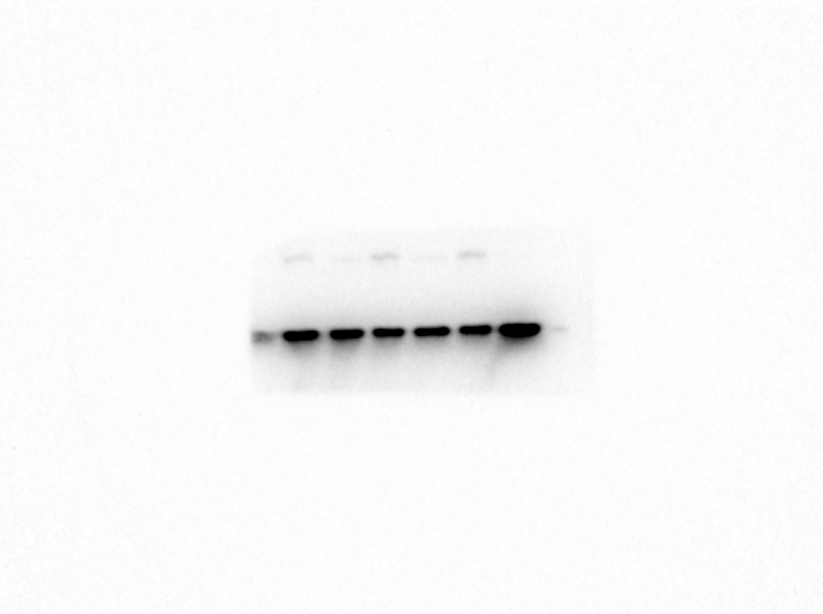


**Fig. 4**

4A GFP-ERLIN2

4A GAPDH


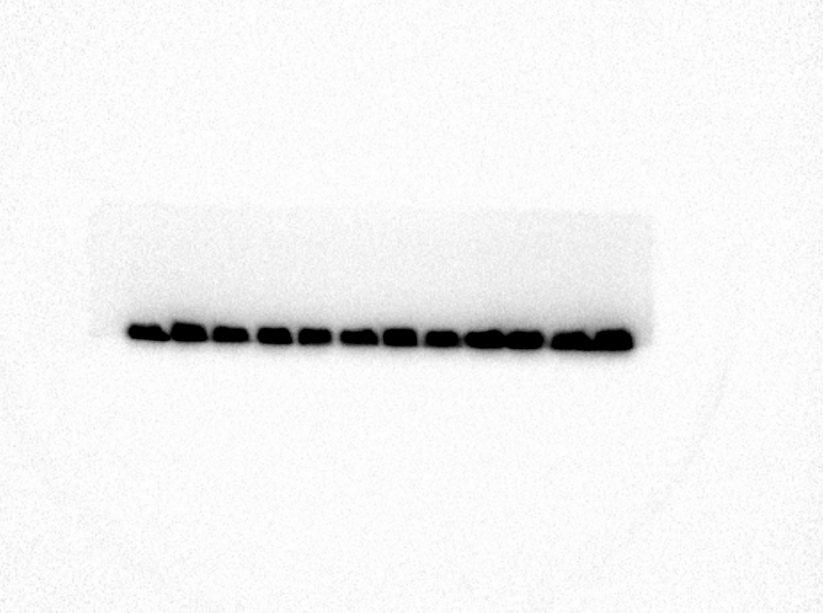

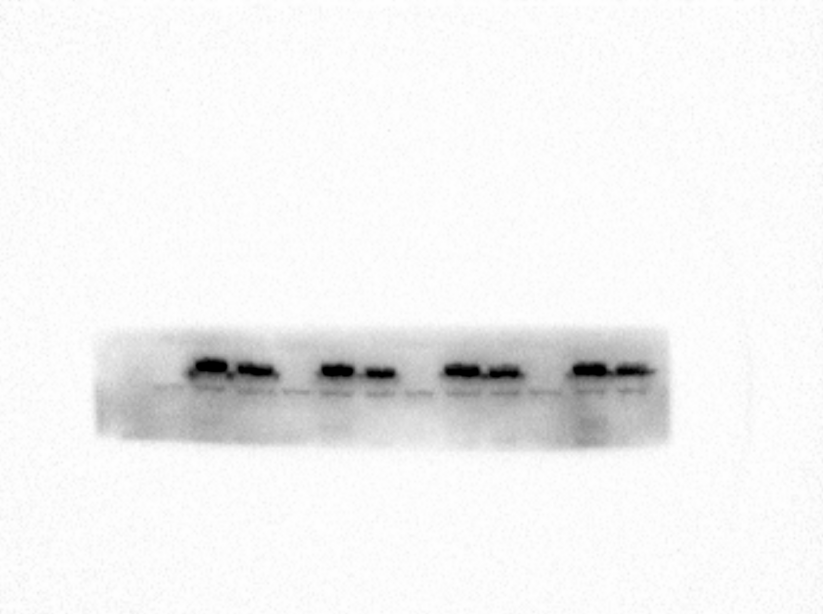


**Fig. 4**

4B GFP-ERLIN2

4B GAPDH

**Fig. 4**

4C GFP-ERLIN2

4C GAPDH


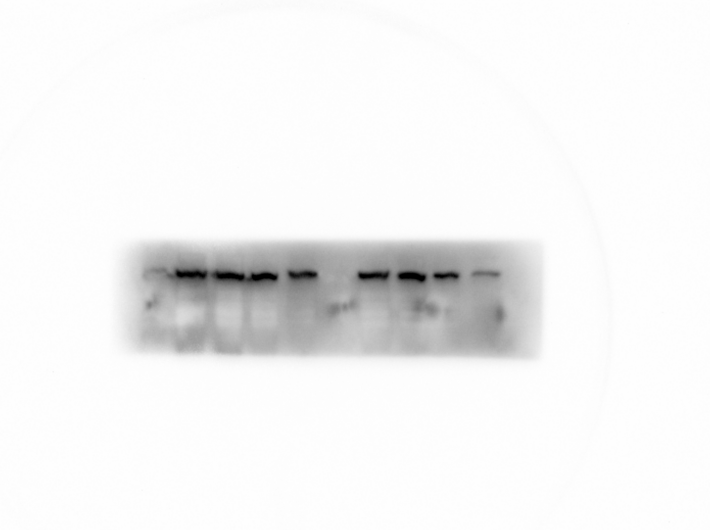

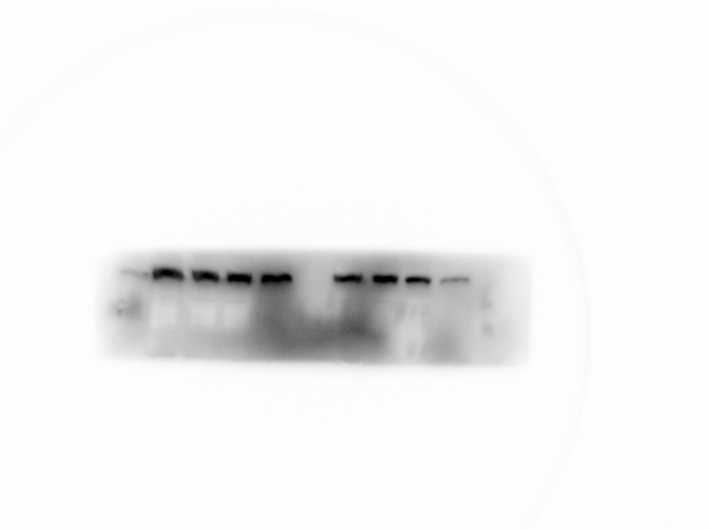

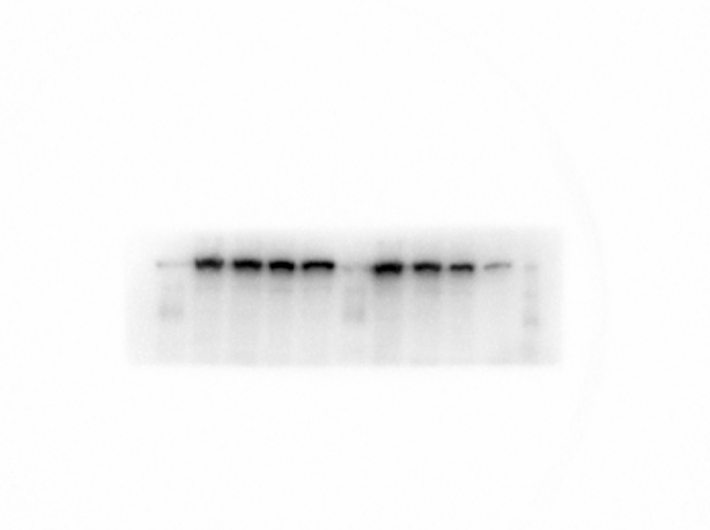


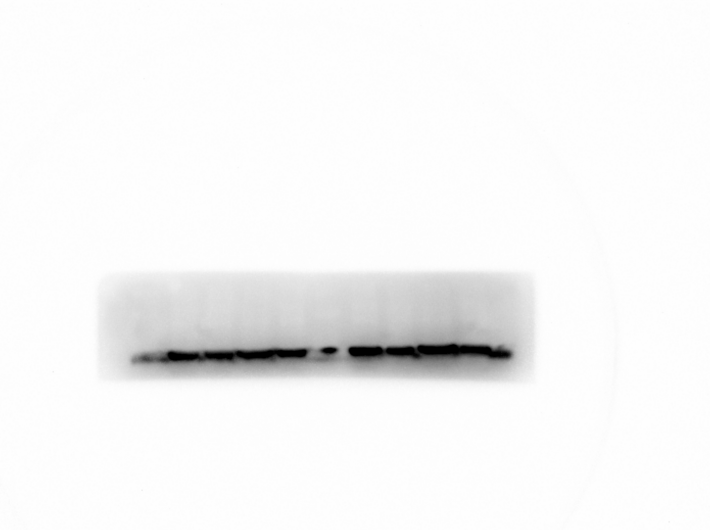

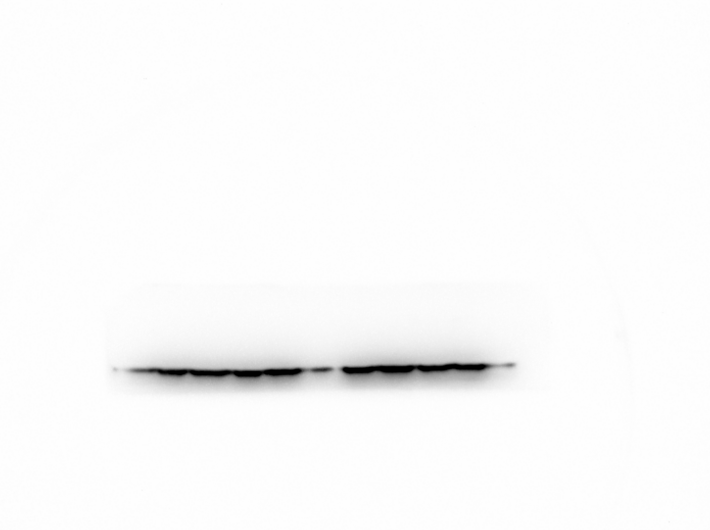

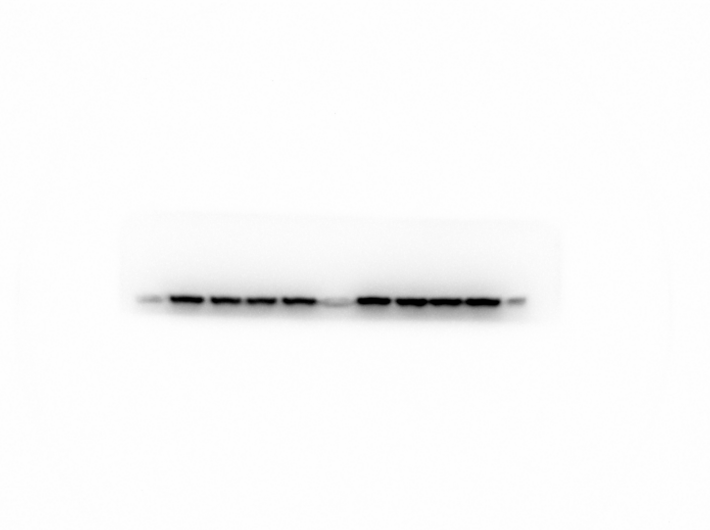


**Fig. 4**

4D GFP-ERLIN2

4D GAPDH


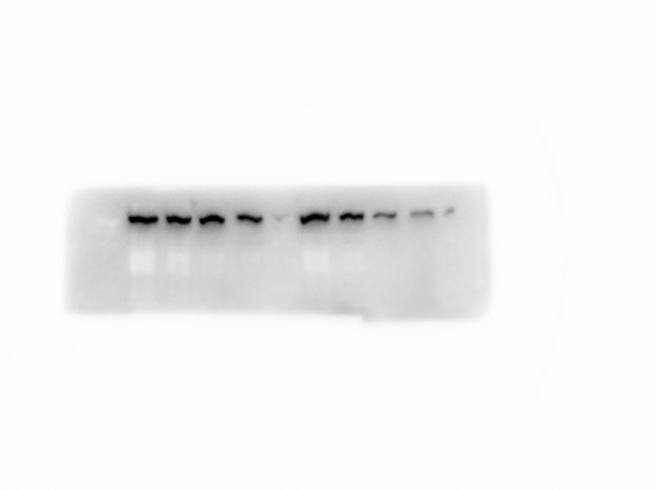

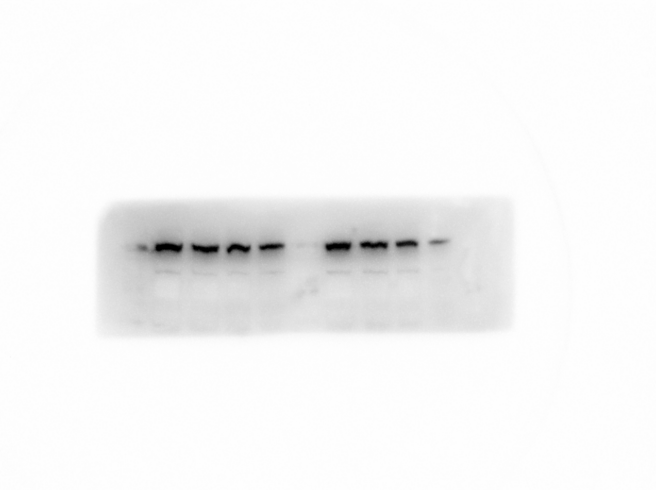

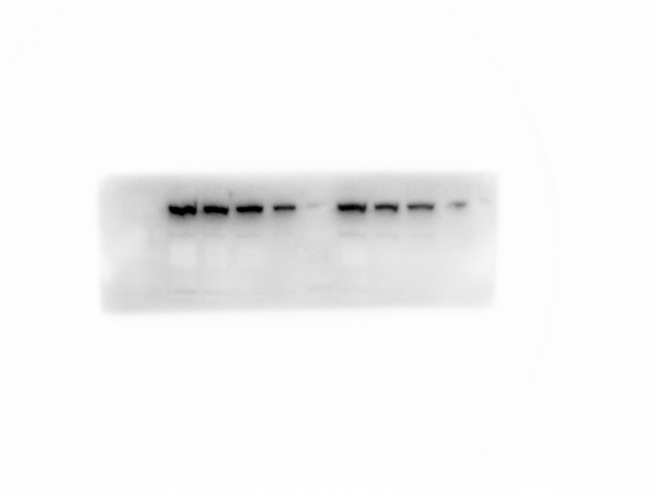


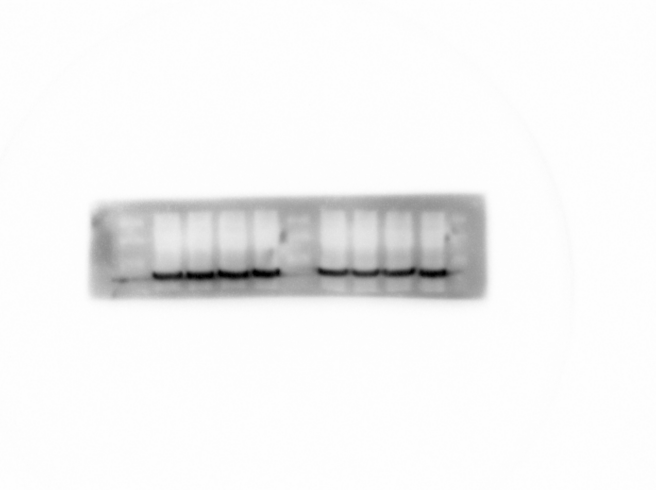

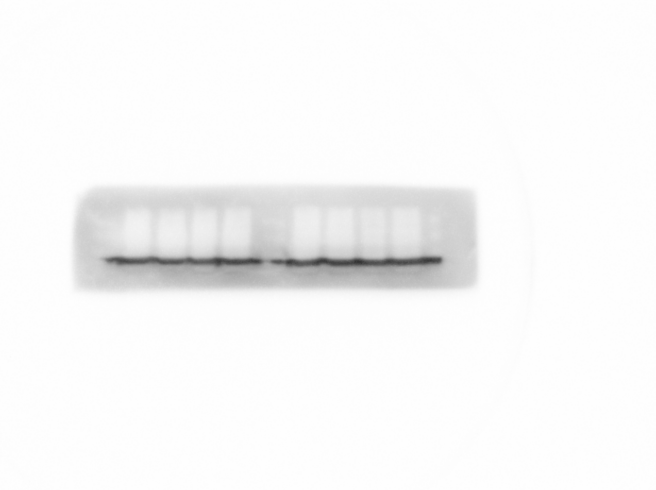

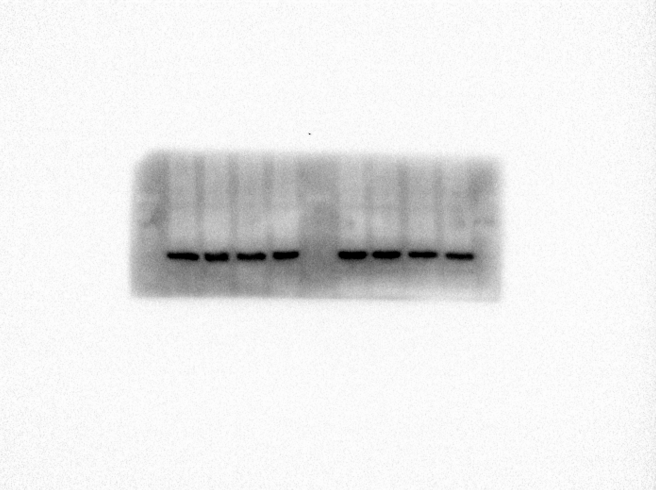


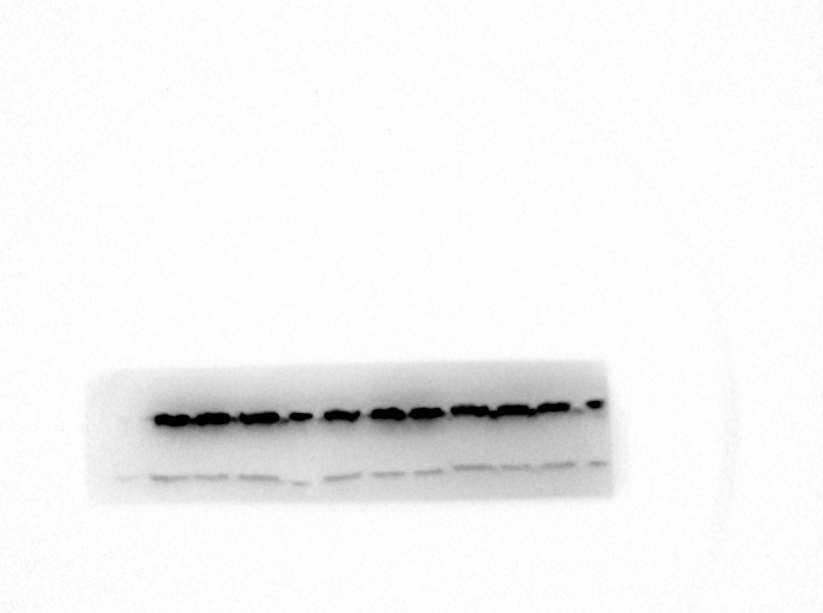

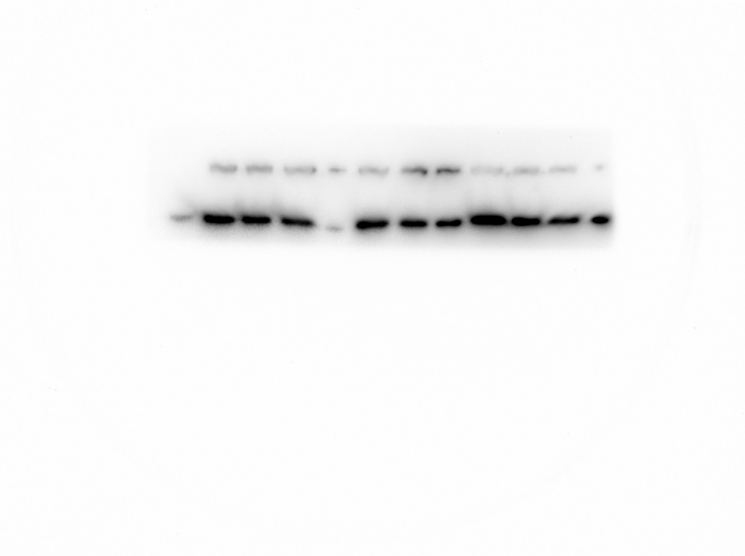


**Fig. 4**

4E GFP-ERLIN2

4E GAPDH


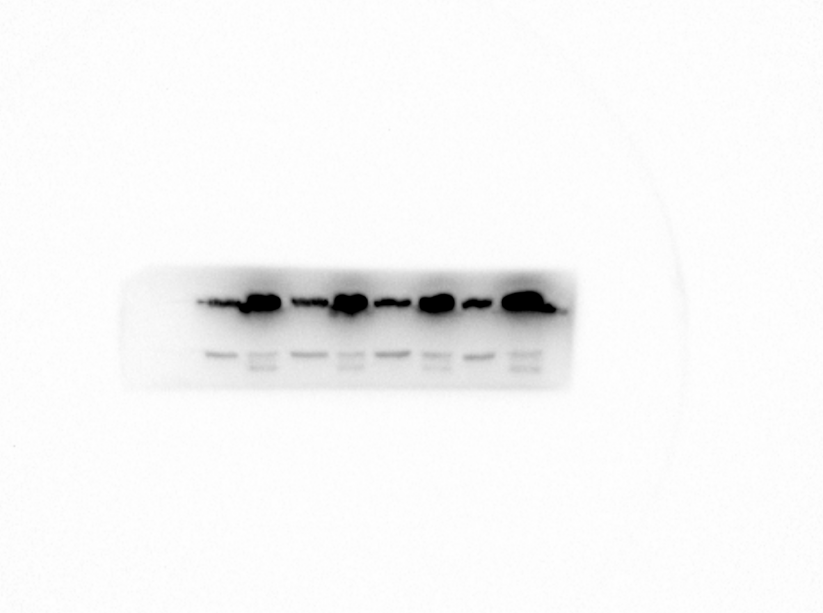


**Fig. 4**

4F GFP-ERLIN2

4F GAPDH


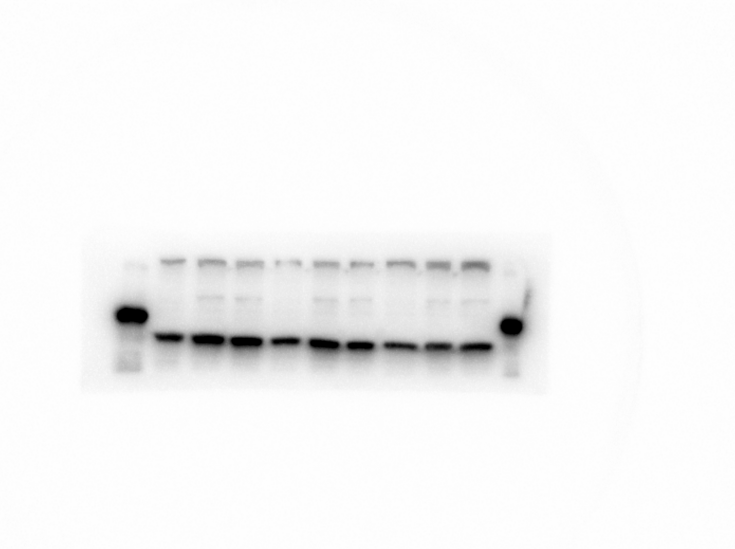


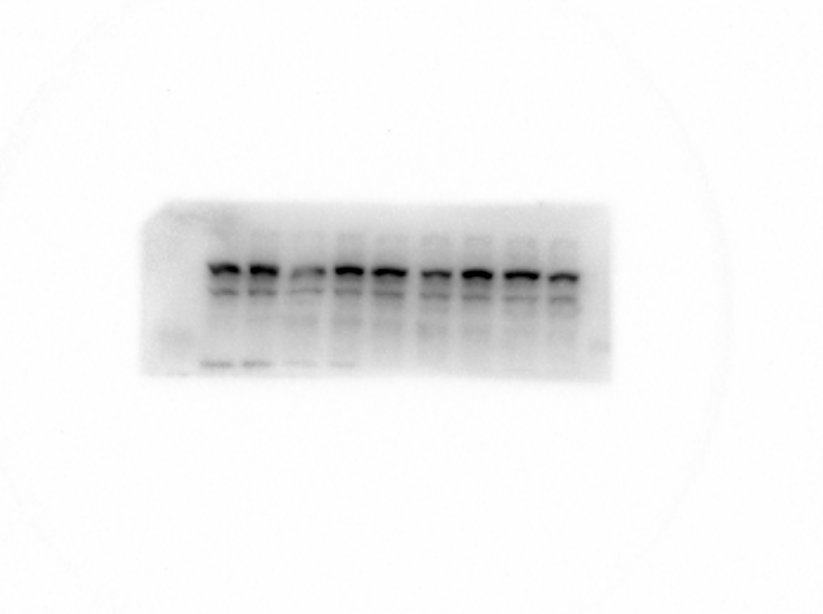

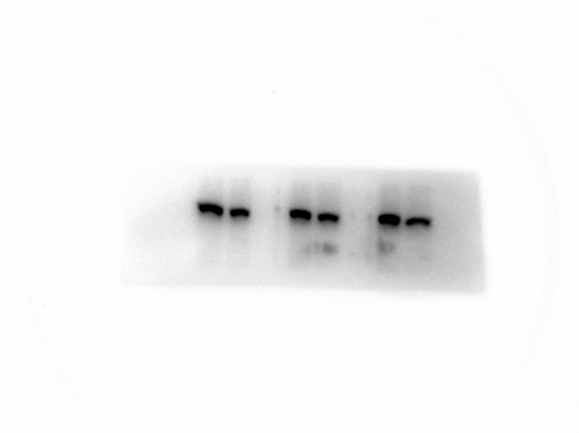


**Fig. 4**

4G IB: GFP

4G Input GFP

4G IB: Ub


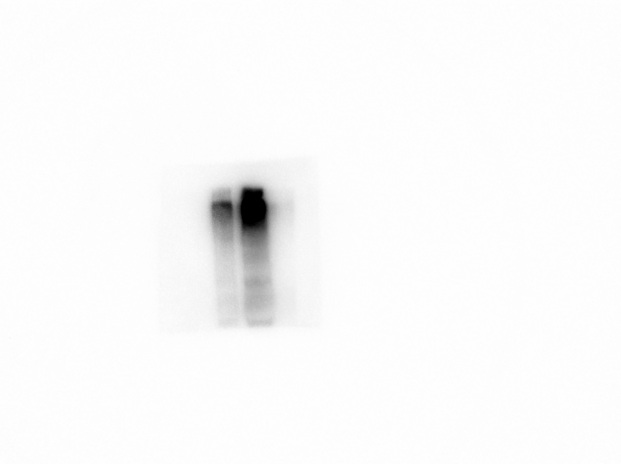

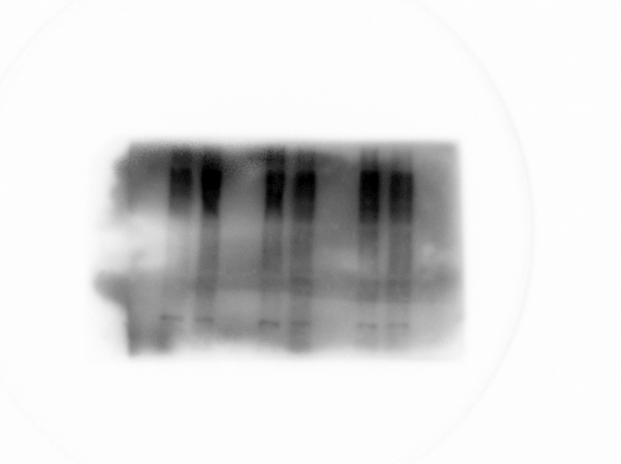

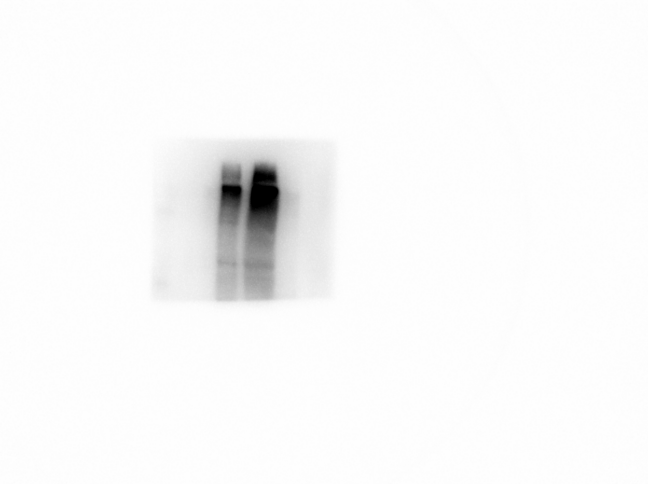


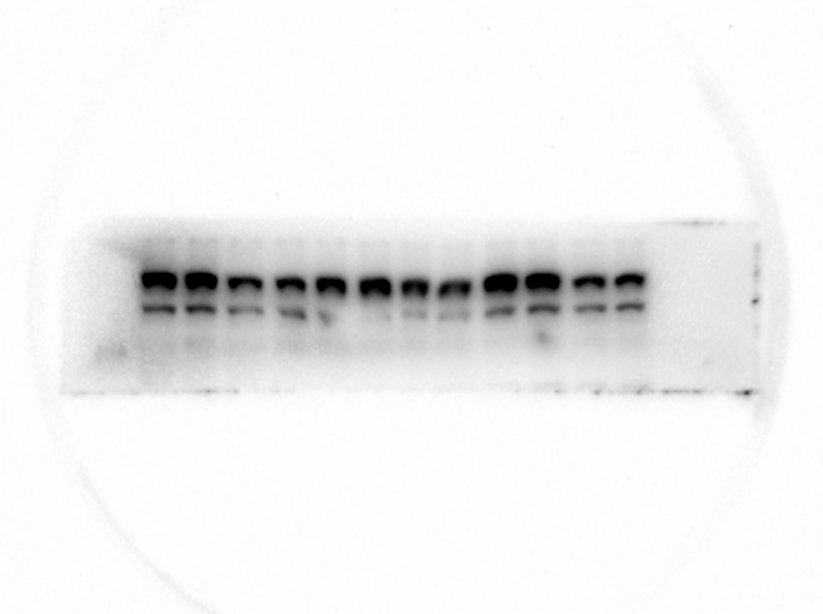

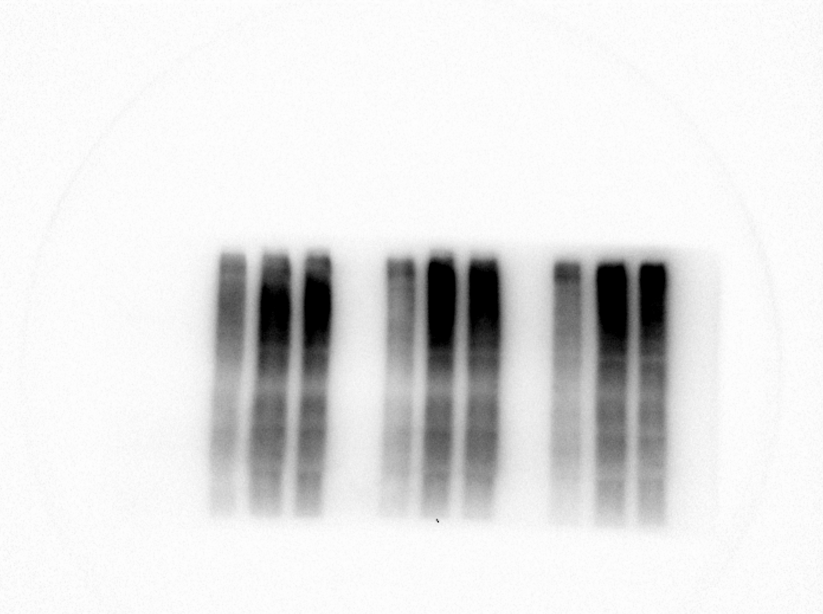

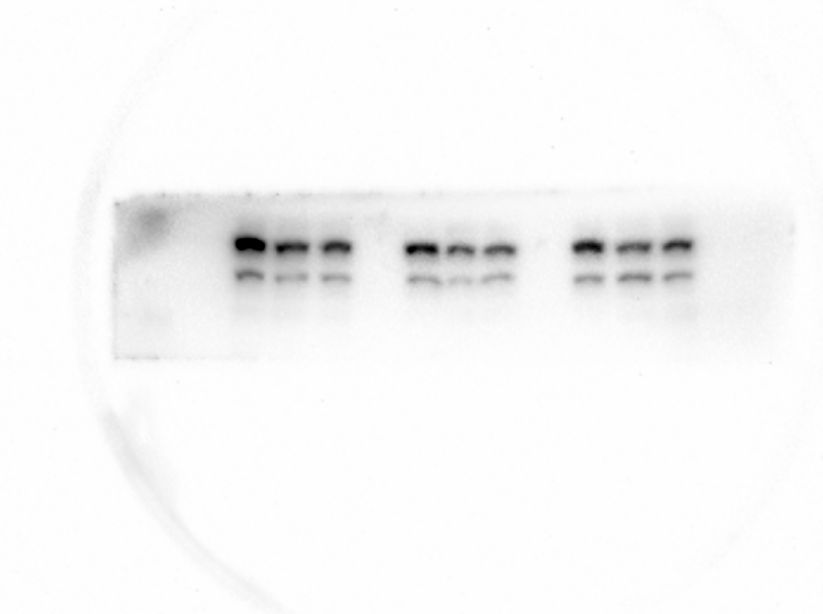


**Fig. 4**

4H IB: GFP

4H Input GFP

4H IB: Ub


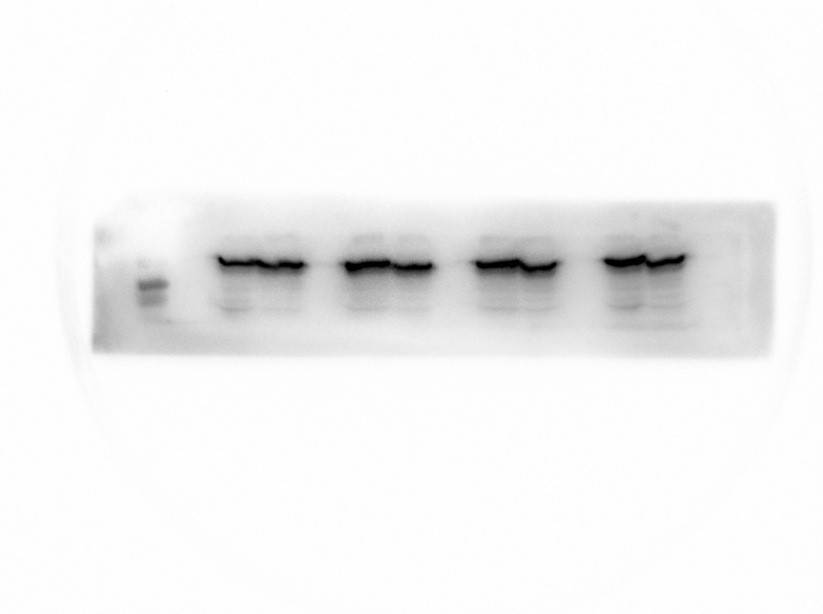

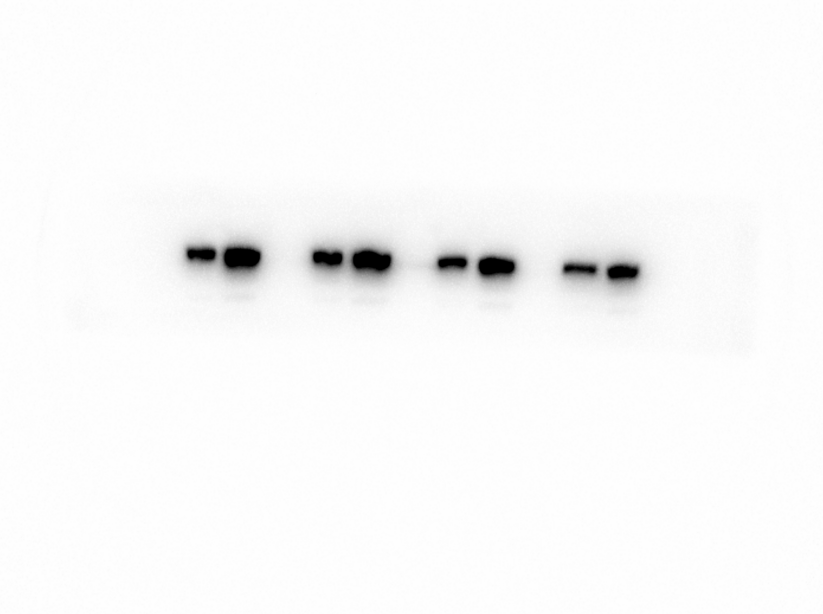


**Fig. 4**

4I IB: GFP

4I Input GFP

4I IB: MARCHF6

4I Input GFP


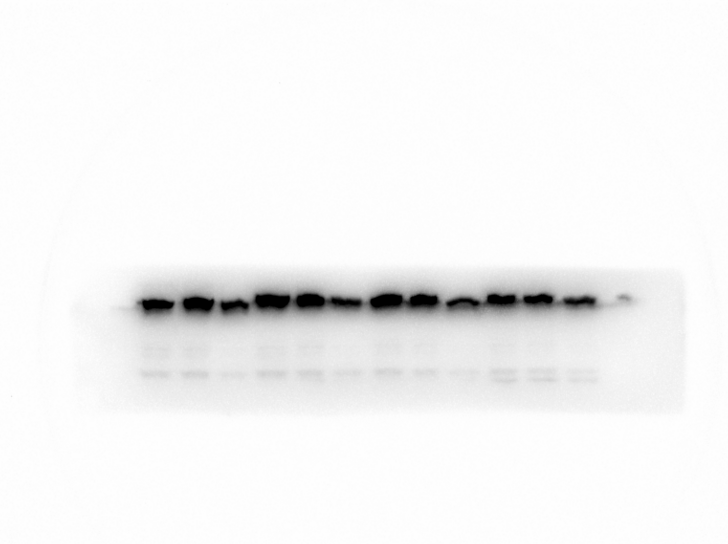

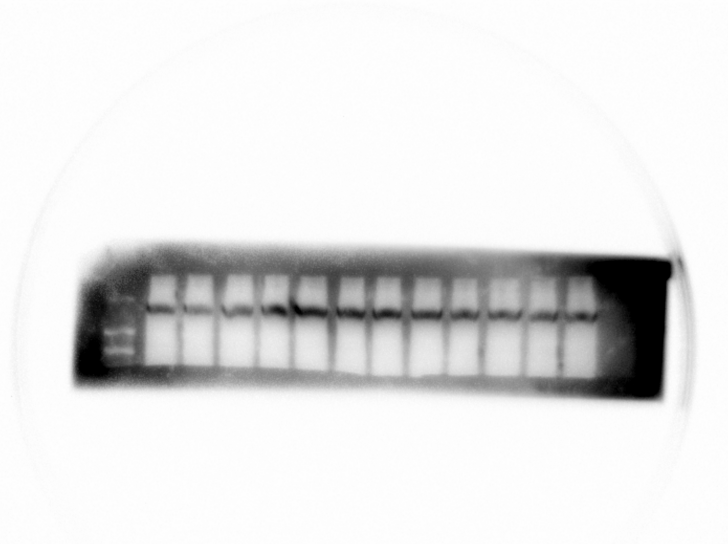


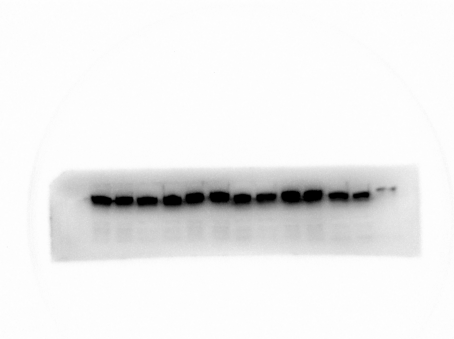

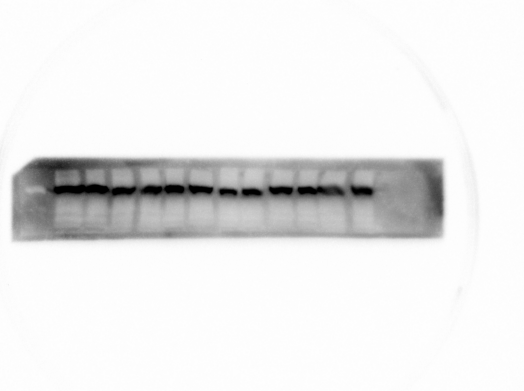

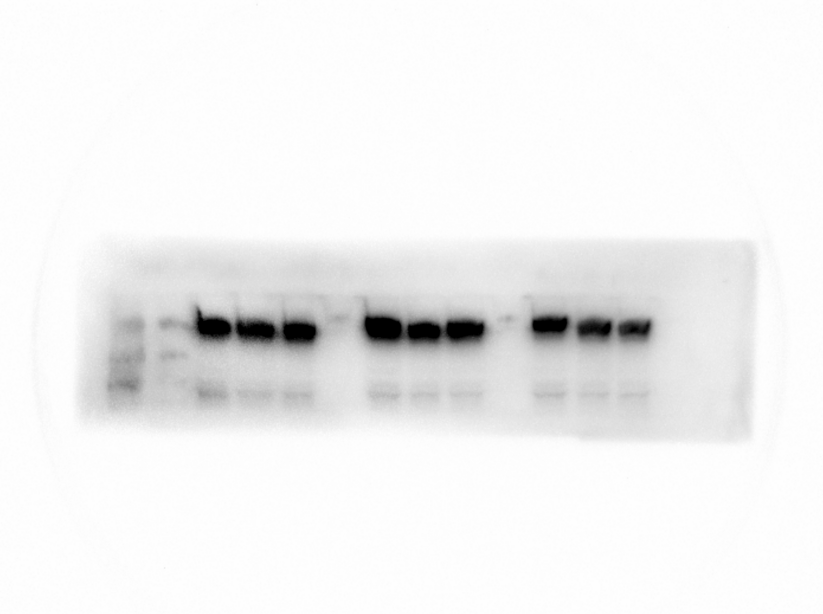


**Fig. 4**

4J IB: GFP

4J Input GFP

4J IB: MARCHF6


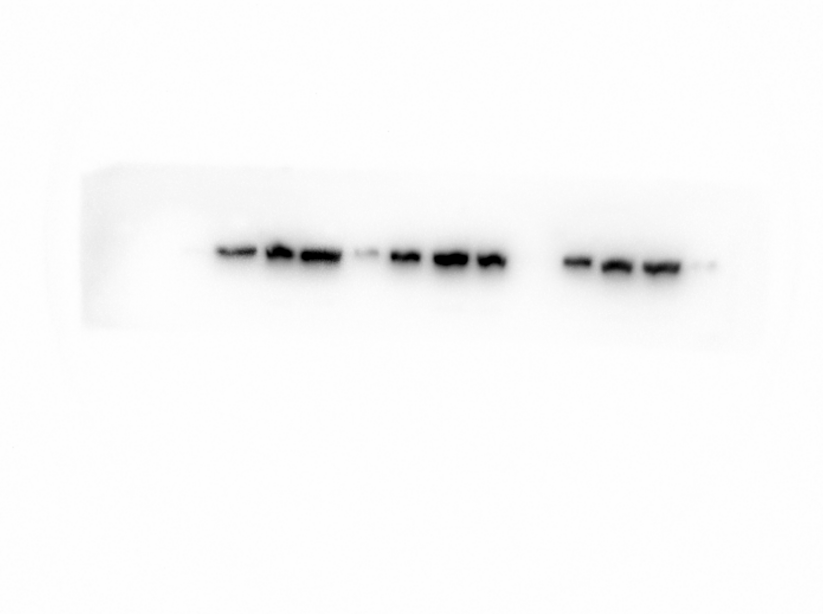


4J Input GFP


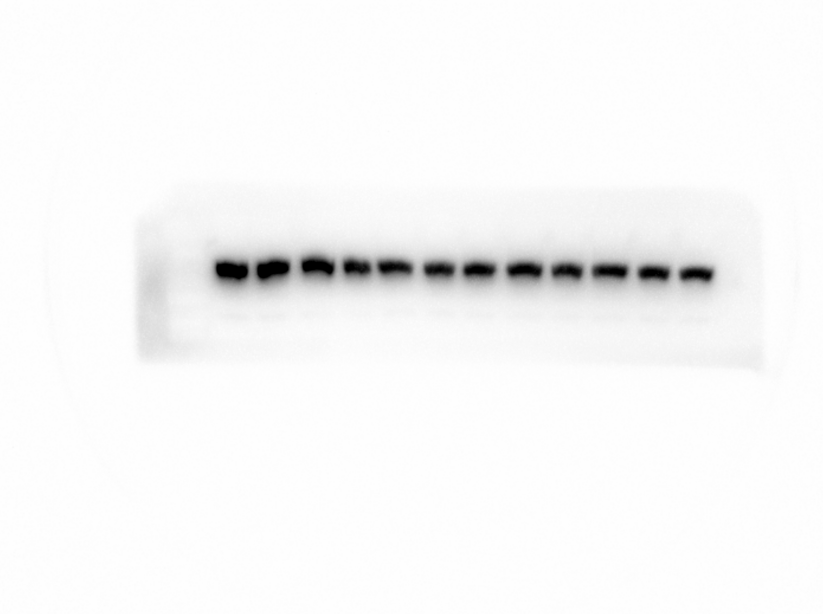


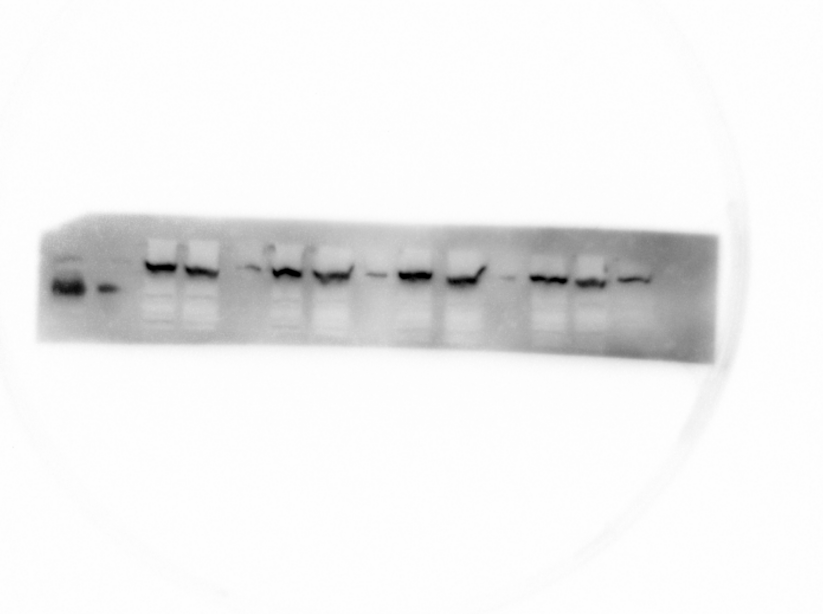

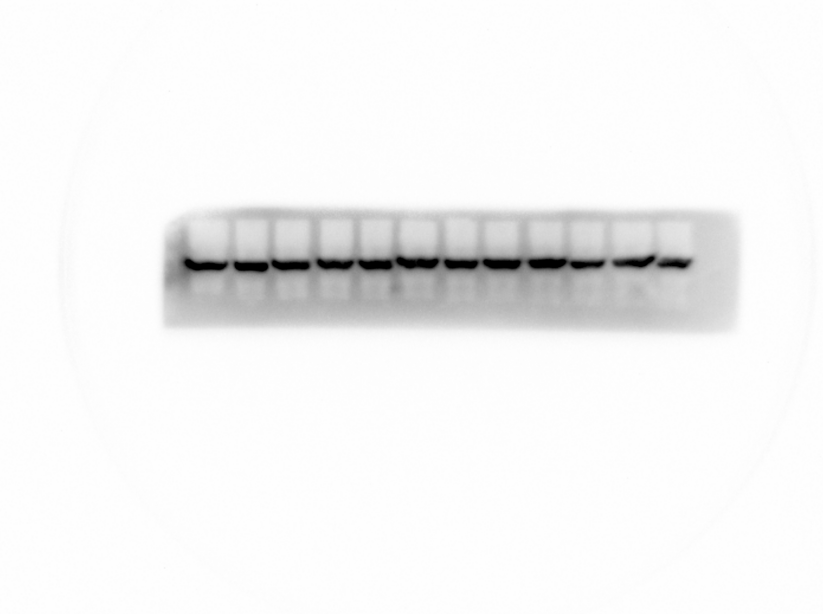


**Fig. 6**

6F GFP

6F GAPDH

6F CCNB1


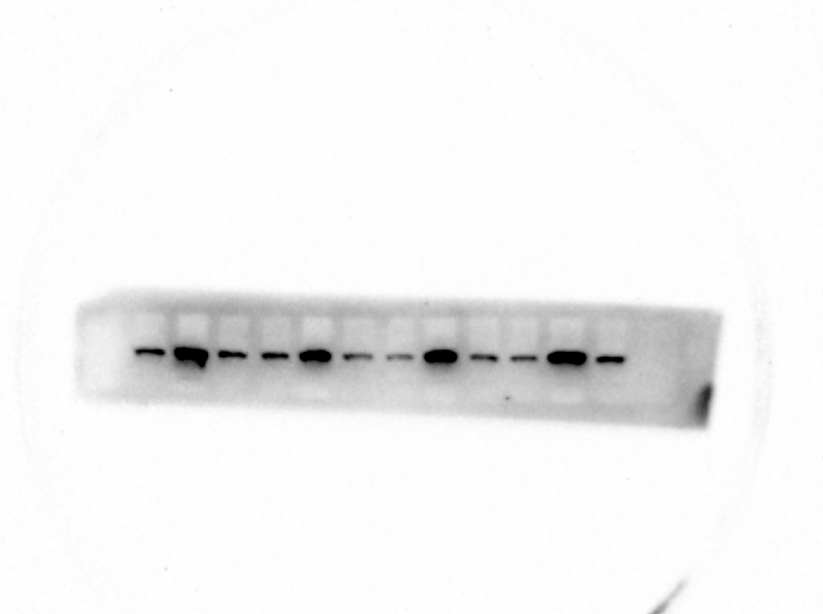


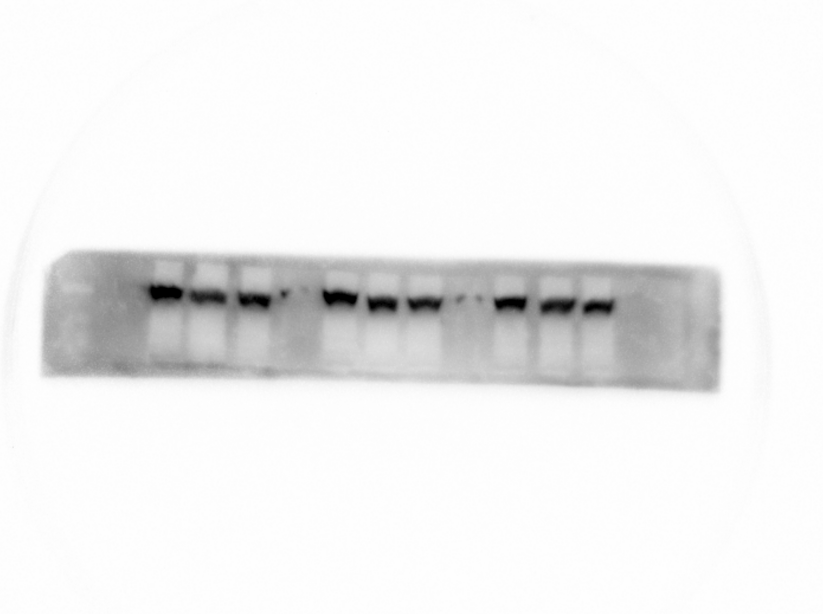


**Fig. 6**

6G GFP

6G GAPDH

6G CCNB1


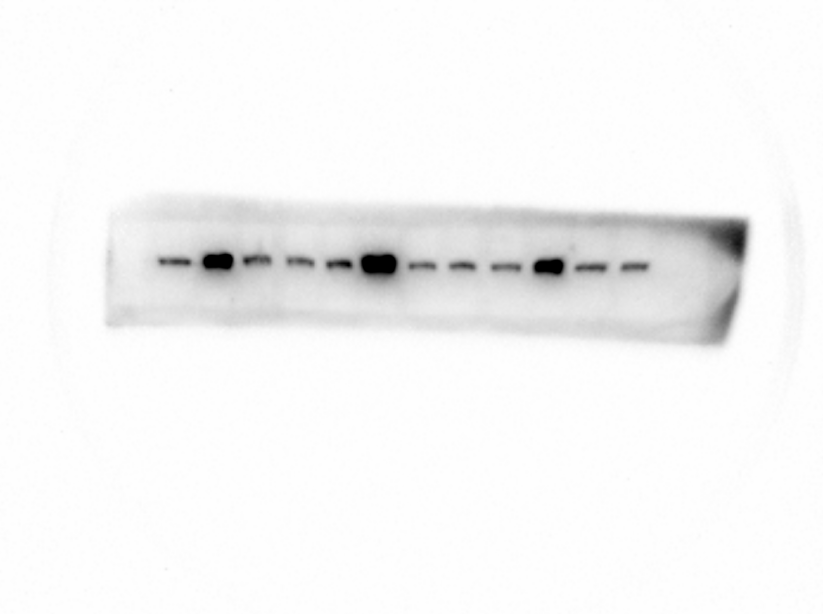


**Fig. 6**

6H CCNB1

6H GAPDH


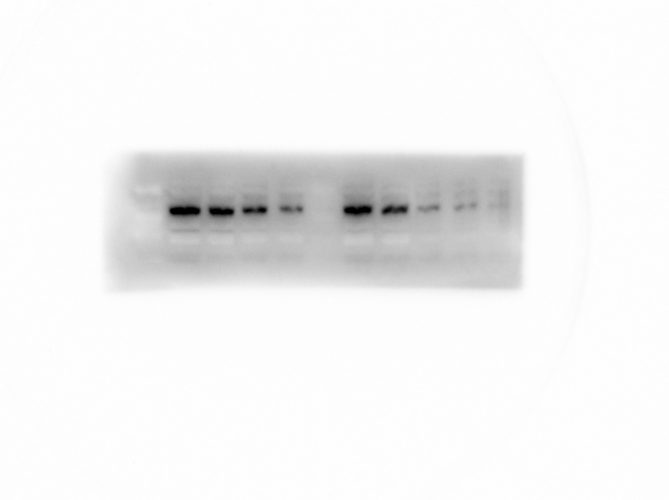

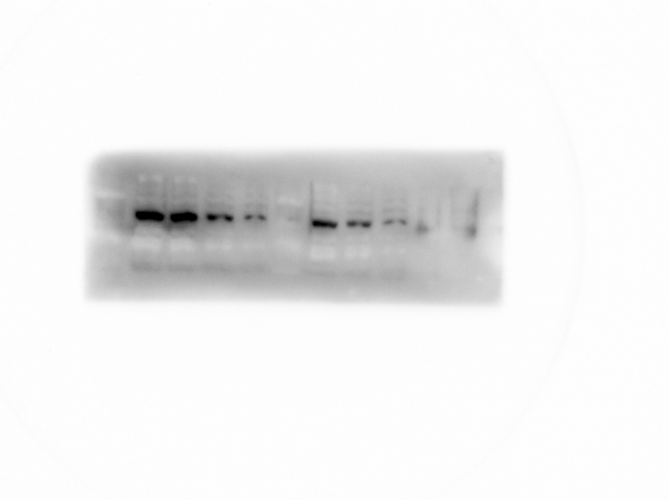

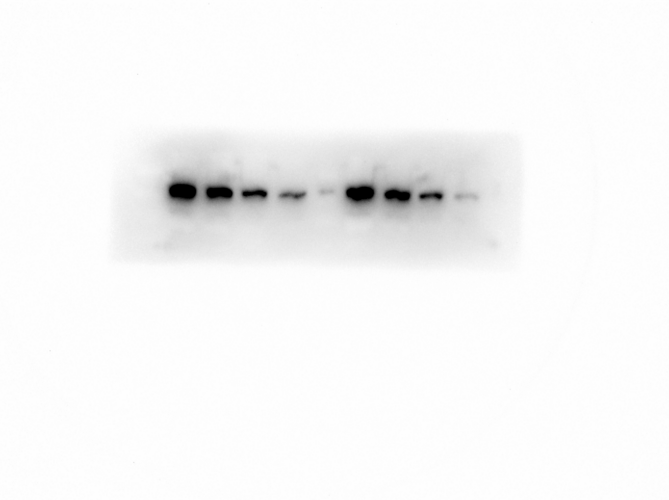


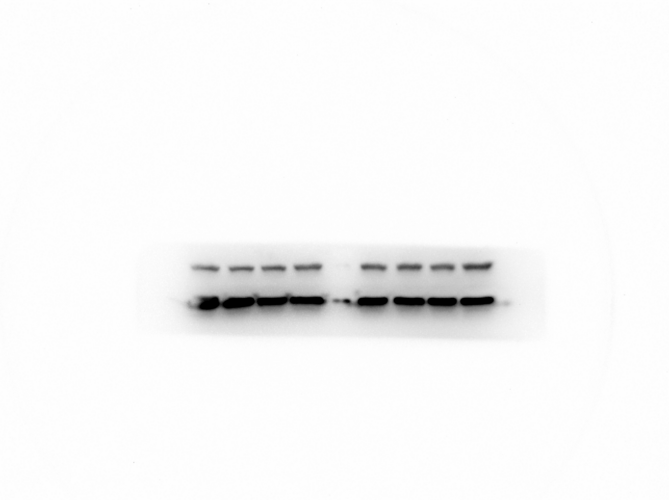

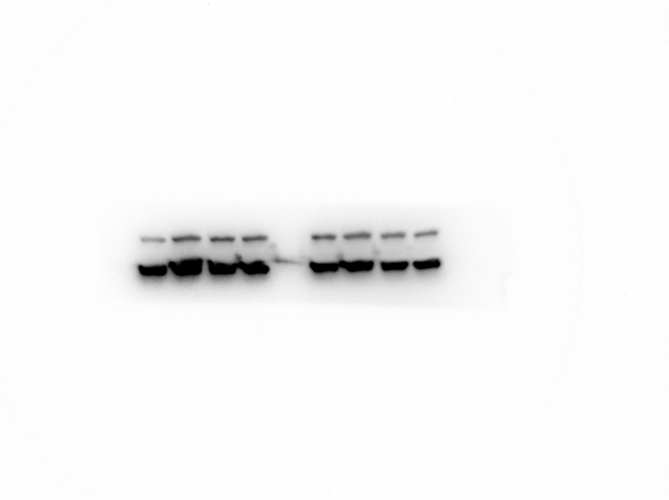

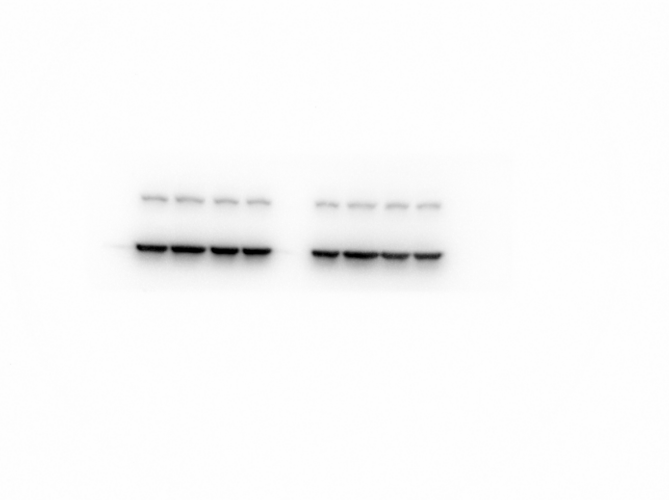


**Fig. 6**

6I CCNB1

6I GAPDH


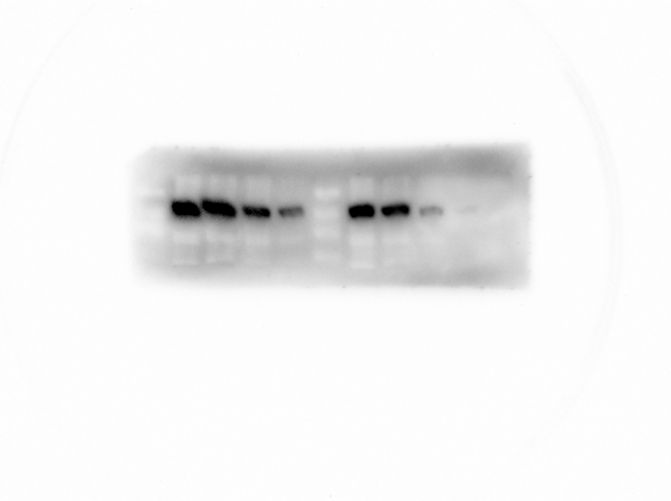

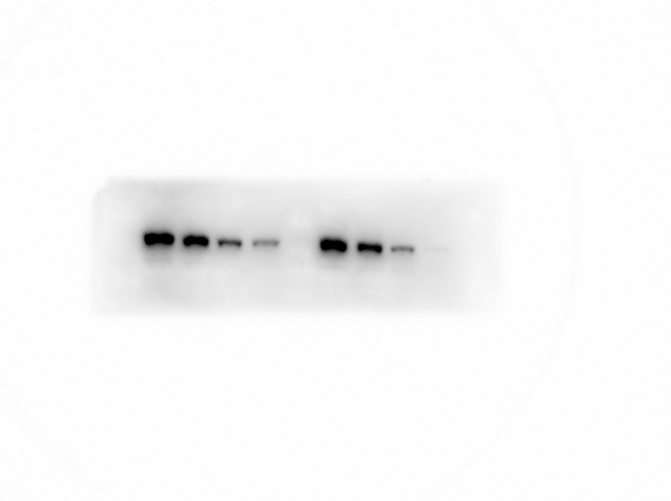

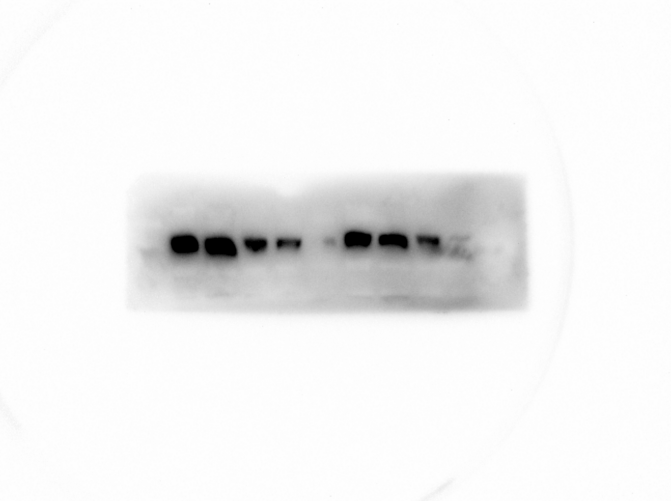


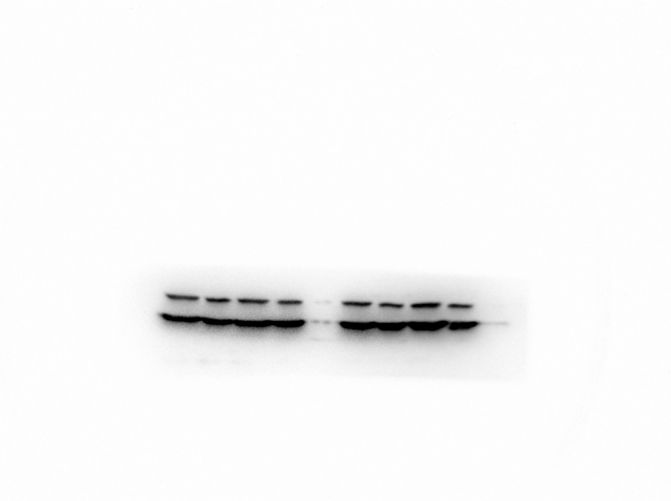

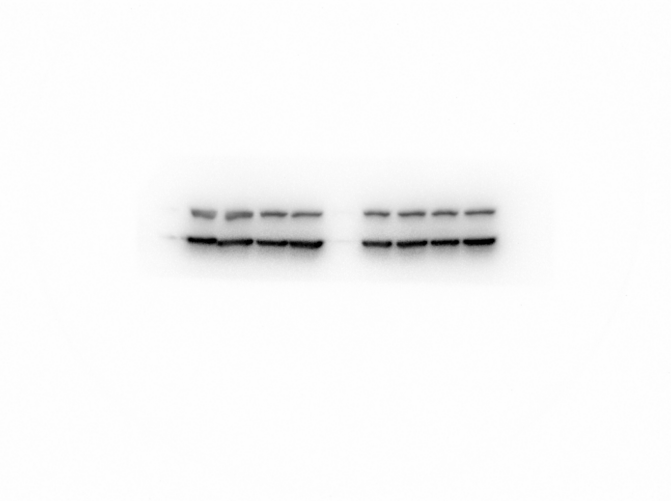

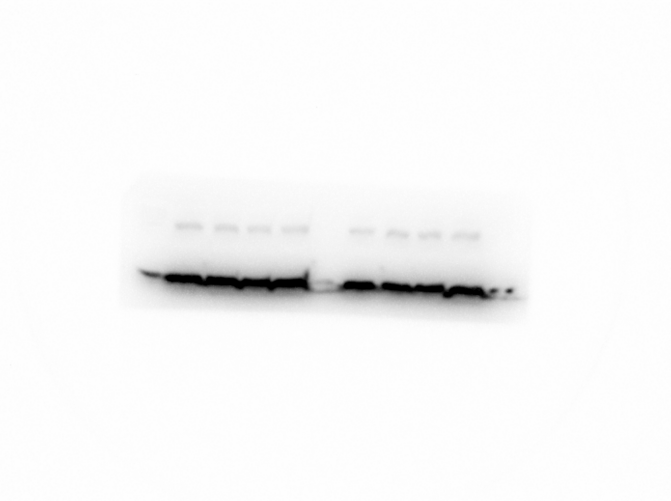


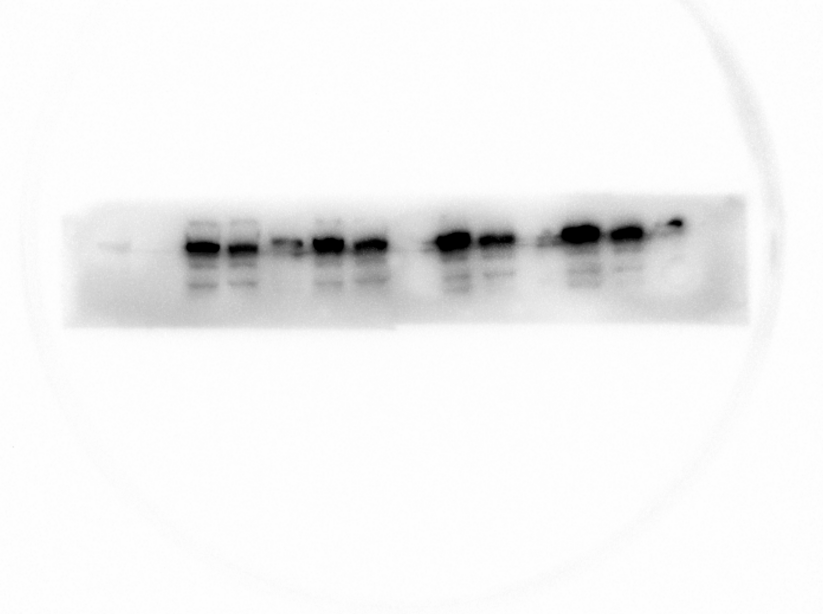


**Fig. 6**

6J IB: GFP

6J Input: GFP

6J IB: CCNB1


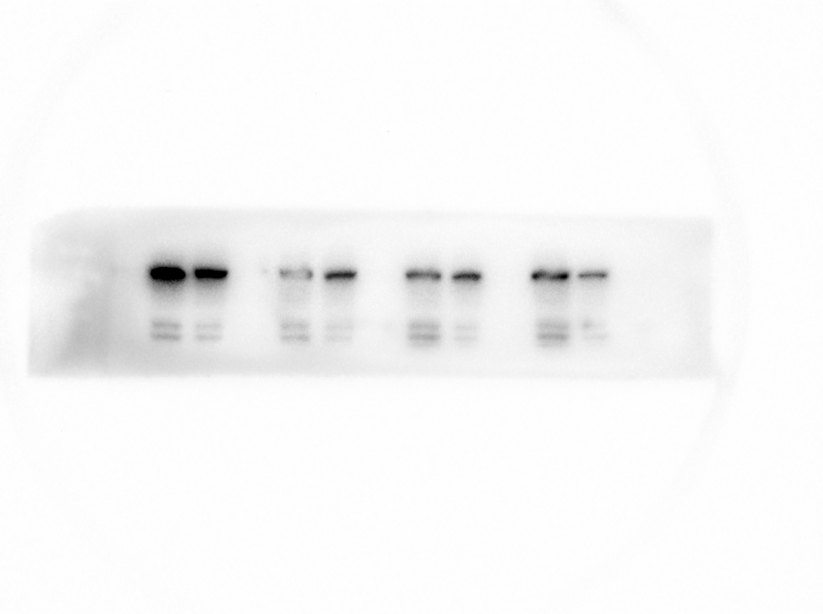


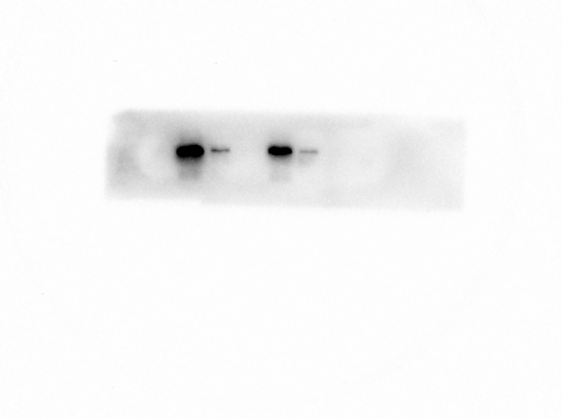


6J Input: CCNB1


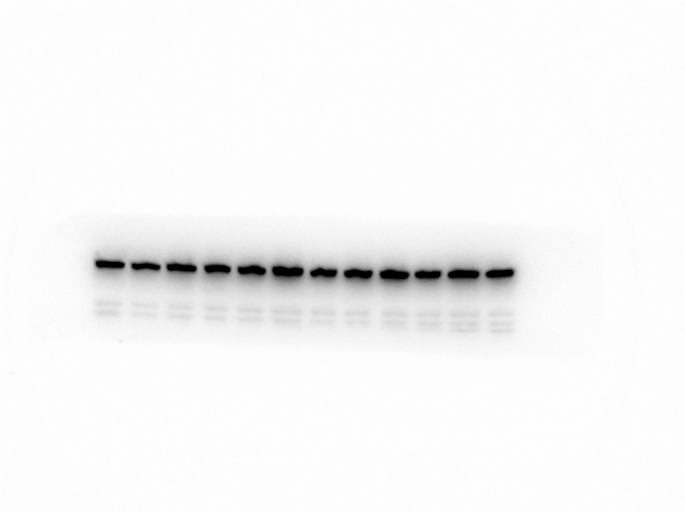

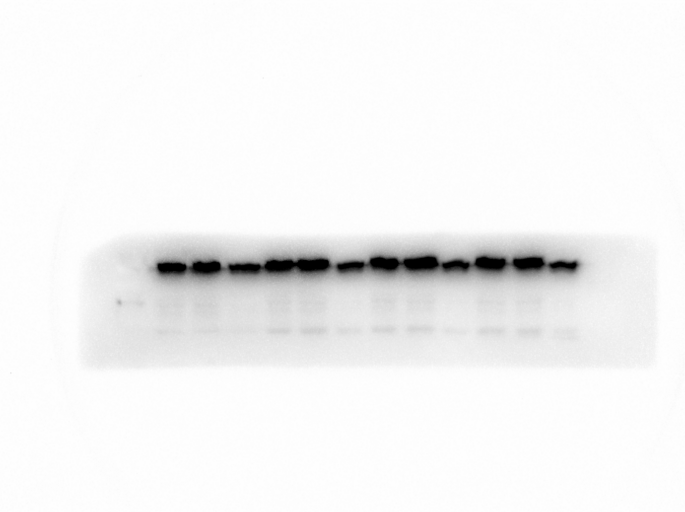


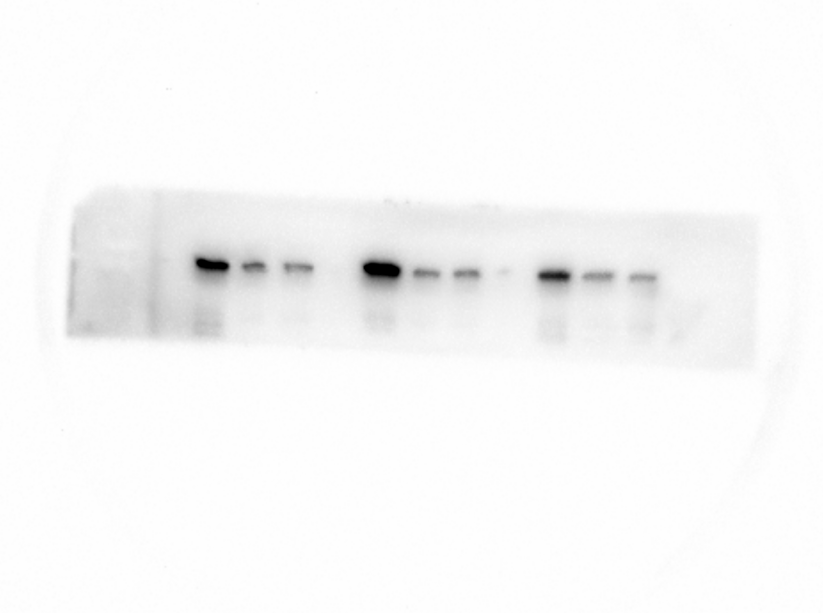

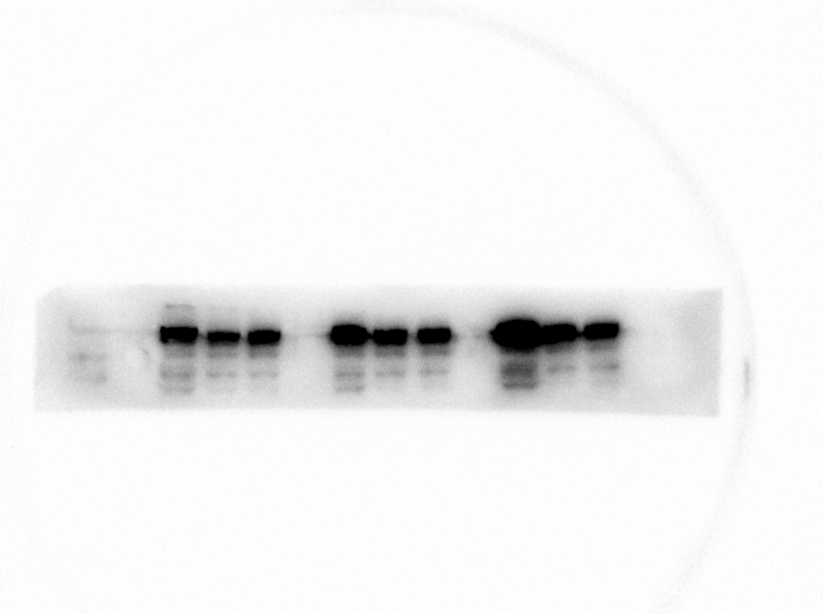


**Fig. 6**

6K IB: GFP

6K Input: GFP

6K IB: CCNB1

6K Input: CCNB1


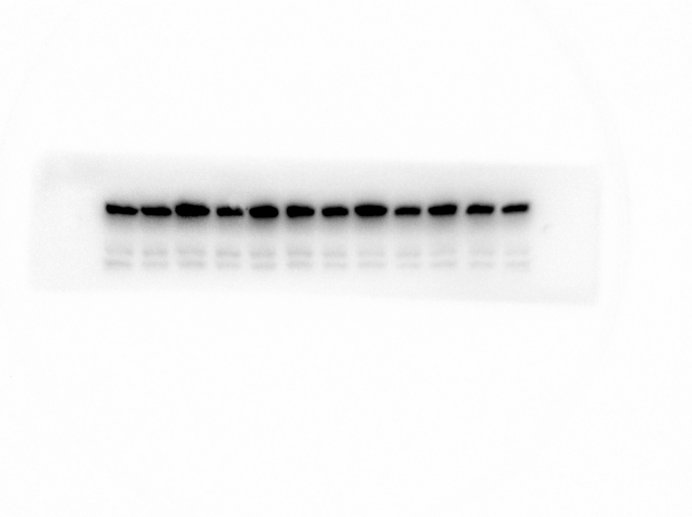

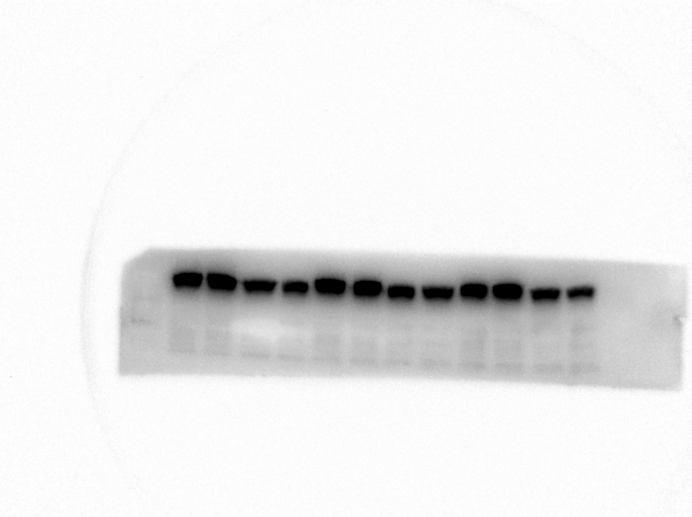


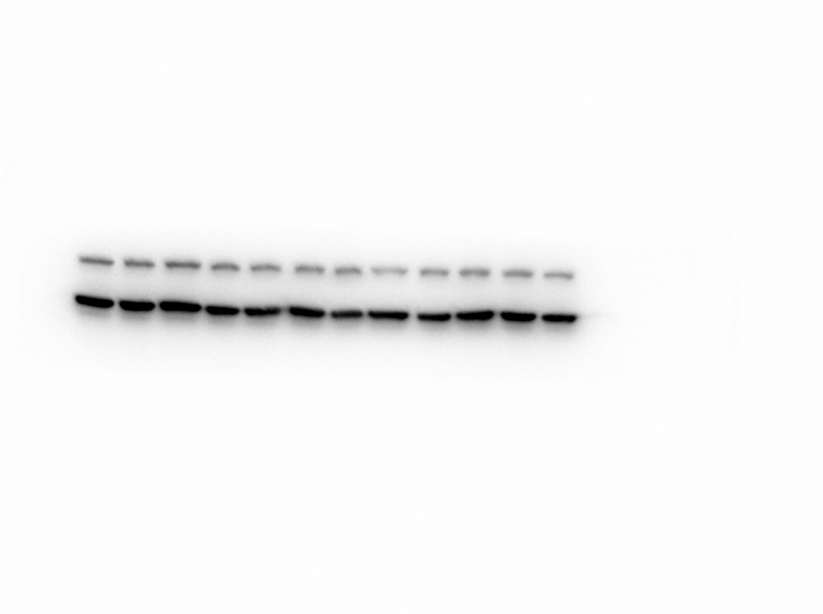

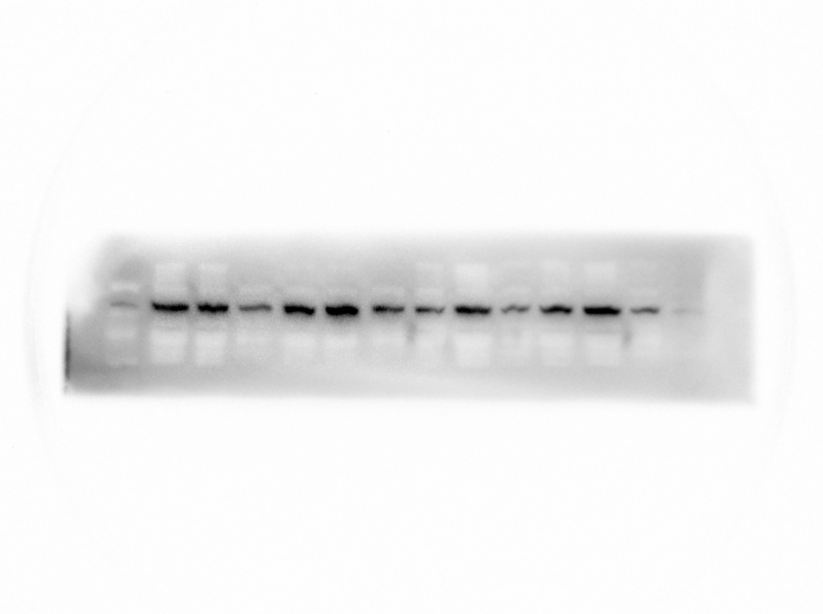


**Fig. 7**

7A CCNB1

7A GAPDH
